# Supplementary material for: World Health Organization cardiovascular disease risk charts: revised models to estimate risk in 21 global regions
Source: PubMed Central journal article supplement (PMC7025029; doi:10.1016/s2214-109x(19)30318-3), 2019-09-02

# THE LANCET

## Global Health

### Supplementary appendix 2

This appendix formed part of the original submission and has been peer reviewed. We post it as supplied by the authors.

Supplement to: The WHO CVD Risk Chart Working Group. World Health Organization cardiovascular disease risk charts: revised models to estimate risk in 21 global regions. *Lancet Glob Health* 2019; published online Sept 2. [http://dx.doi.org/10.1016/S2214-109X\(19\)30318-3](http://dx.doi.org/10.1016/S2214-109X(19)30318-3).

## WHO cardiovascular disease risk laboratory-based charts

North Africa and Middle East

Risk Level ■ <5% ■ 5% to <10% ■ 10% to <20% ■ 20% to <30% ■ ≥30%

People without Diabetes

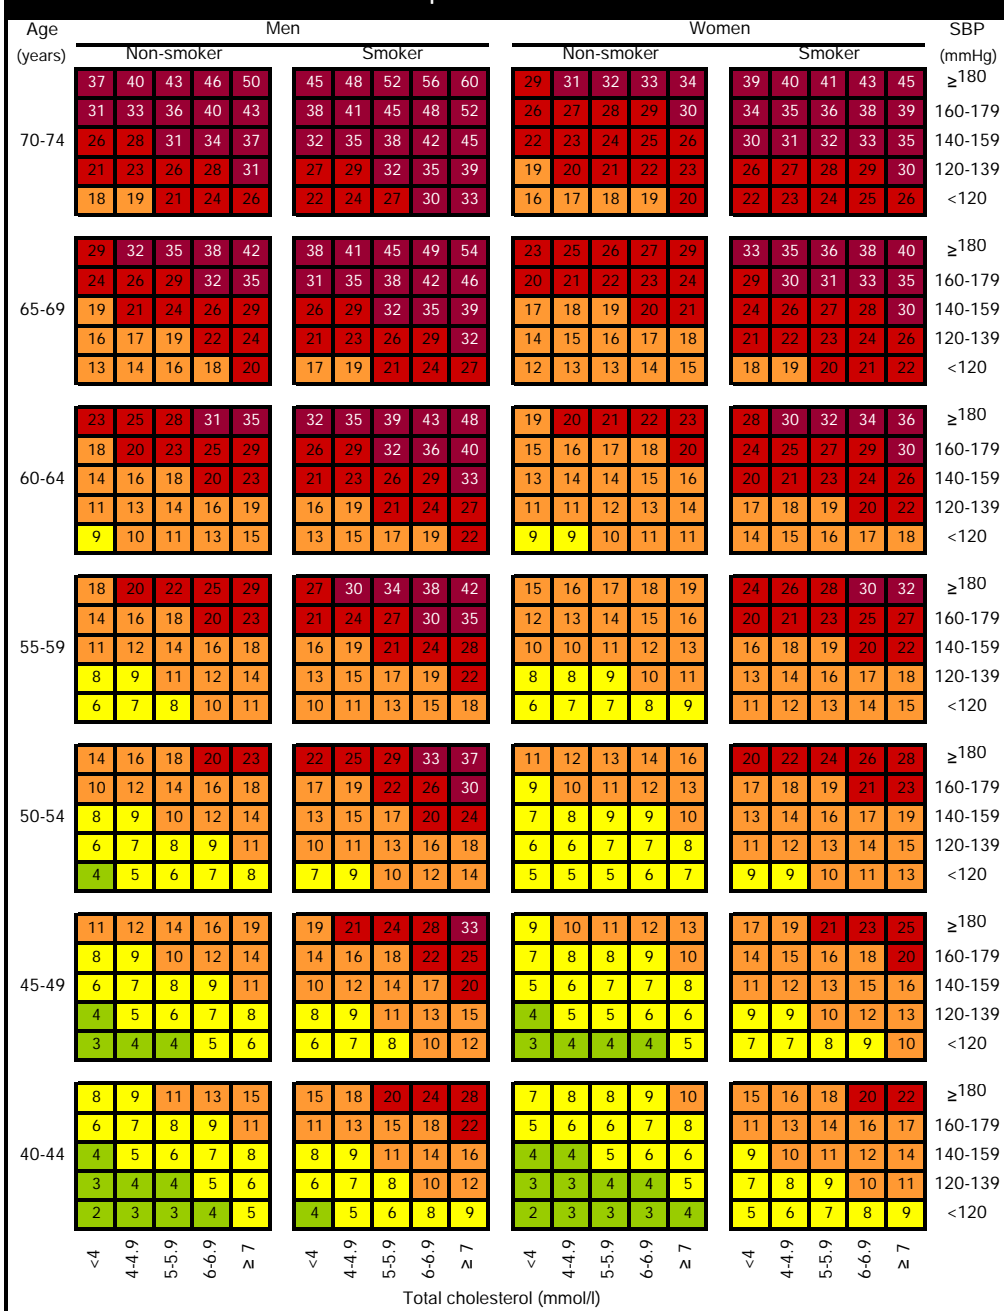

North Africa and Middle East

Risk Level ■ <5% ■ 5% to <10% ■ 10% to <20% ■ 20% to <30% ■ ≥30%

People with Diabetes

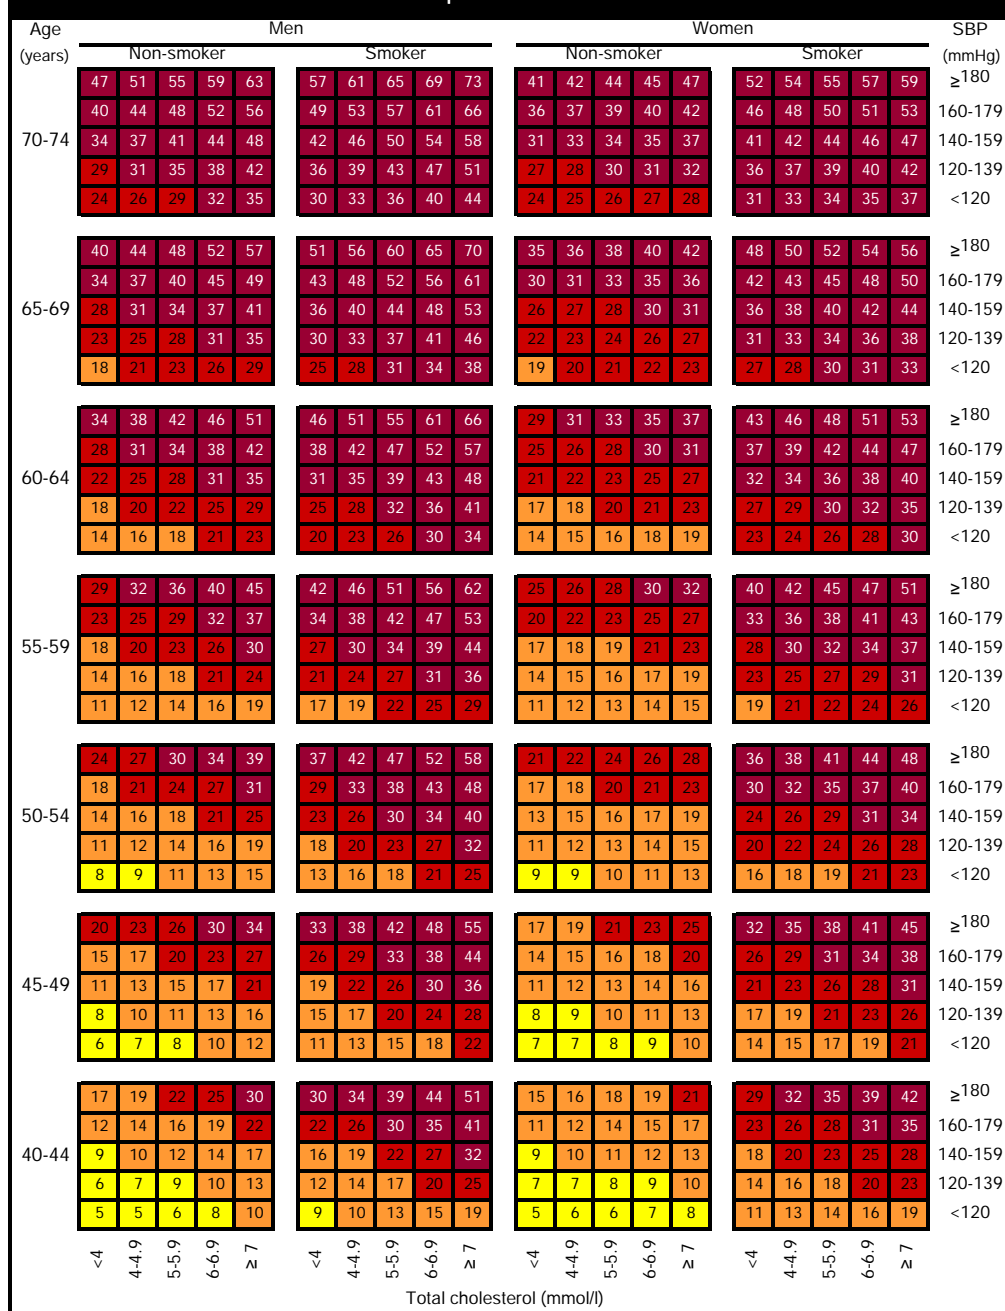

Central Sub-Saharan Africa

Risk Level ■ <5% ■ 5% to <10% ■ 10% to <20% ■ 20% to <30% ■ ≥30%

People without Diabetes

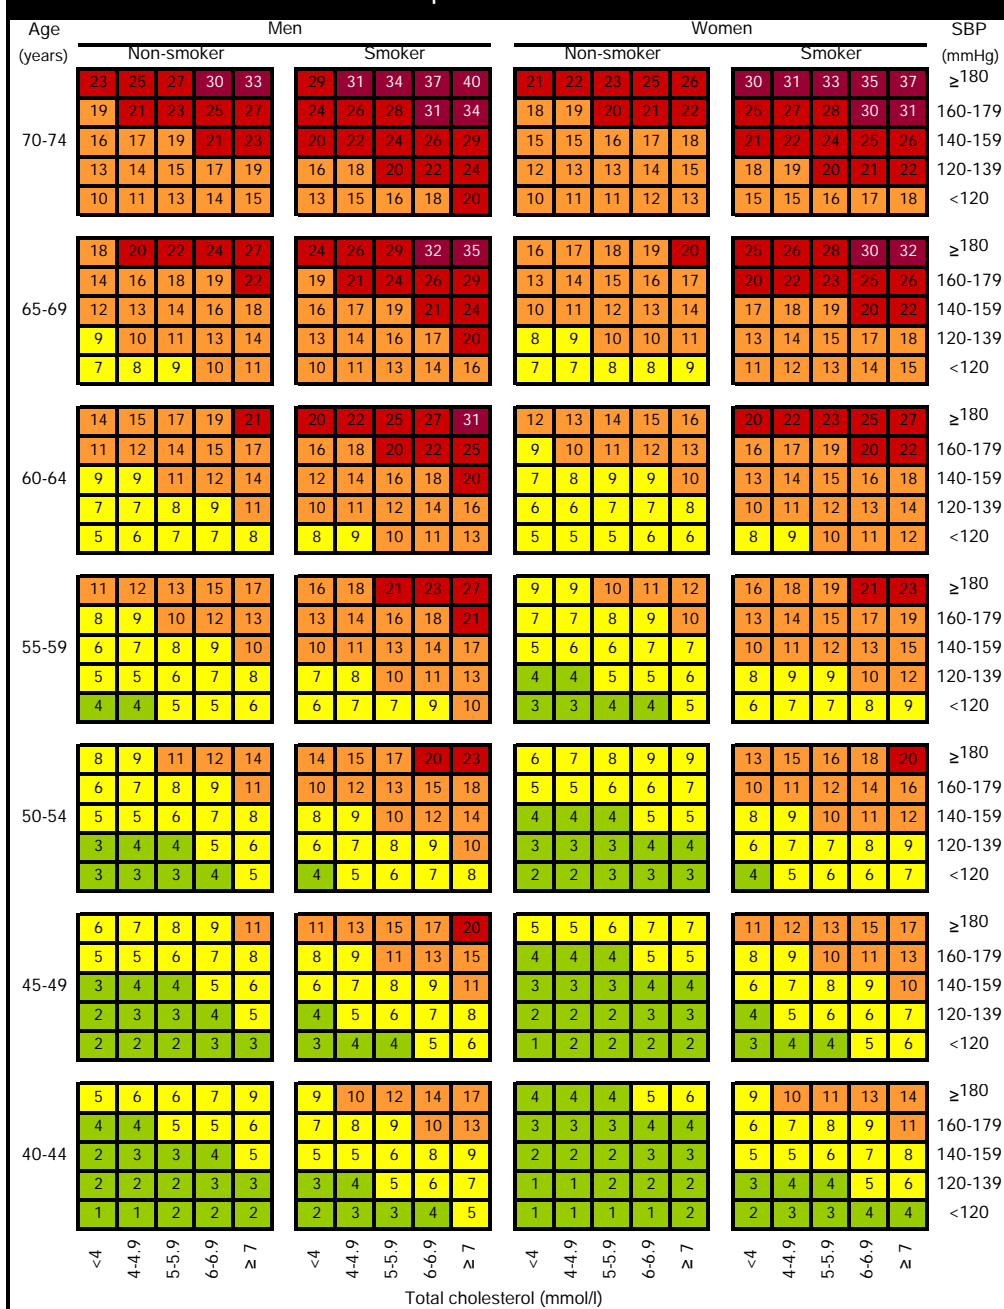

Central Sub-Saharan Africa

Risk Level ■ <5% ■ 5% to <10% ■ 10% to <20% ■ 20% to <30% ■ ≥30%

People with Diabetes

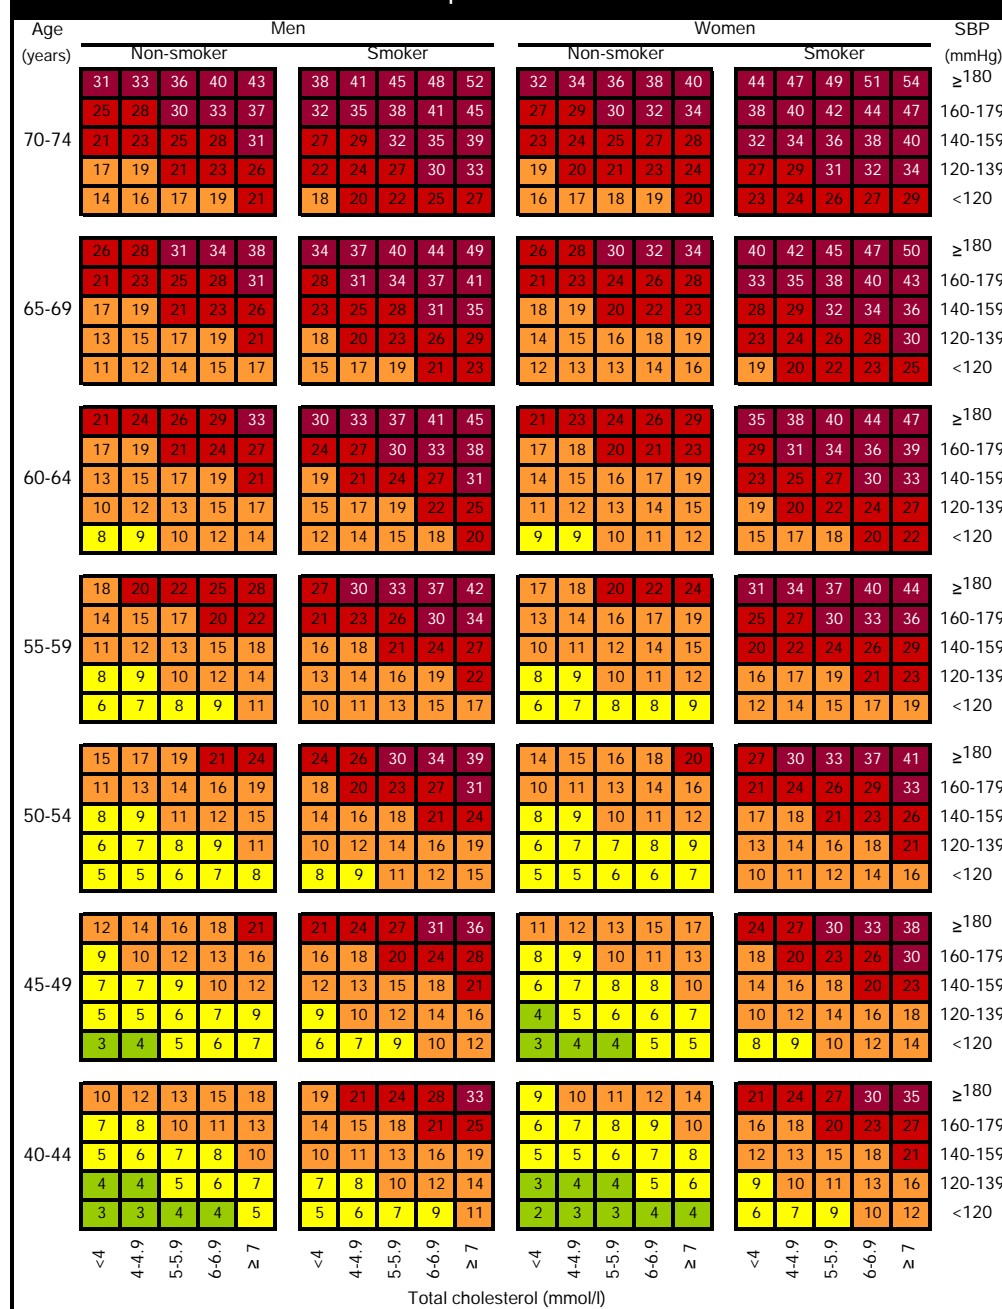

Eastern Sub-Saharan Africa

Risk Level ■ <5% ■ 5% to <10% ■ 10% to <20% ■ 20% to <30% ■ ≥30%

People without Diabetes

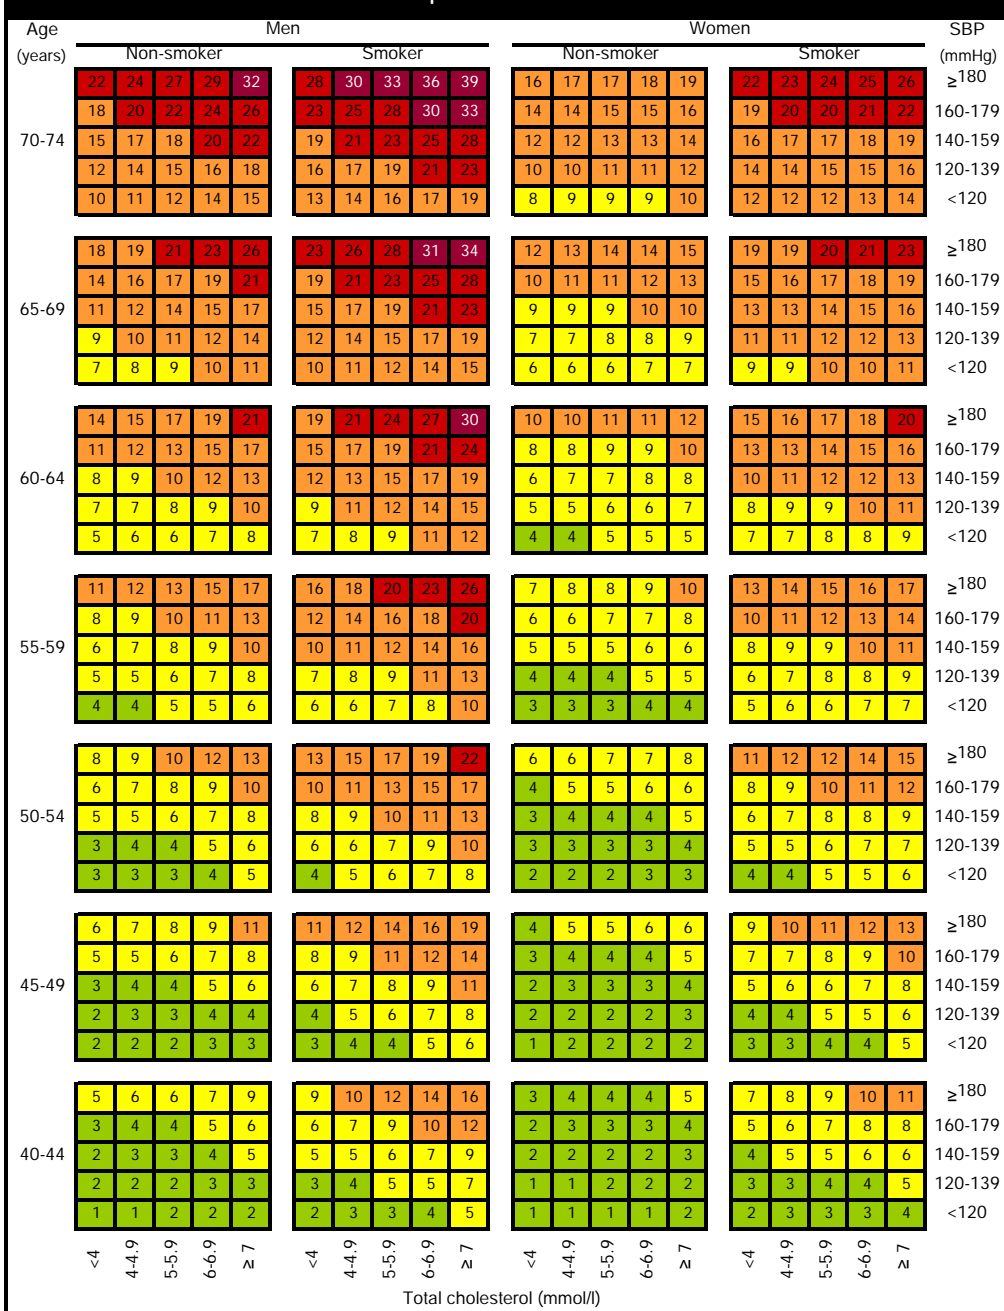

Eastern Sub-Saharan Africa

Risk Level ■ <5% ■ 5% to <10% ■ 10% to <20% ■ 20% to <30% ■ ≥30%

People with Diabetes

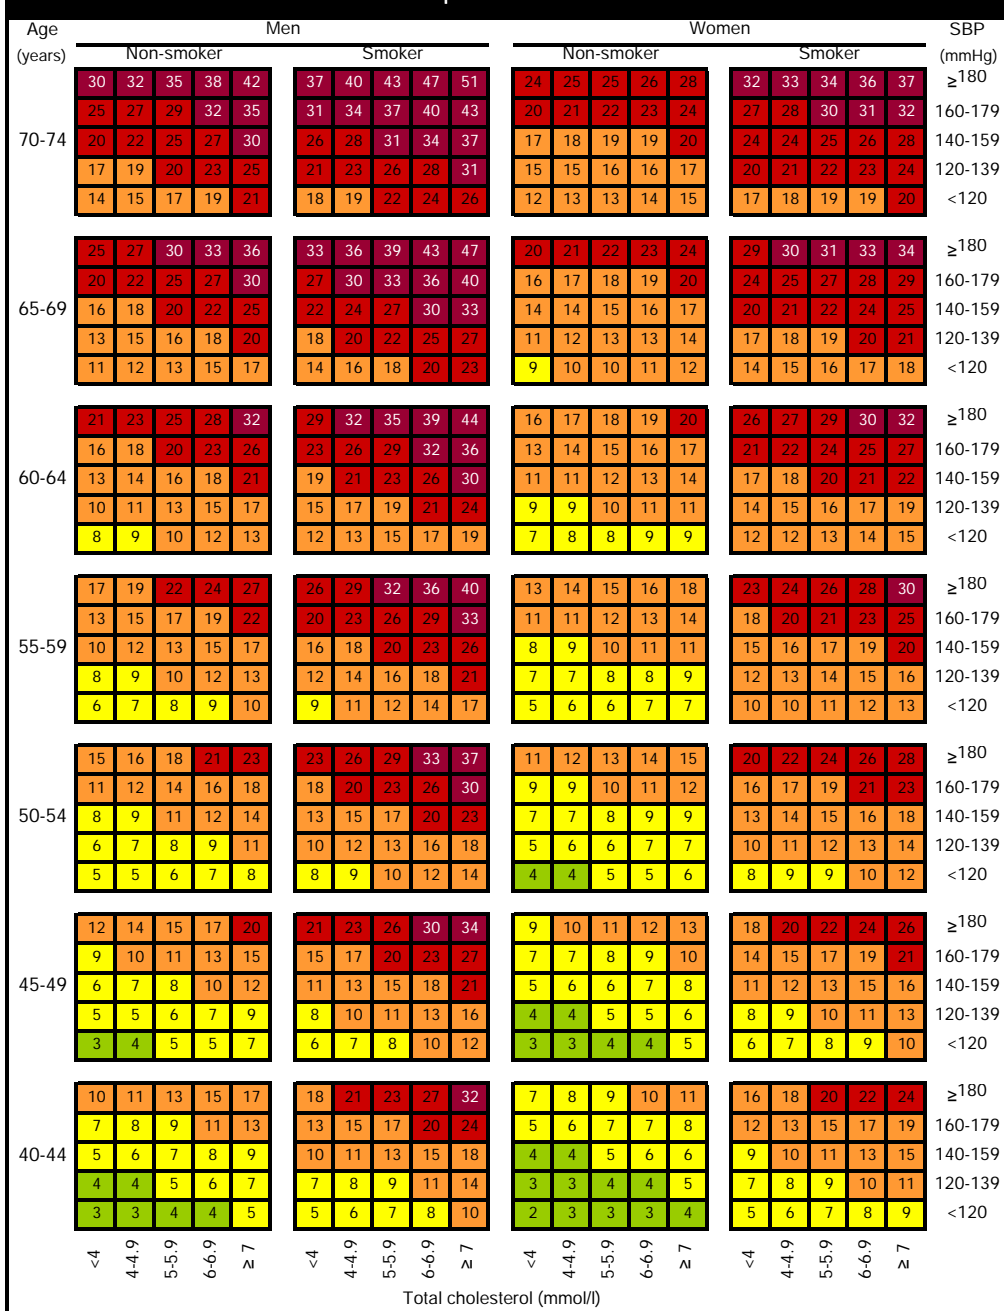

Southern Sub-Saharan Africa

Risk Level ■ <5% ■ 5% to <10% ■ 10% to <20% ■ 20% to <30% ■ ≥30%

People without Diabetes

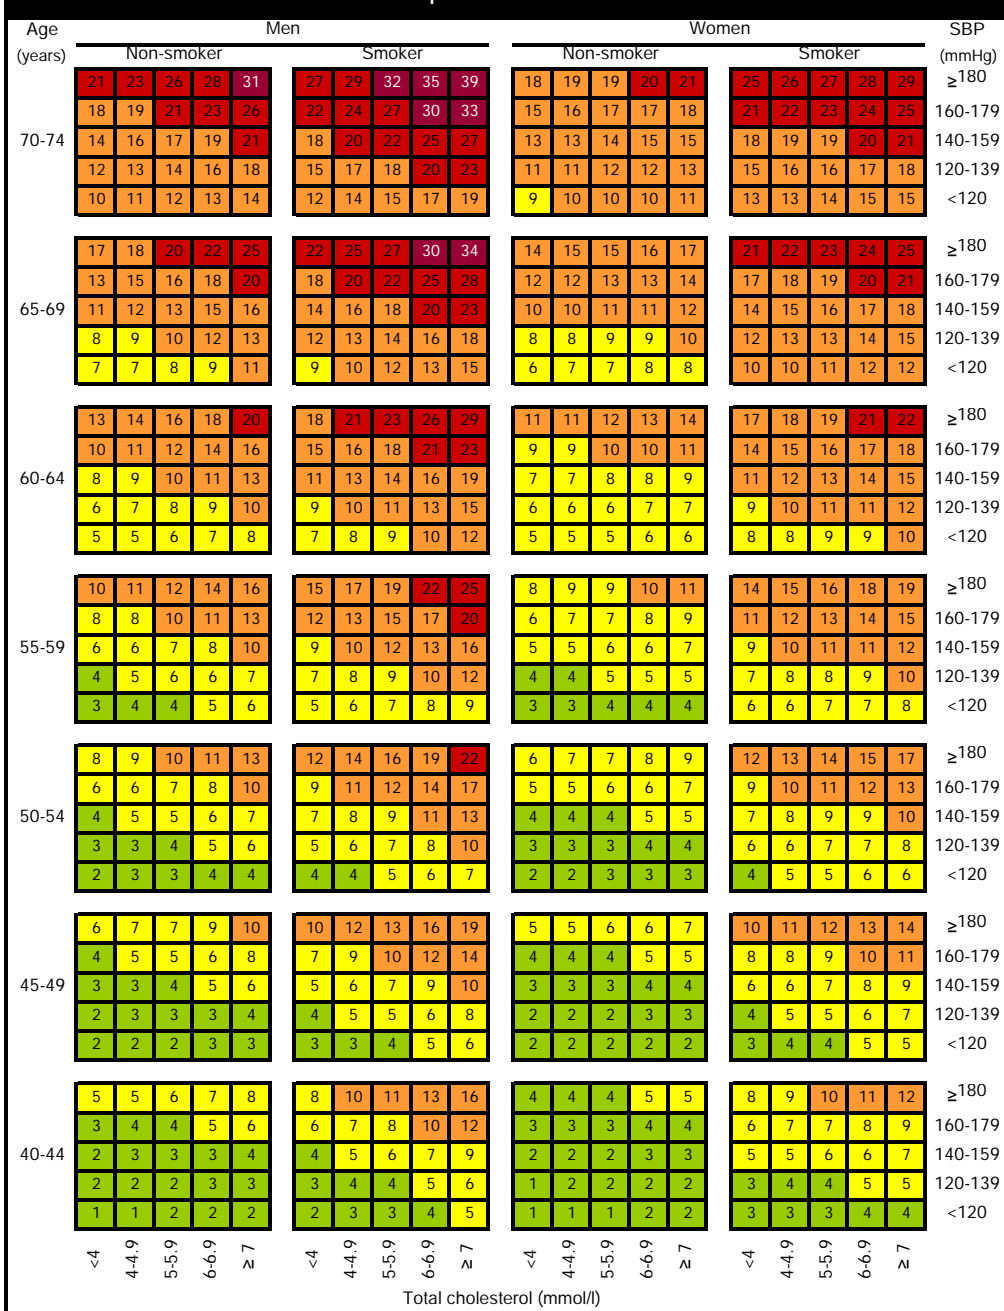

Southern Sub-Saharan Africa

Risk Level ■ <5% ■ 5% to <10% ■ 10% to <20% ■ 20% to <30% ■ ≥30%

People with Diabetes

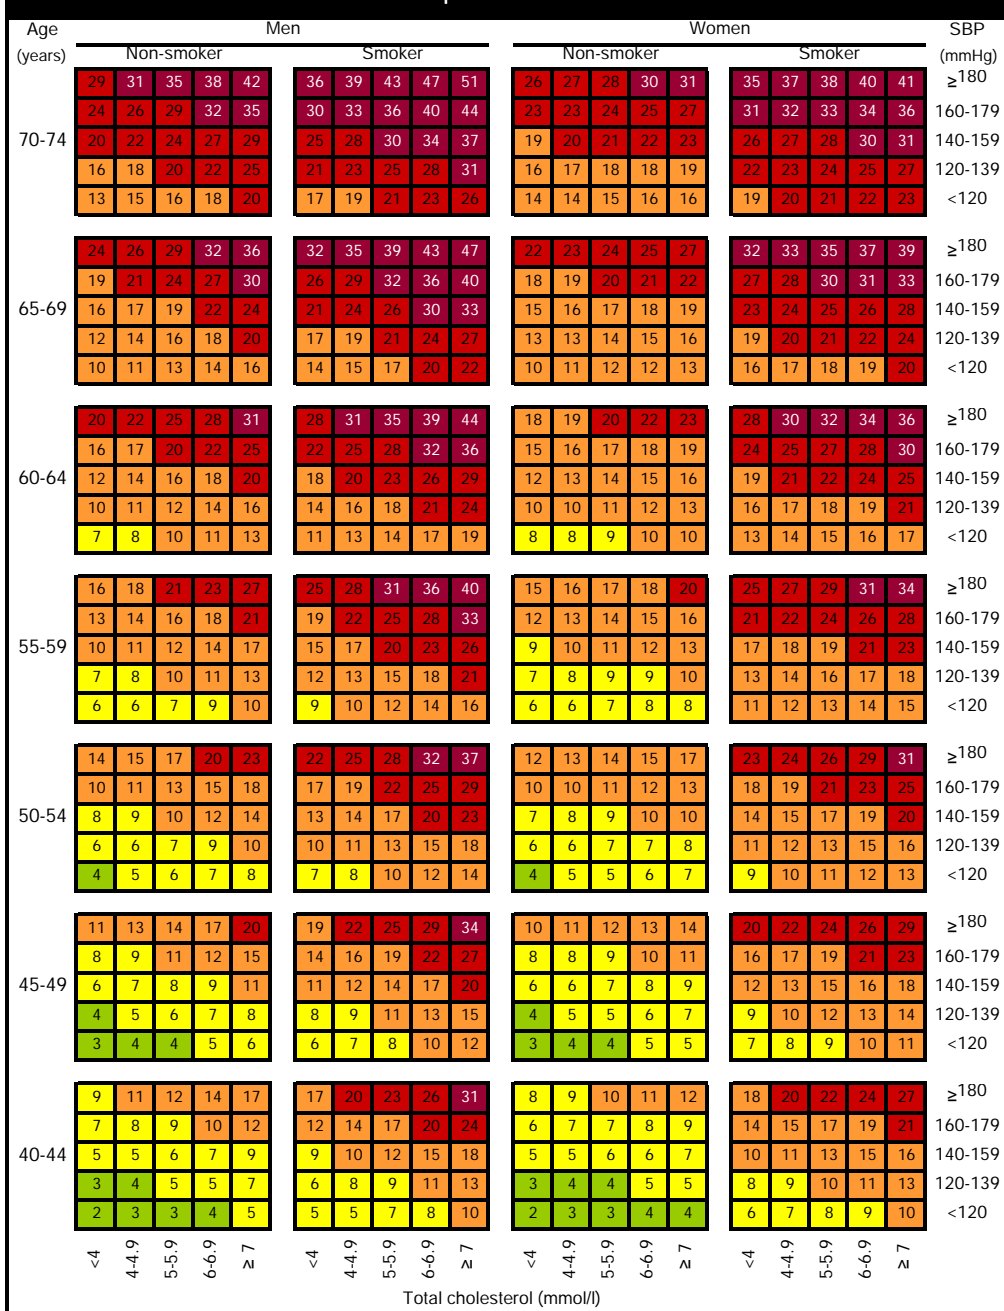

Western Sub-Saharan Africa

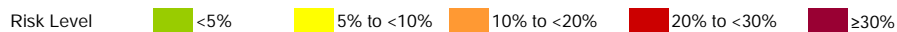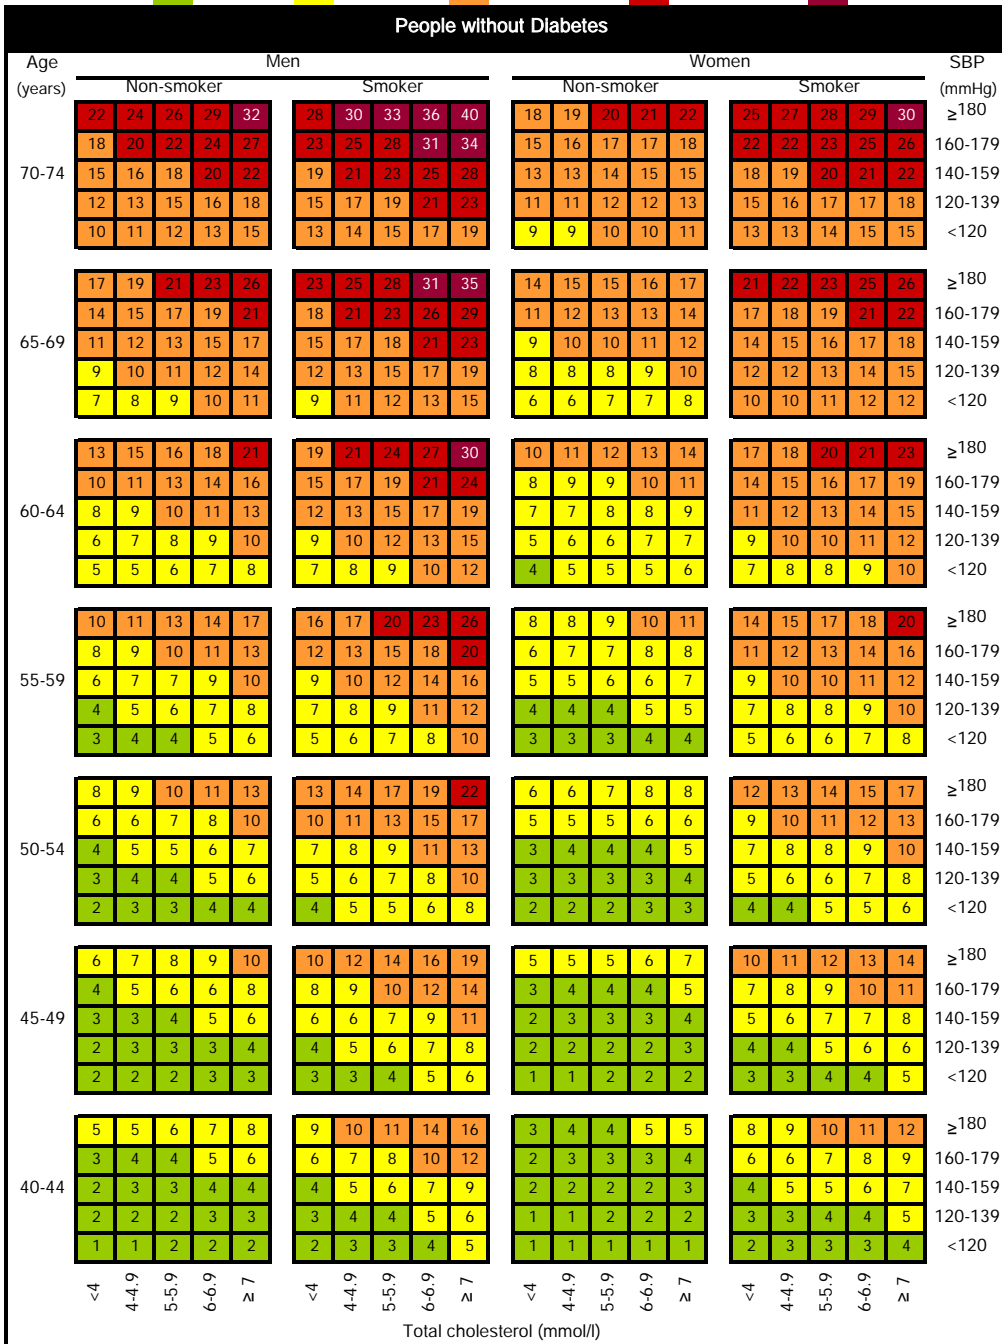

Western Sub-Saharan Africa

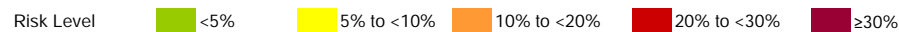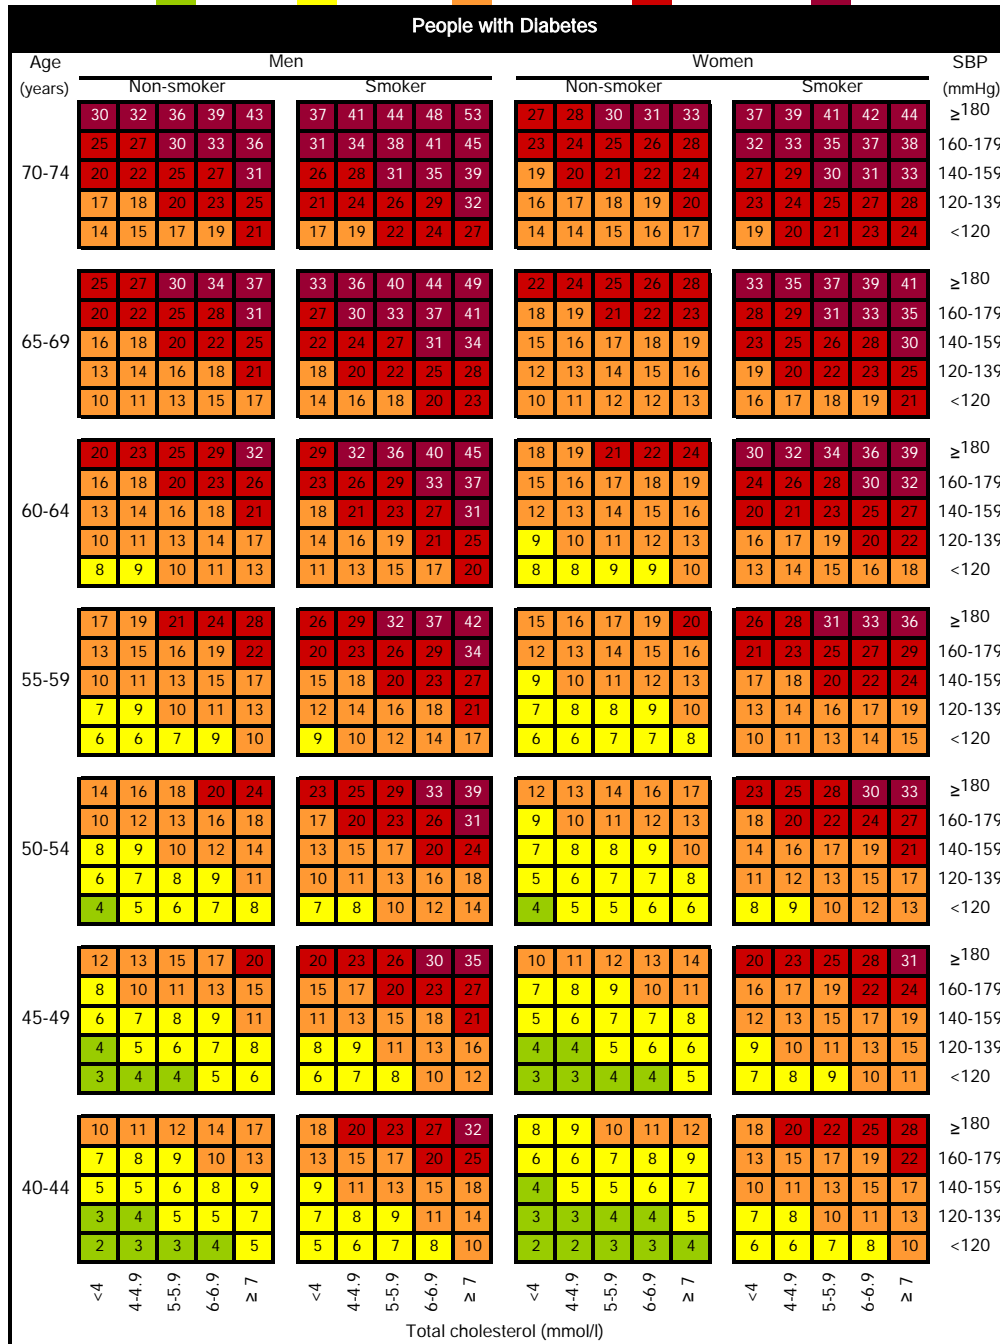

Southern Latin America

Risk Level ■ <5% ■ 5% to <10% ■ 10% to <20% ■ 20% to <30% ■ ≥30%

People without Diabetes

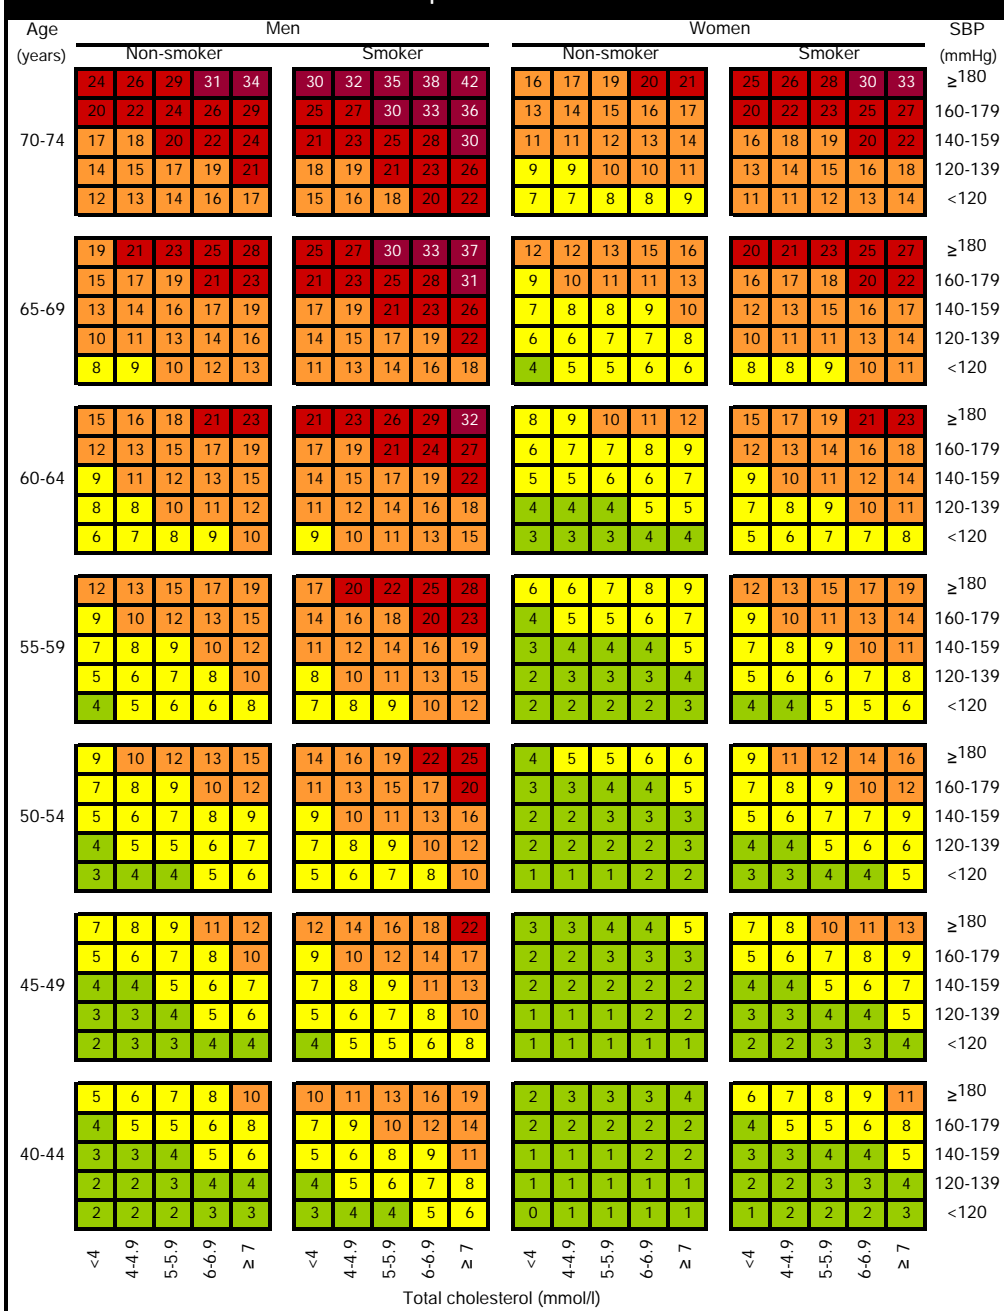

Southern Latin America

Risk Level ■ <5% ■ 5% to <10% ■ 10% to <20% ■ 20% to <30% ■ ≥30%

People with Diabetes

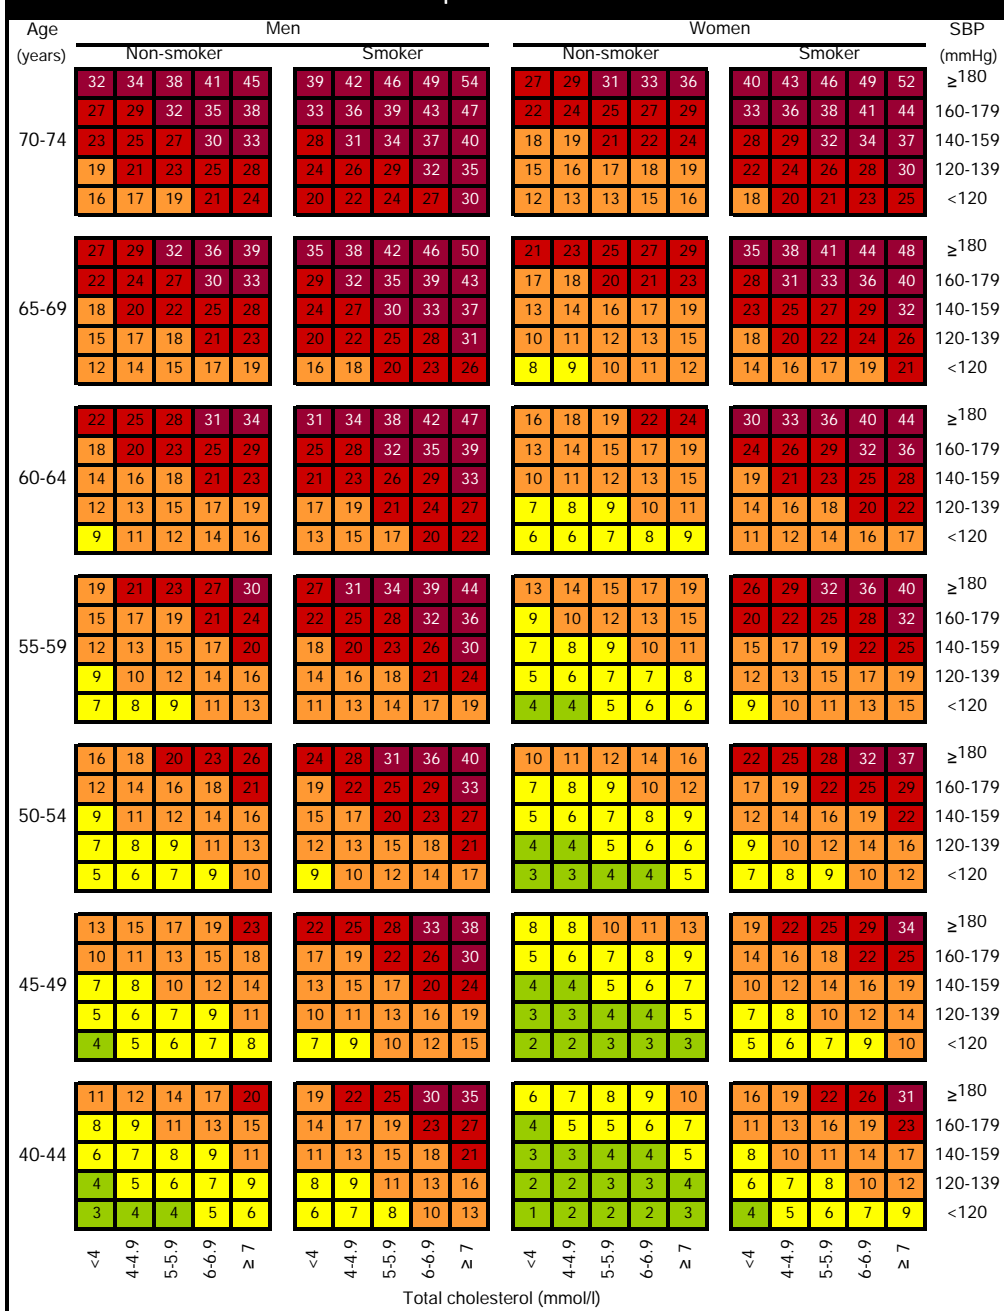



### High-income North America

Risk Level ■ <5% ■ 5% to <10% ■ 10% to <20% ■ 20% to <30% ■ ≥30%

#### People without Diabetes

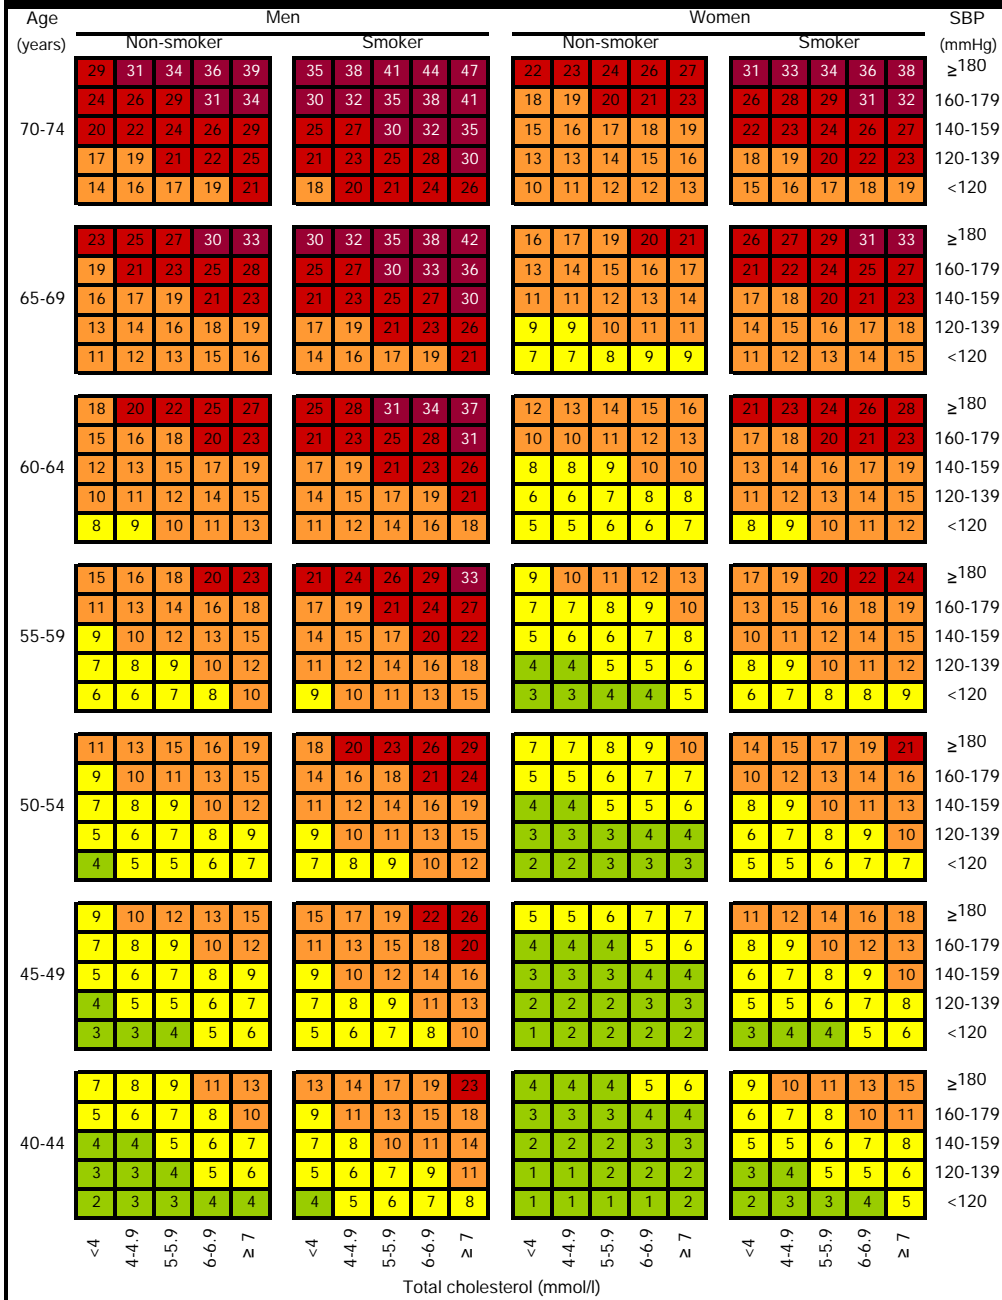

### High-income North America

Risk Level ■ <5% ■ 5% to <10% ■ 10% to <20% ■ 20% to <30% ■ ≥30%

#### People with Diabetes

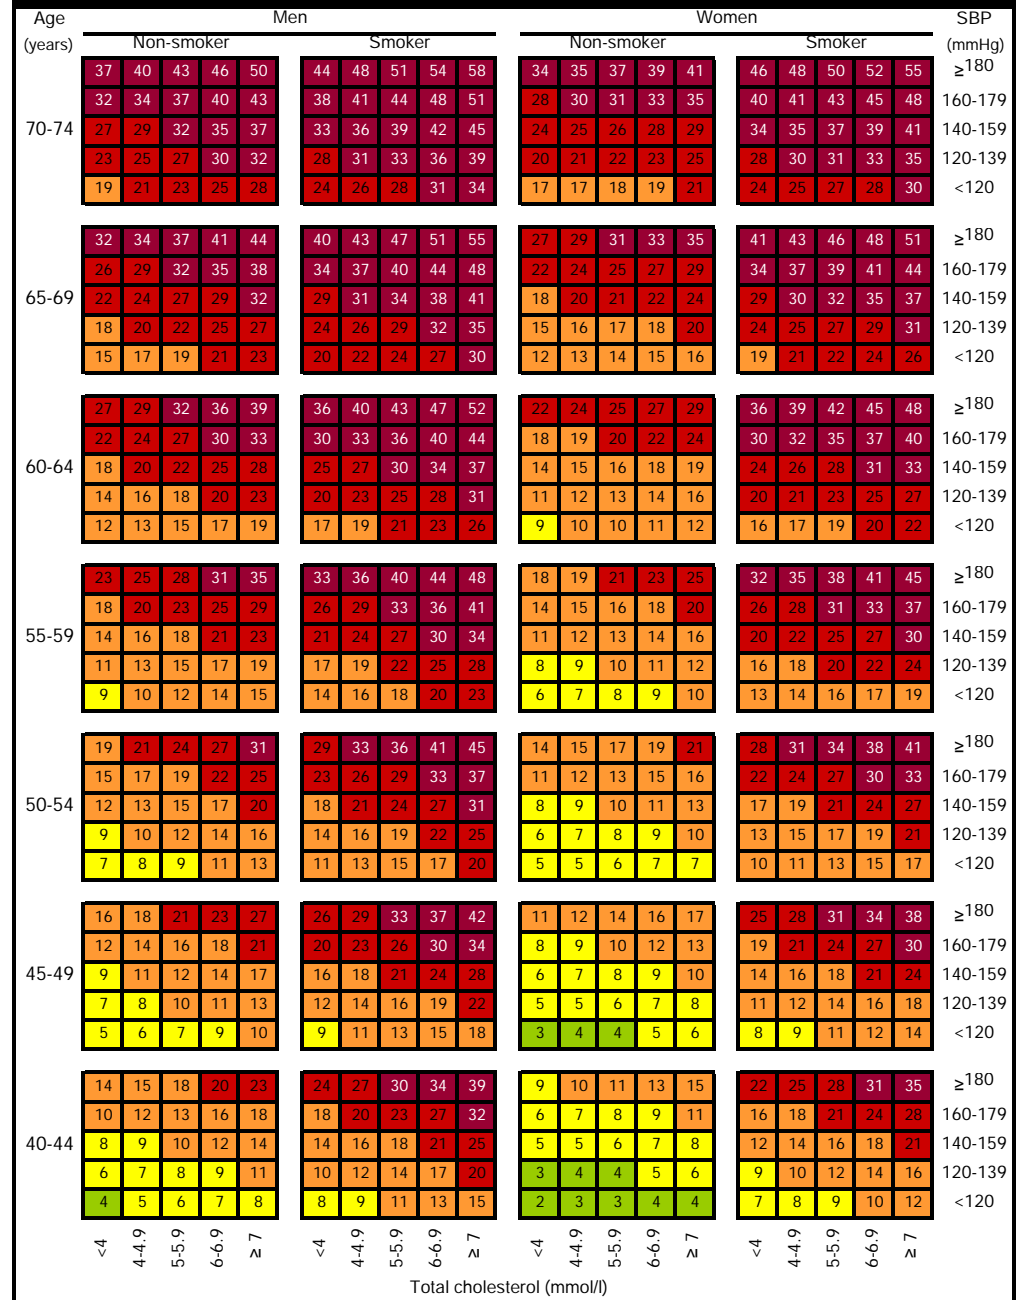

Caribbean

Risk Level <5% 5% to <10% 10% to <20% 20% to <30% ≥30%

People without Diabetes

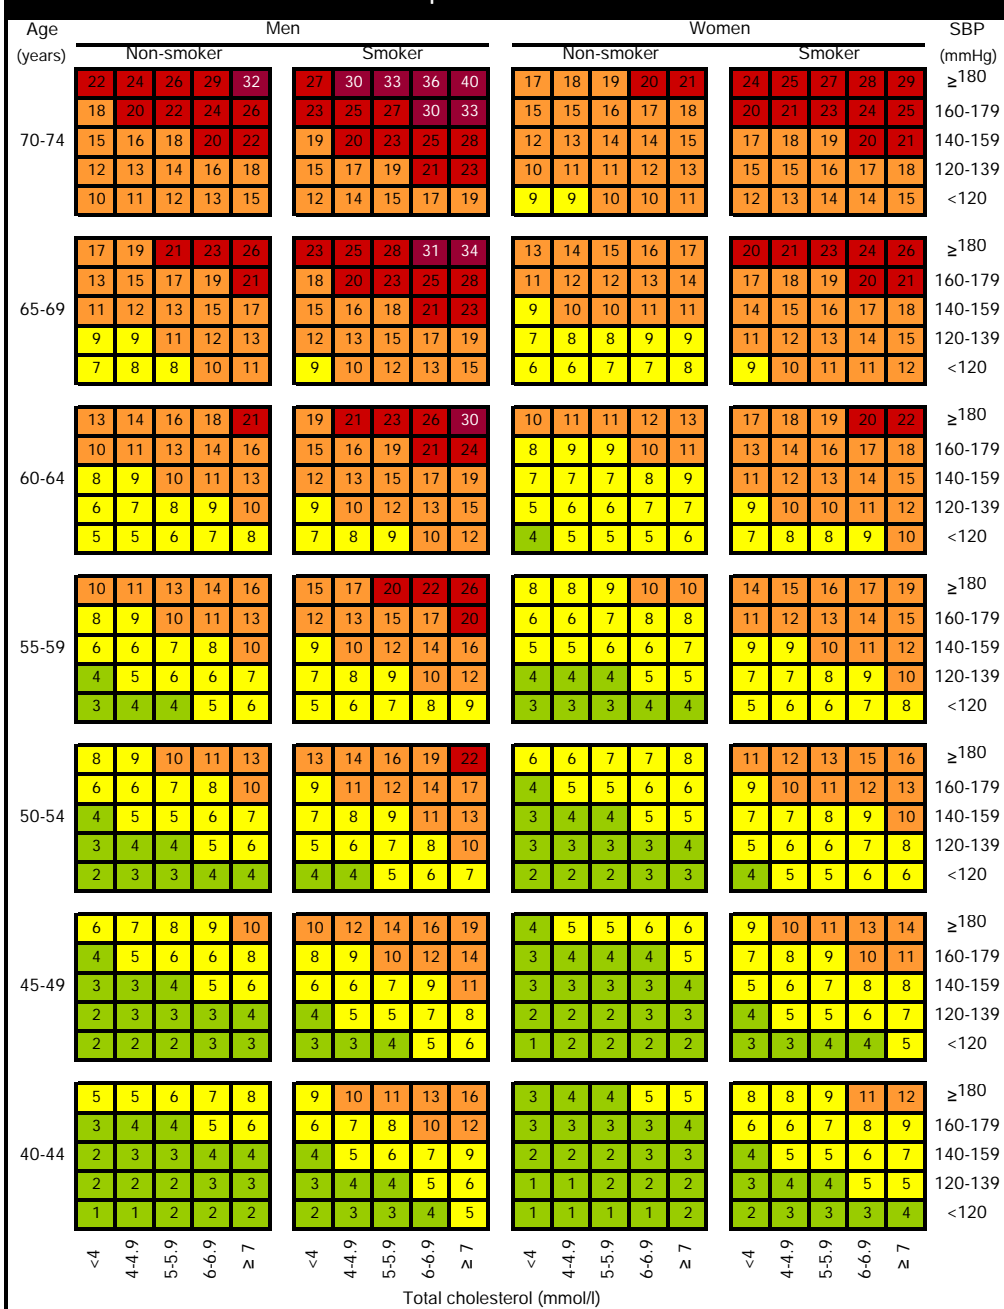

Caribbean

Risk Level <5% 5% to <10% 10% to <20% 20% to <30% ≥30%

People with Diabetes

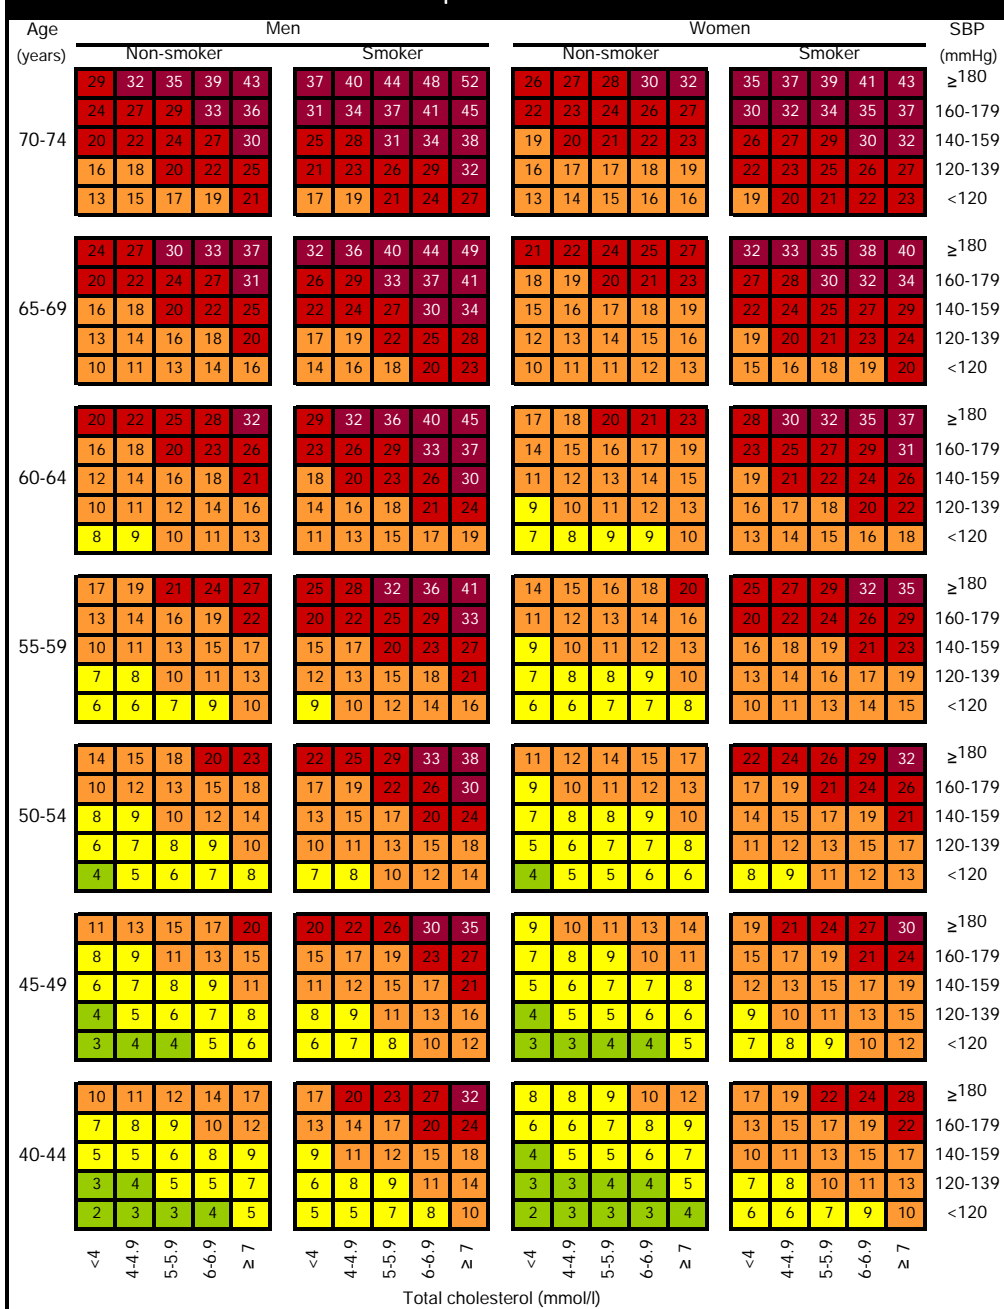

Andean Latin America

Risk Level ■ <5% ■ 5% to <10% ■ 10% to <20% ■ 20% to <30% ■ ≥30%

People without Diabetes

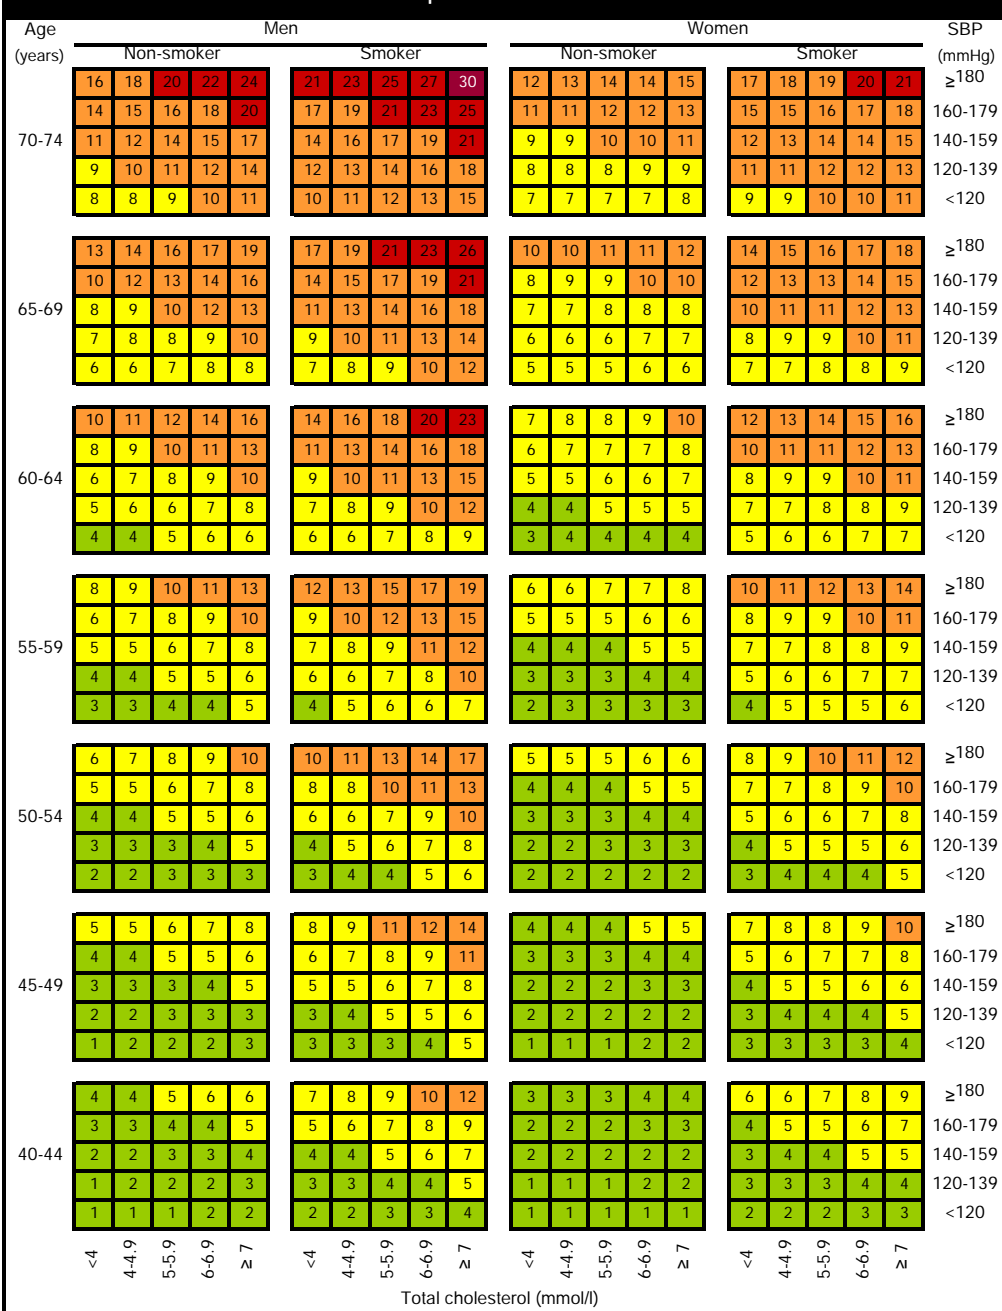

Andean Latin America

Risk Level ■ <5% ■ 5% to <10% ■ 10% to <20% ■ 20% to <30% ■ ≥30%

People with Diabetes

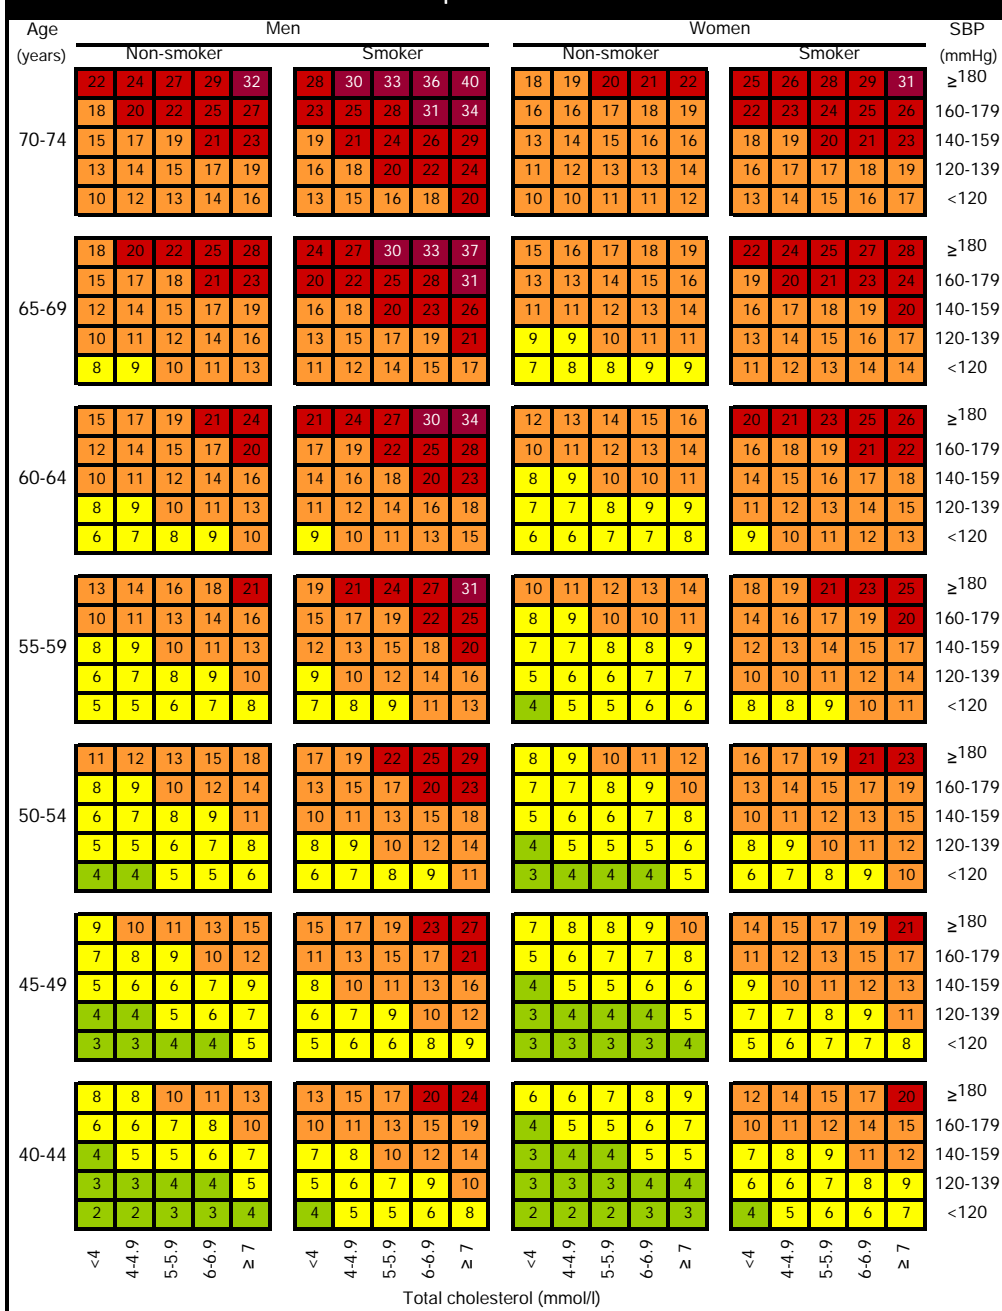

Central Latin America

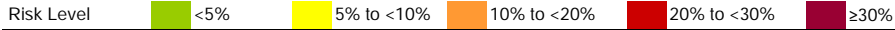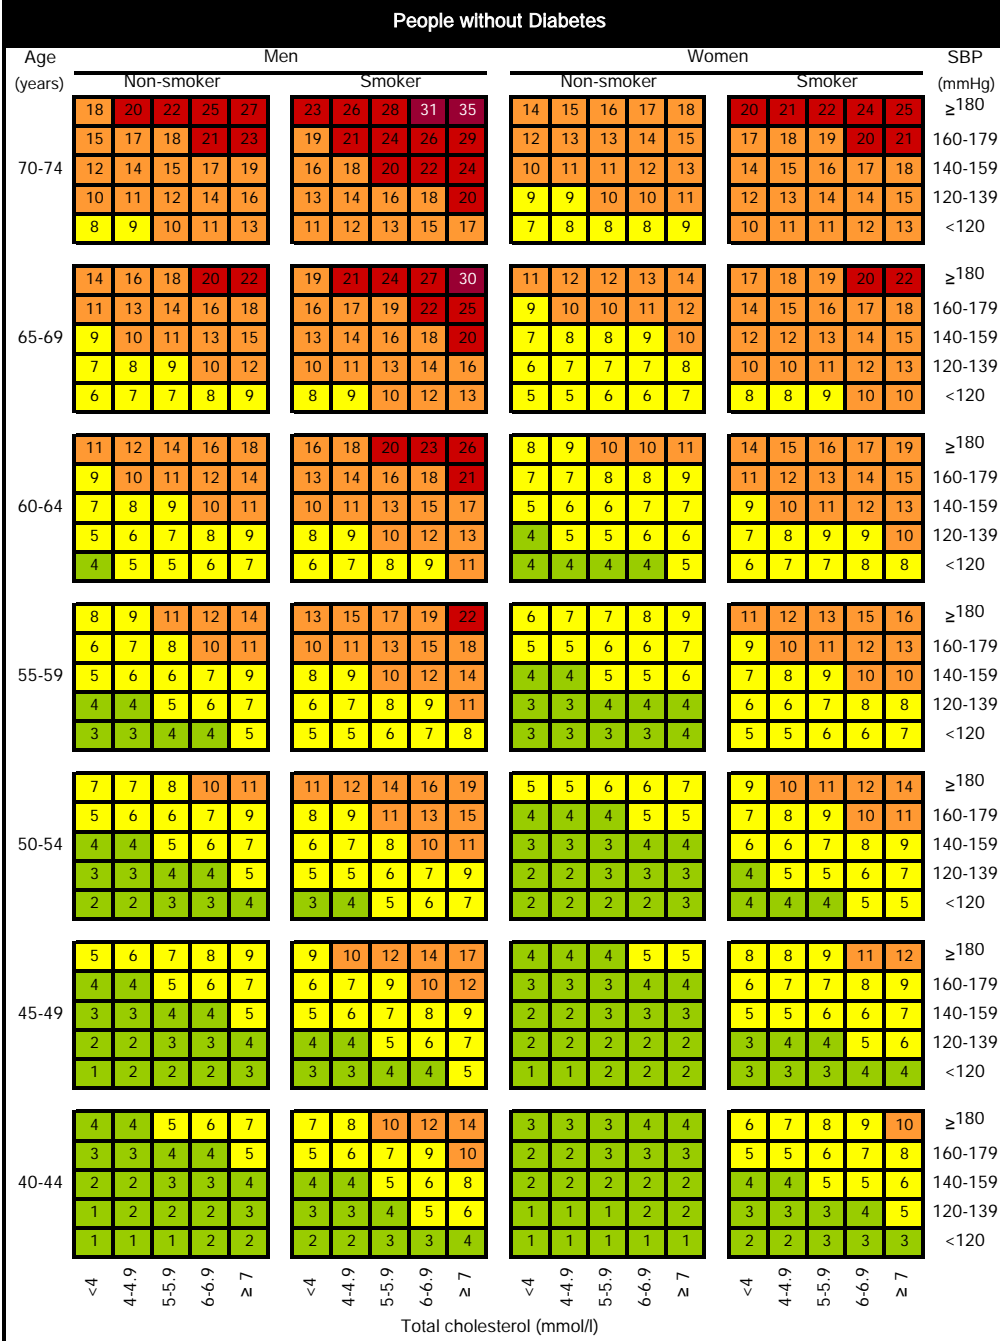

Central Latin America

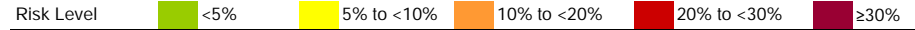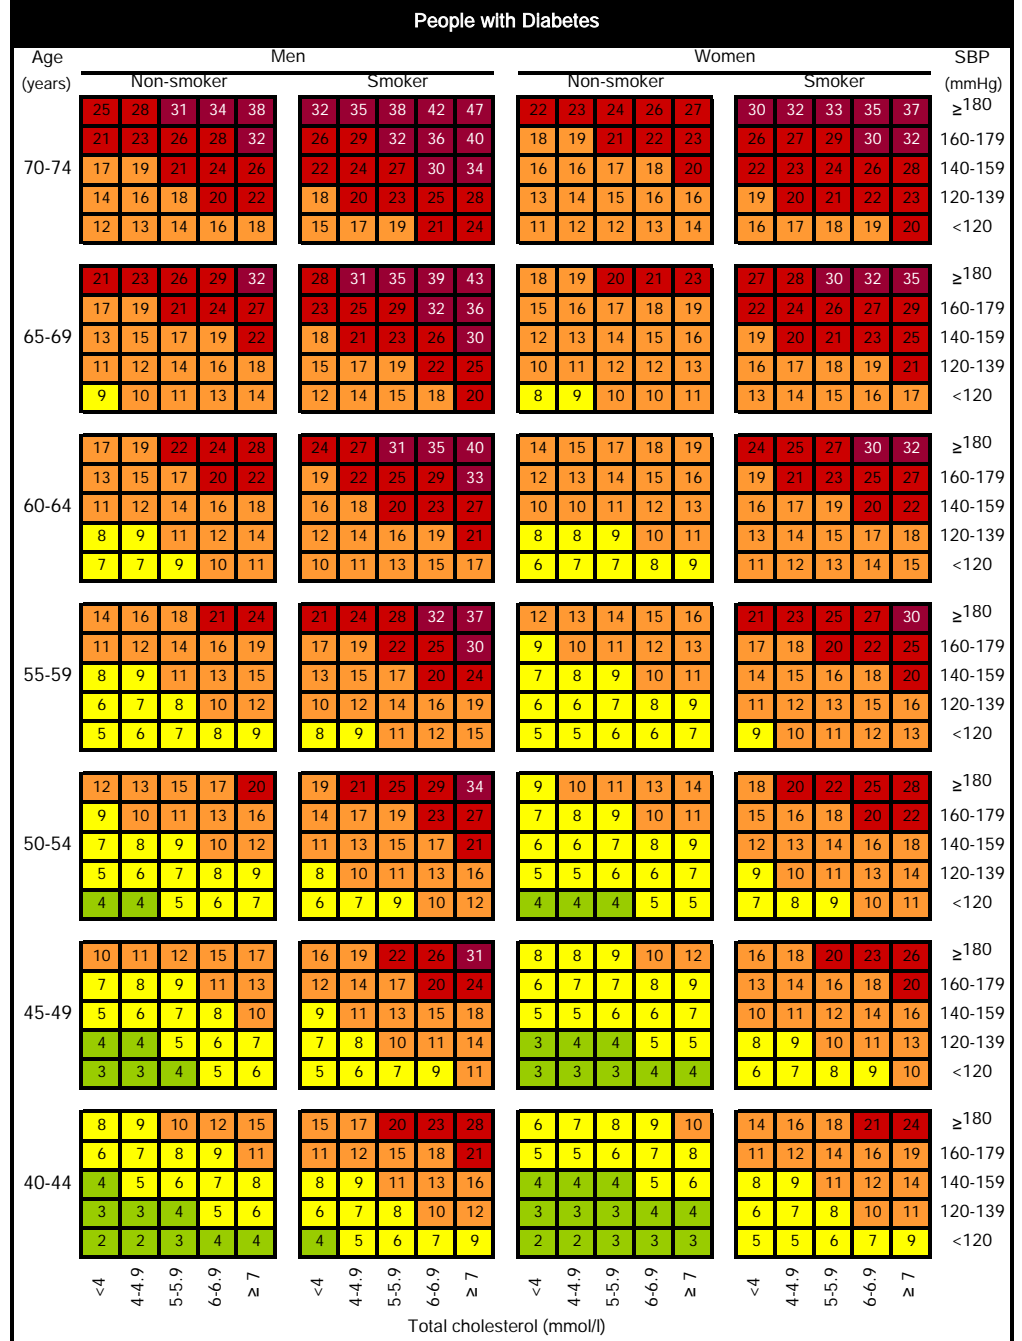

**Tropical Latin America**

Risk Level ■ <5% ■ 5% to <10% ■ 10% to <20% ■ 20% to <30% ■ ≥30%

**People without Diabetes**

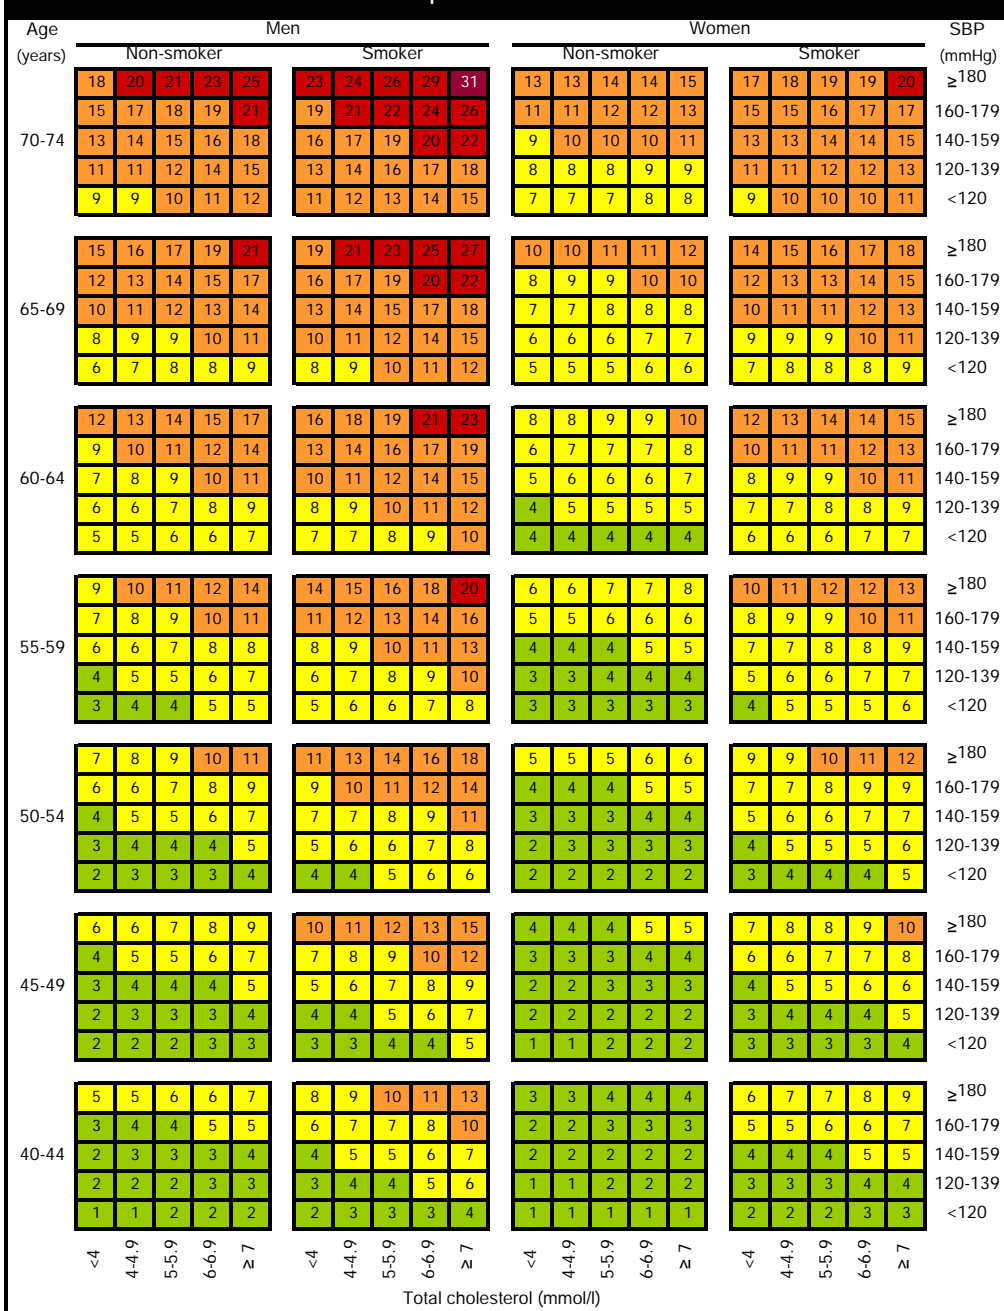

**Tropical Latin America**

Risk Level ■ <5% ■ 5% to <10% ■ 10% to <20% ■ 20% to <30% ■ ≥30%

**People with Diabetes**

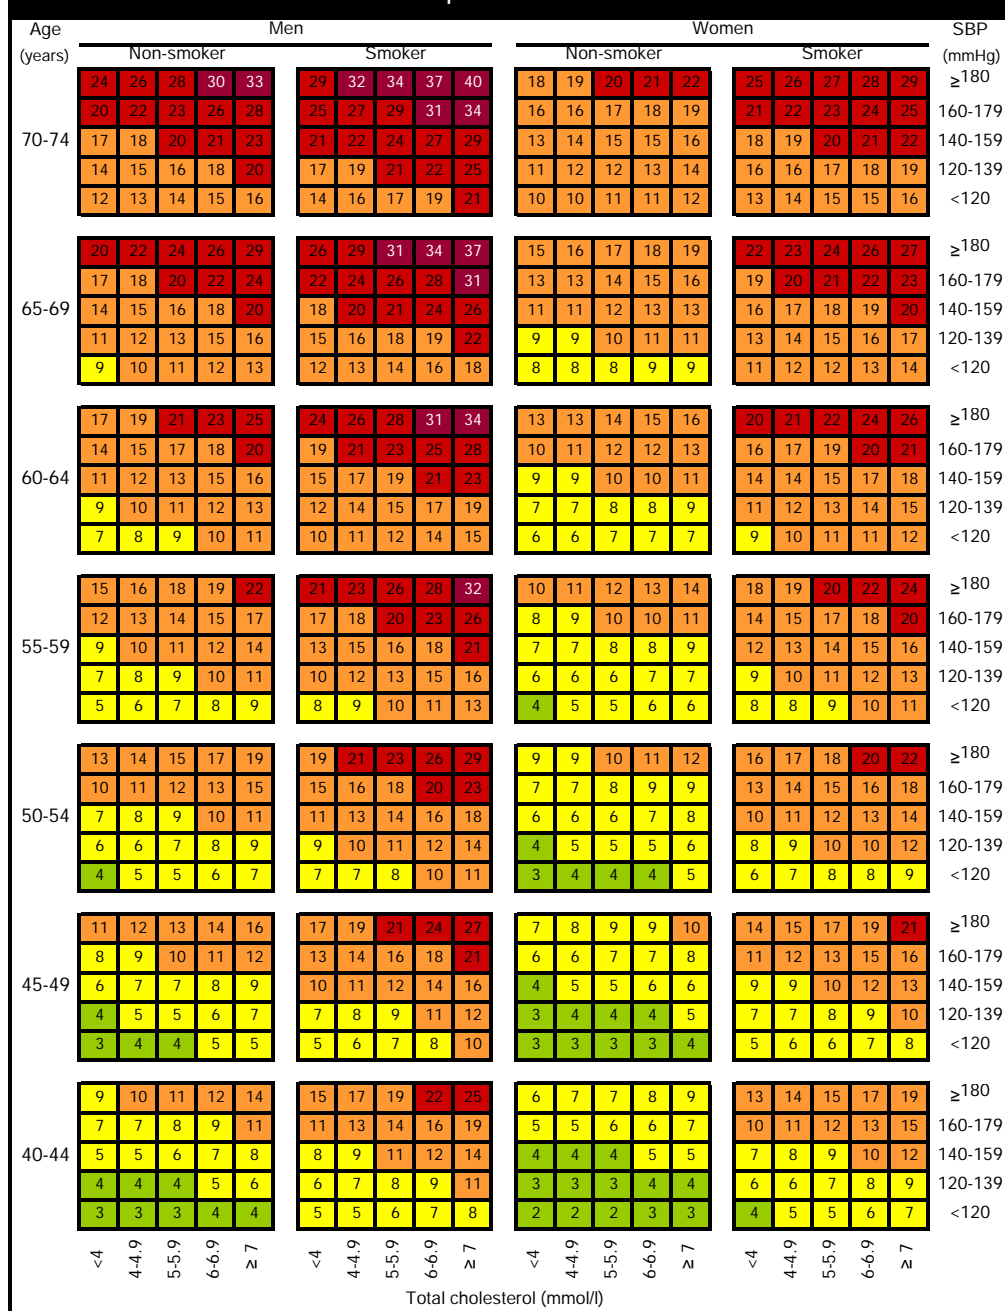

East Asia

Risk Level <5% 5% to <10% 10% to <20% 20% to <30% ≥30%

People without Diabetes

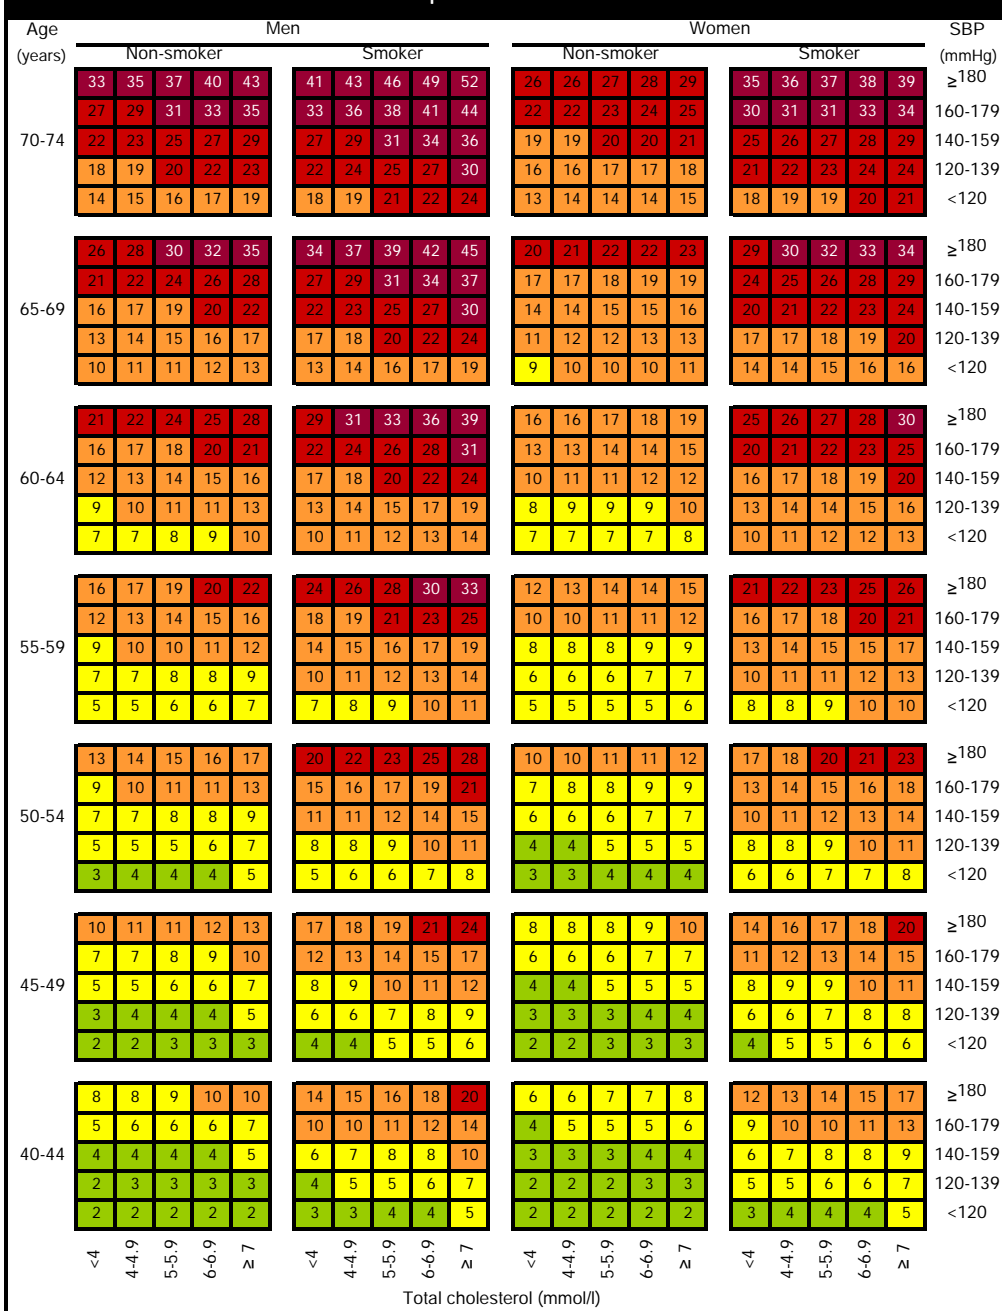

East Asia

Risk Level <5% 5% to <10% 10% to <20% 20% to <30% ≥30%

People with Diabetes

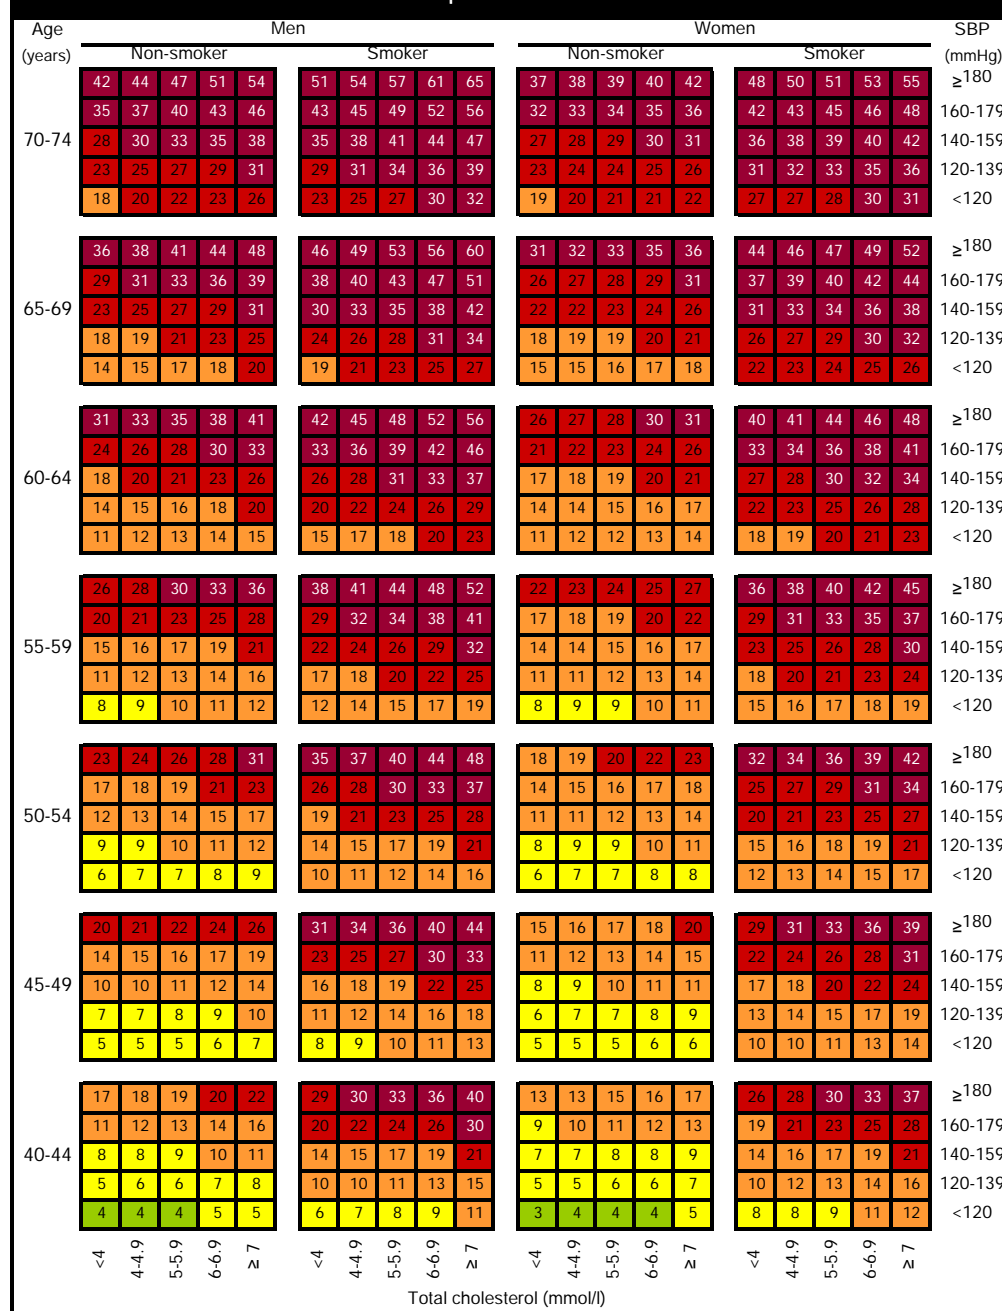

South Asia

Risk Level ■ <5% ■ 5% to <10% ■ 10% to <20% ■ 20% to <30% ■ ≥30%

People without Diabetes

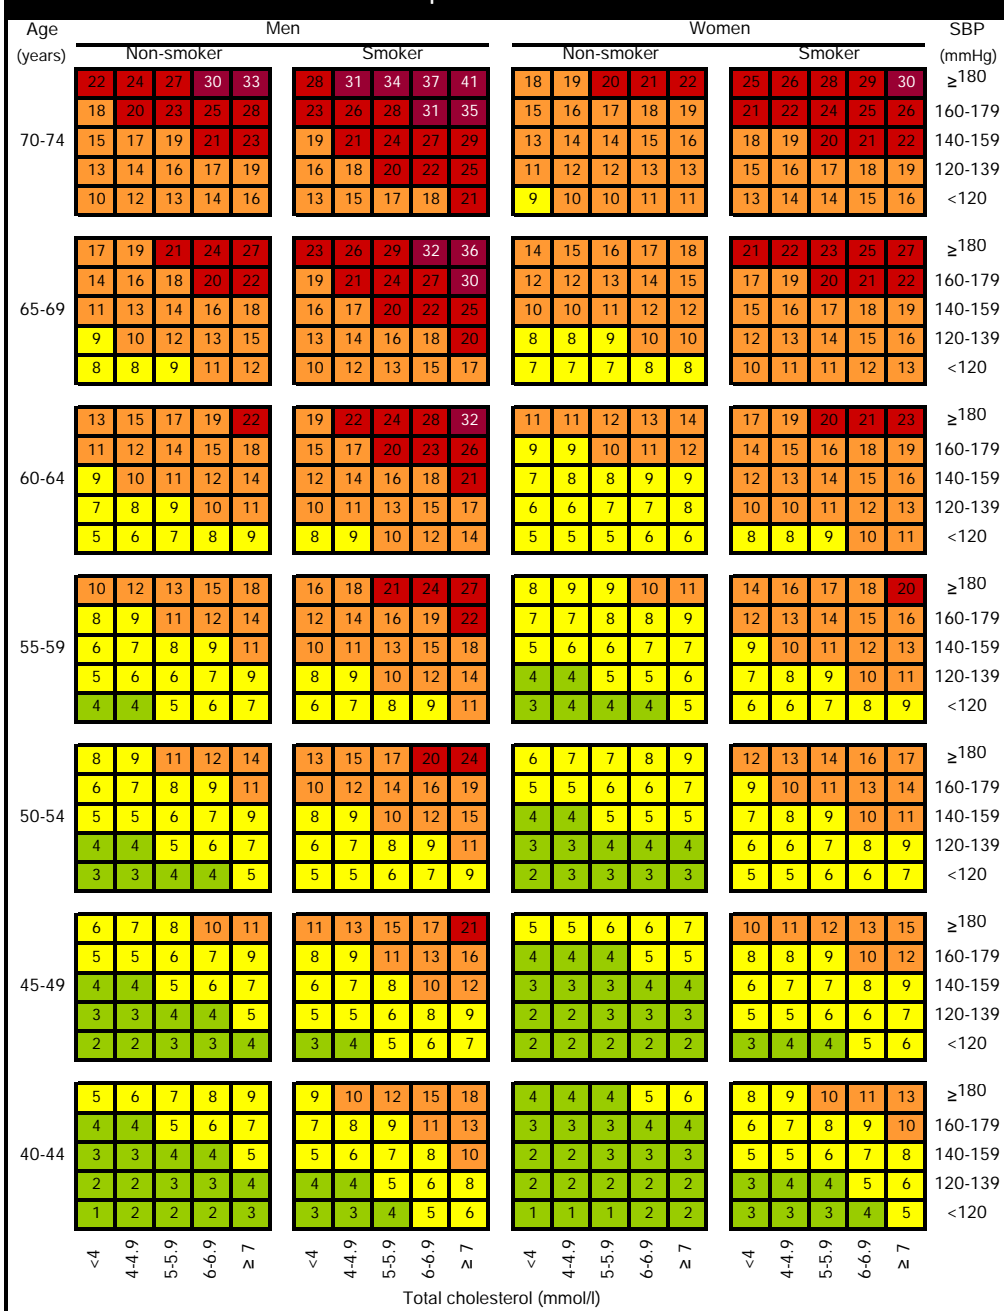

South Asia

Risk Level ■ <5% ■ 5% to <10% ■ 10% to <20% ■ 20% to <30% ■ ≥30%

People with Diabetes

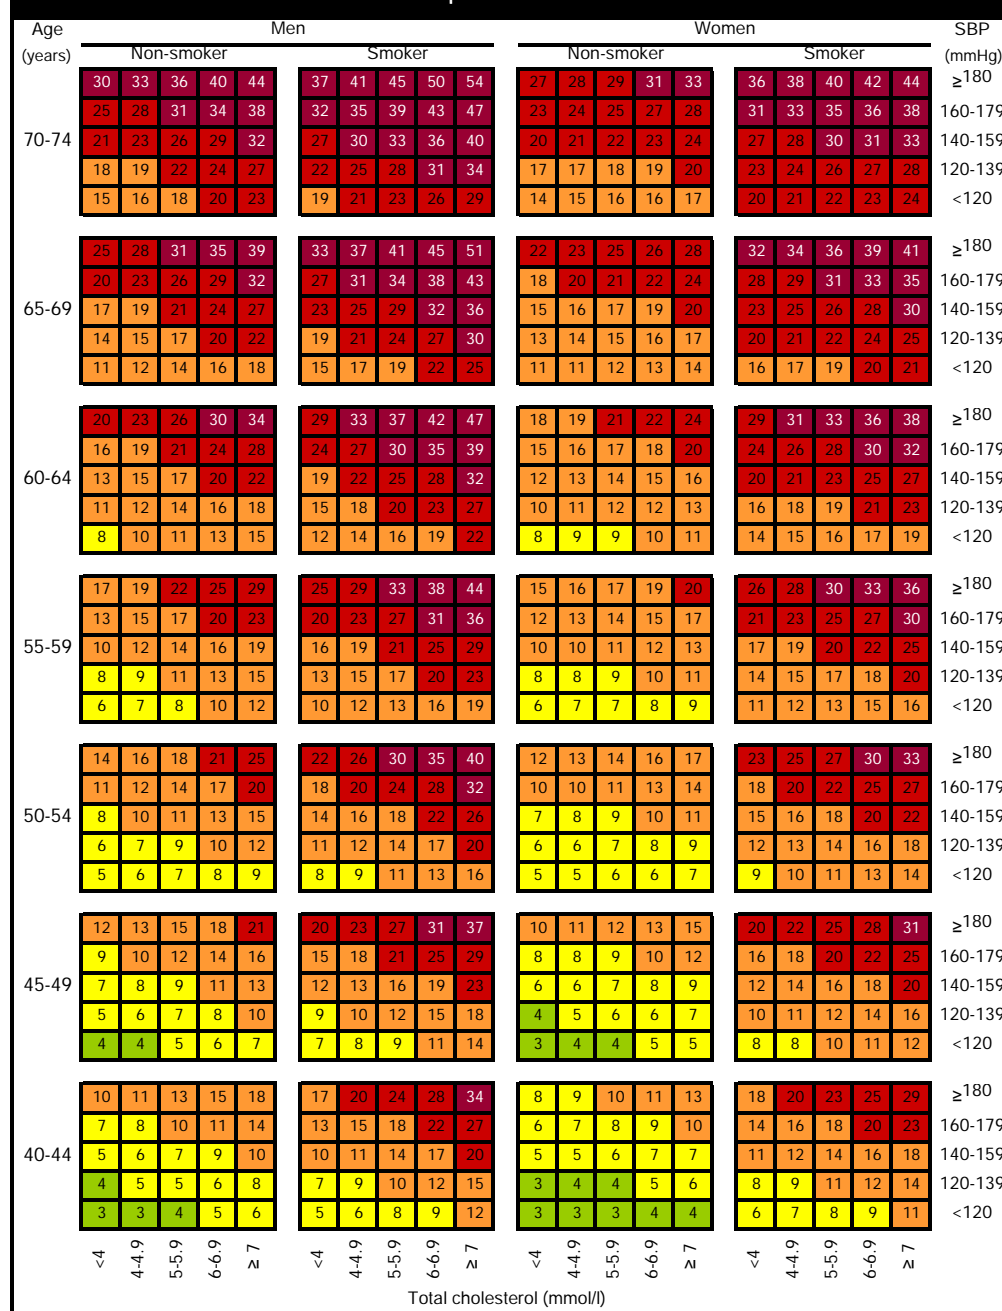

Southeast Asia

Risk Level ■ <5% ■ 5% to <10% ■ 10% to <20% ■ 20% to <30% ■ ≥30%

People without Diabetes

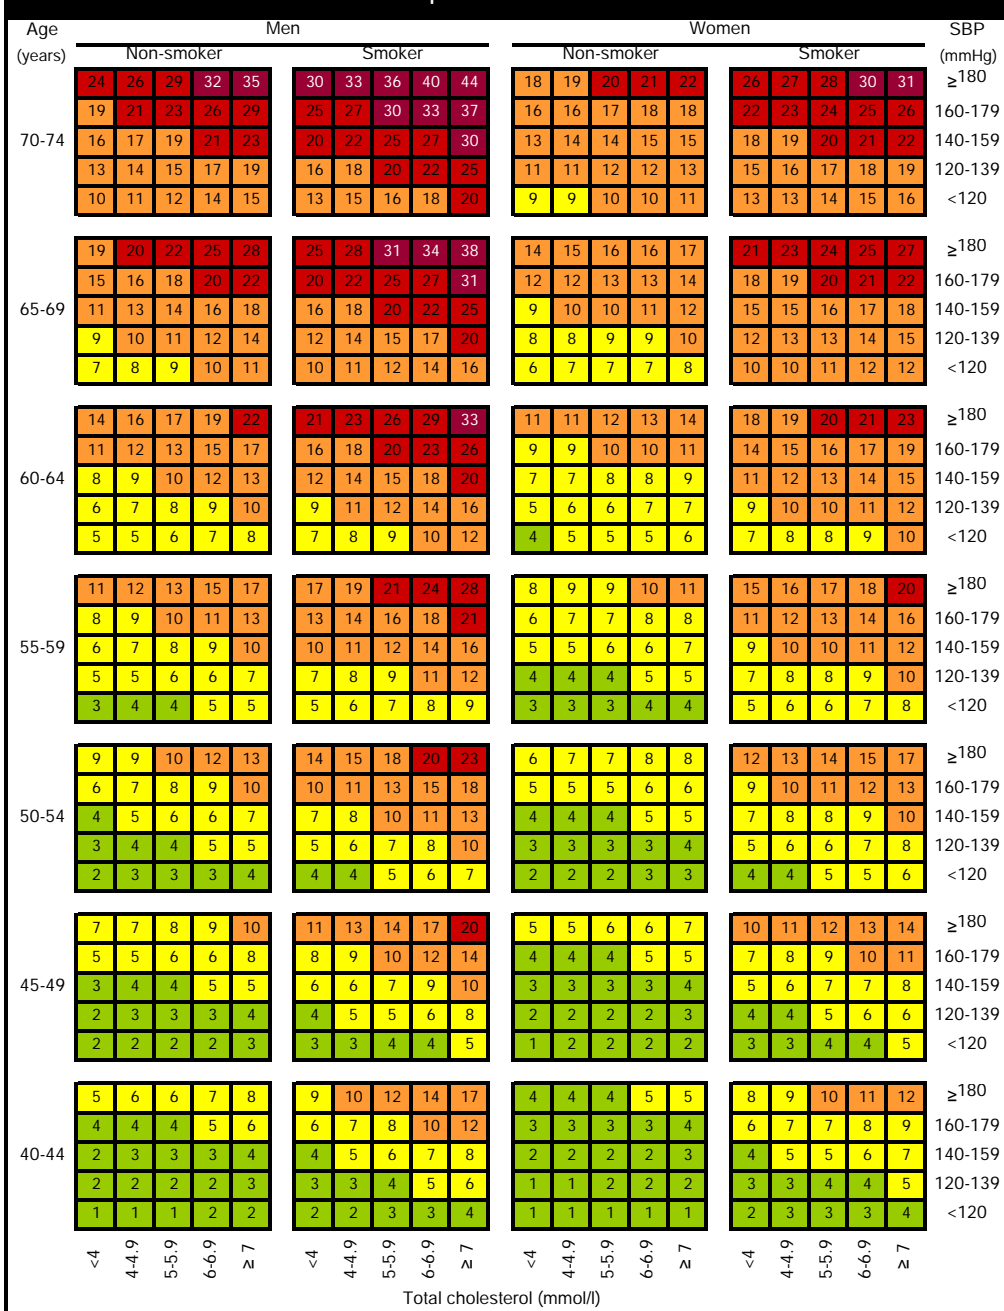

Southeast Asia

Risk Level ■ <5% ■ 5% to <10% ■ 10% to <20% ■ 20% to <30% ■ ≥30%

People with Diabetes

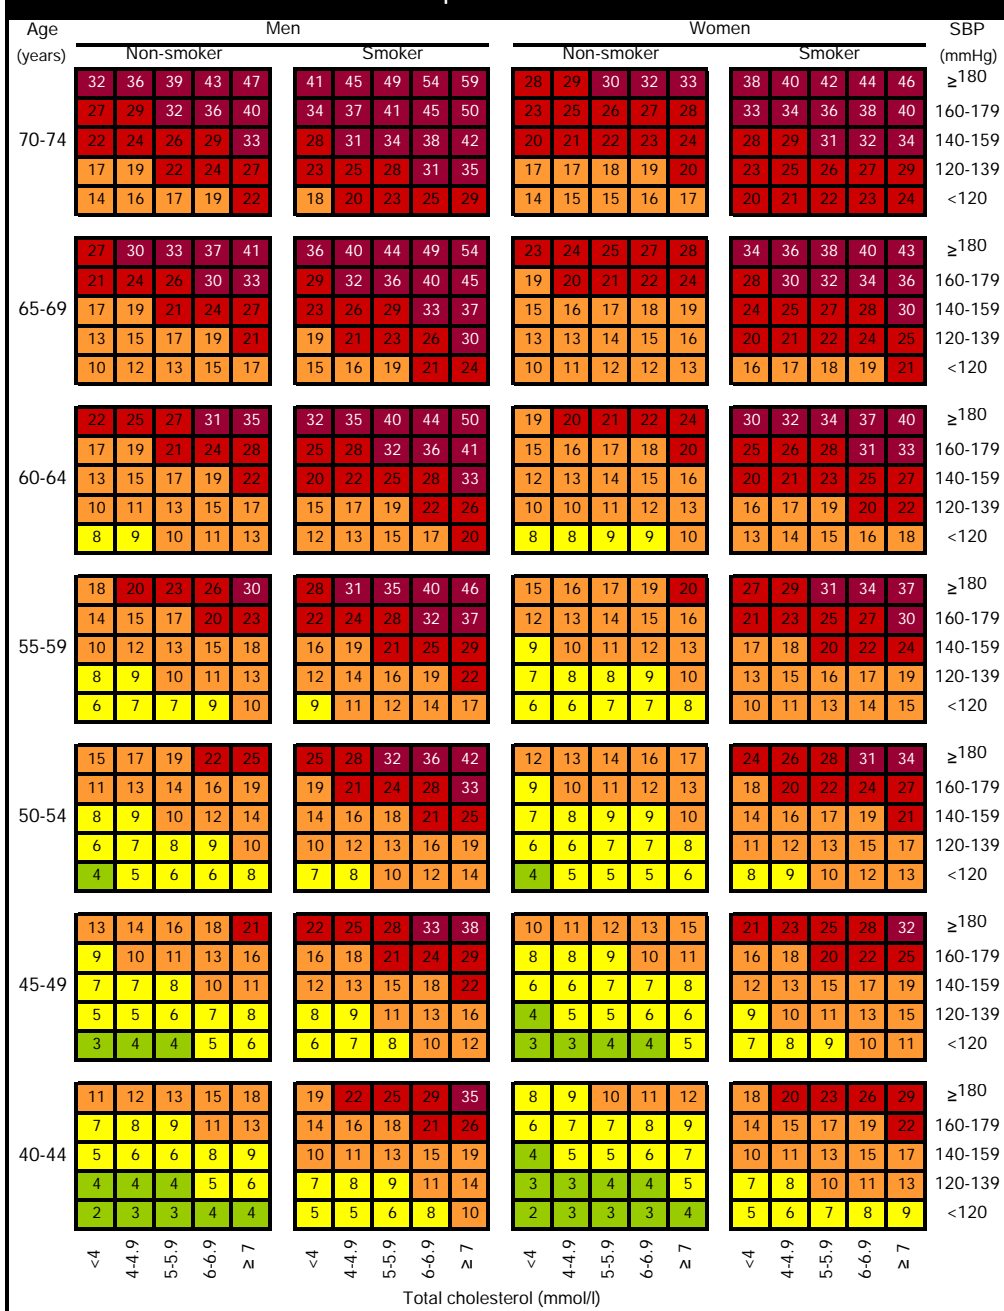



Central Asia

Risk Level <5% 5% to <10% 10% to <20% 20% to <30% ≥30%

People without Diabetes

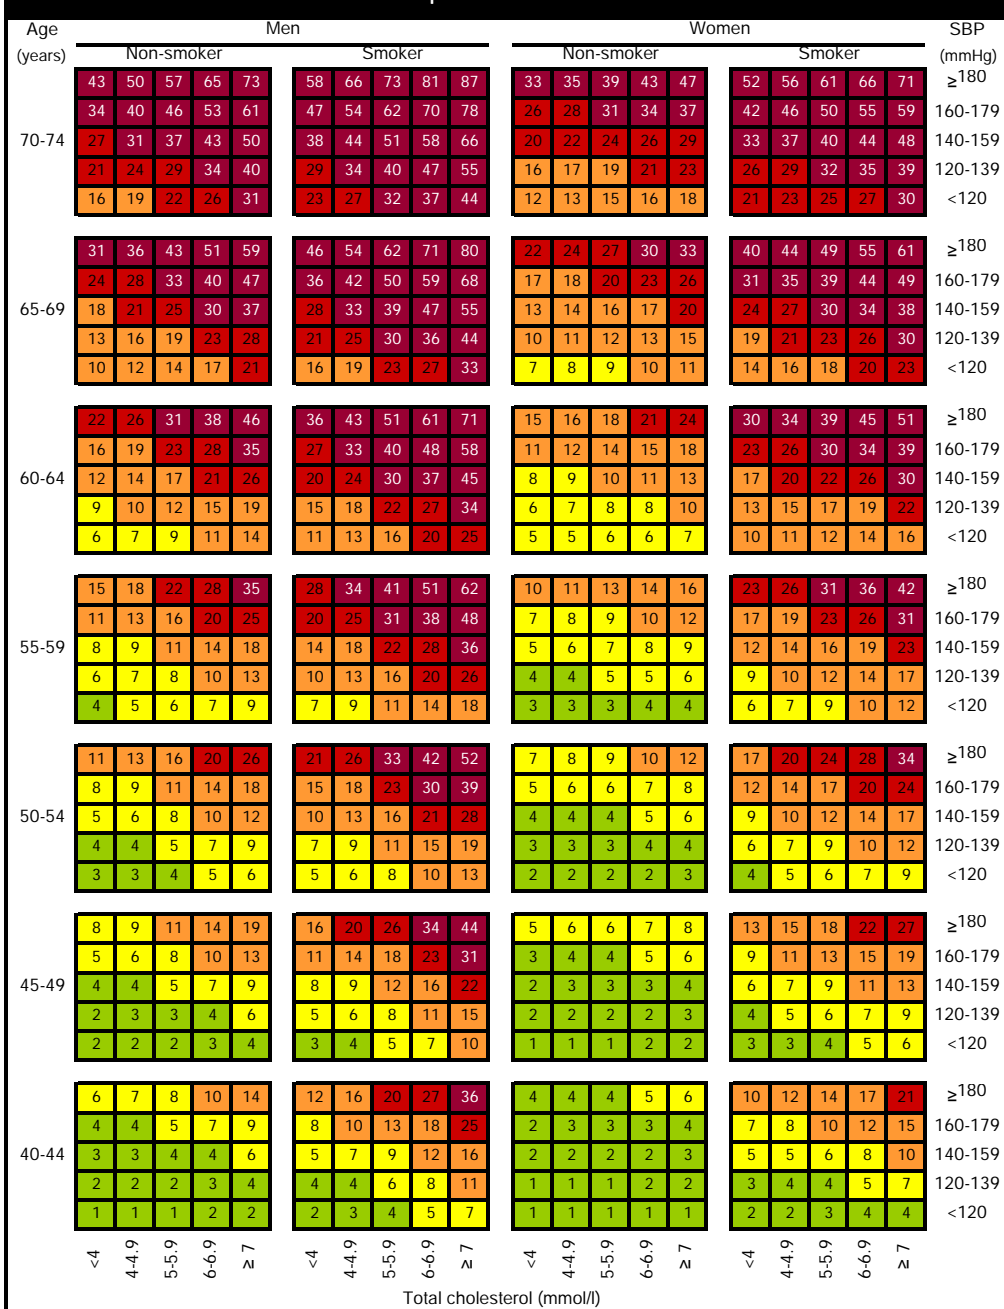

Central Asia

Risk Level <5% 5% to <10% 10% to <20% 20% to <30% ≥30%

People with Diabetes

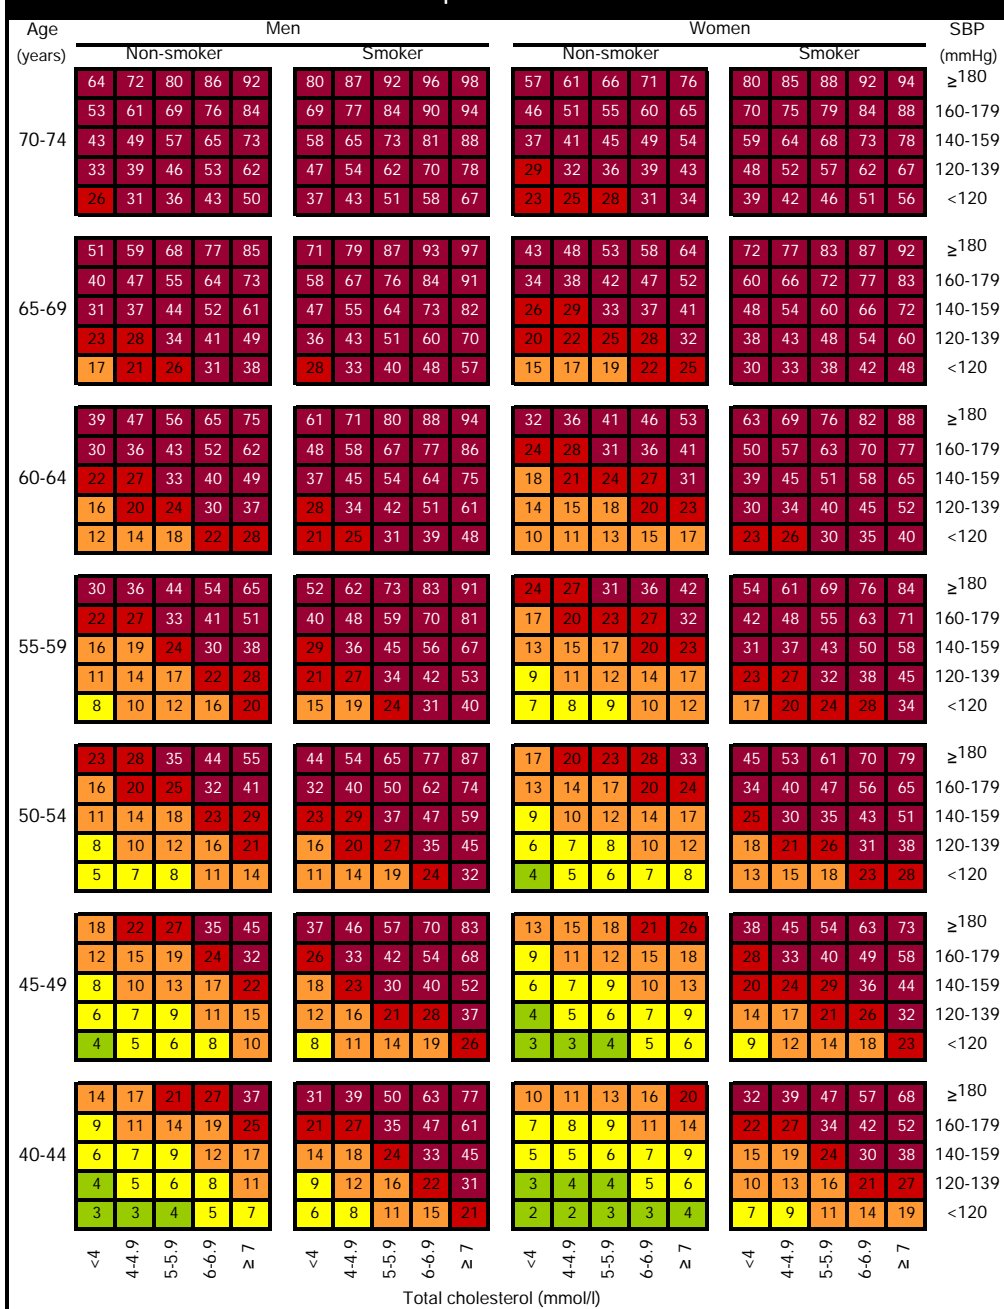

### High-income Asia Pacific

Risk Level ■ <5% ■ 5% to <10% ■ 10% to <20% ■ 20% to <30% ■ ≥30%

#### People without Diabetes

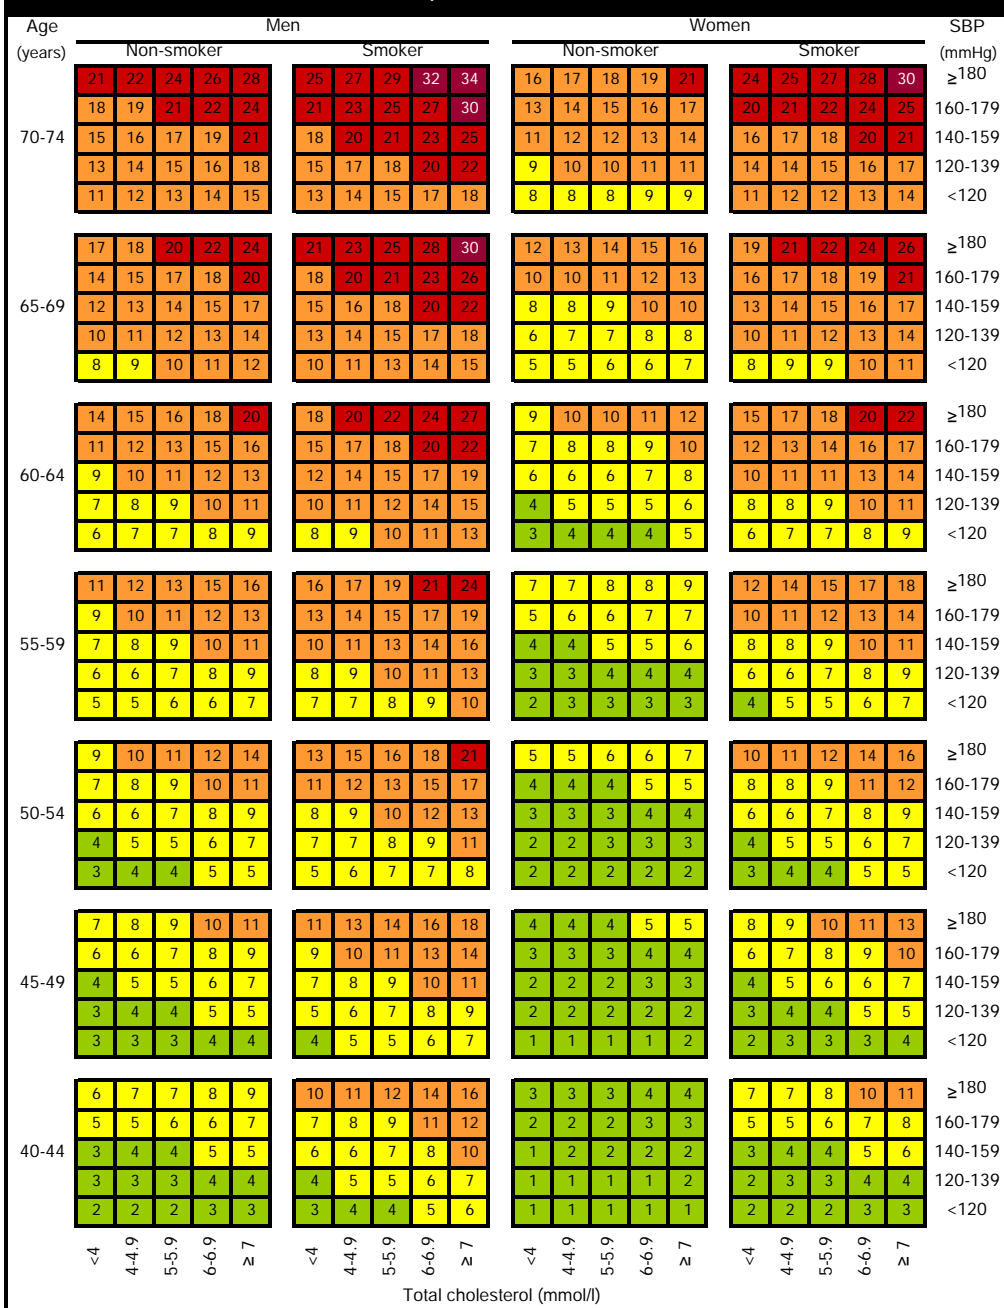

### High-income Asia Pacific

Risk Level ■ <5% ■ 5% to <10% ■ 10% to <20% ■ 20% to <30% ■ ≥30%

#### People with Diabetes

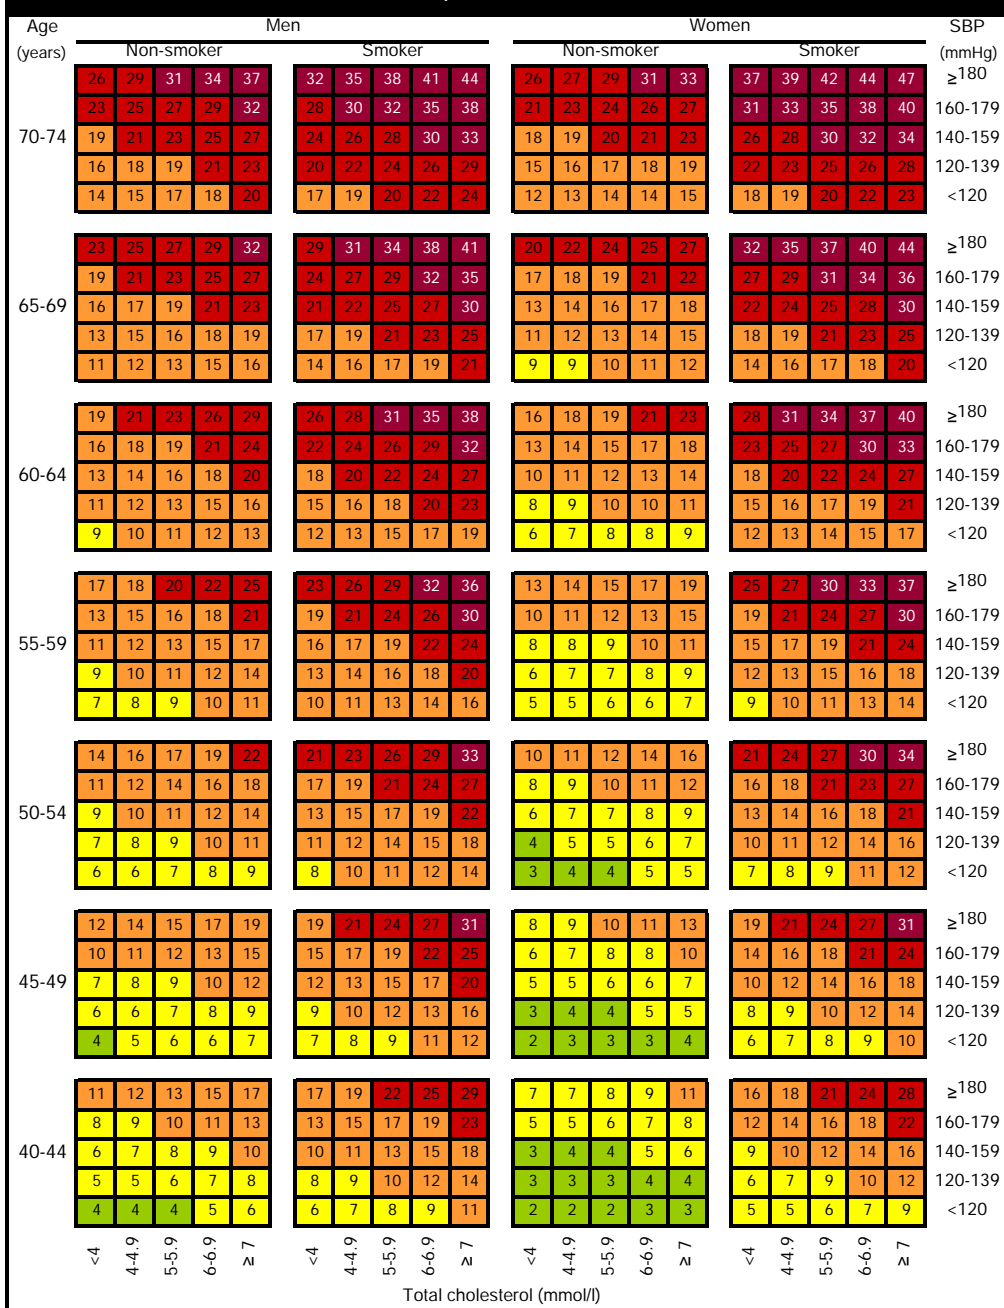

Western Europe

Risk Level ■ <5% ■ 5% to <10% ■ 10% to <20% ■ 20% to <30% ■ ≥30%

People without Diabetes

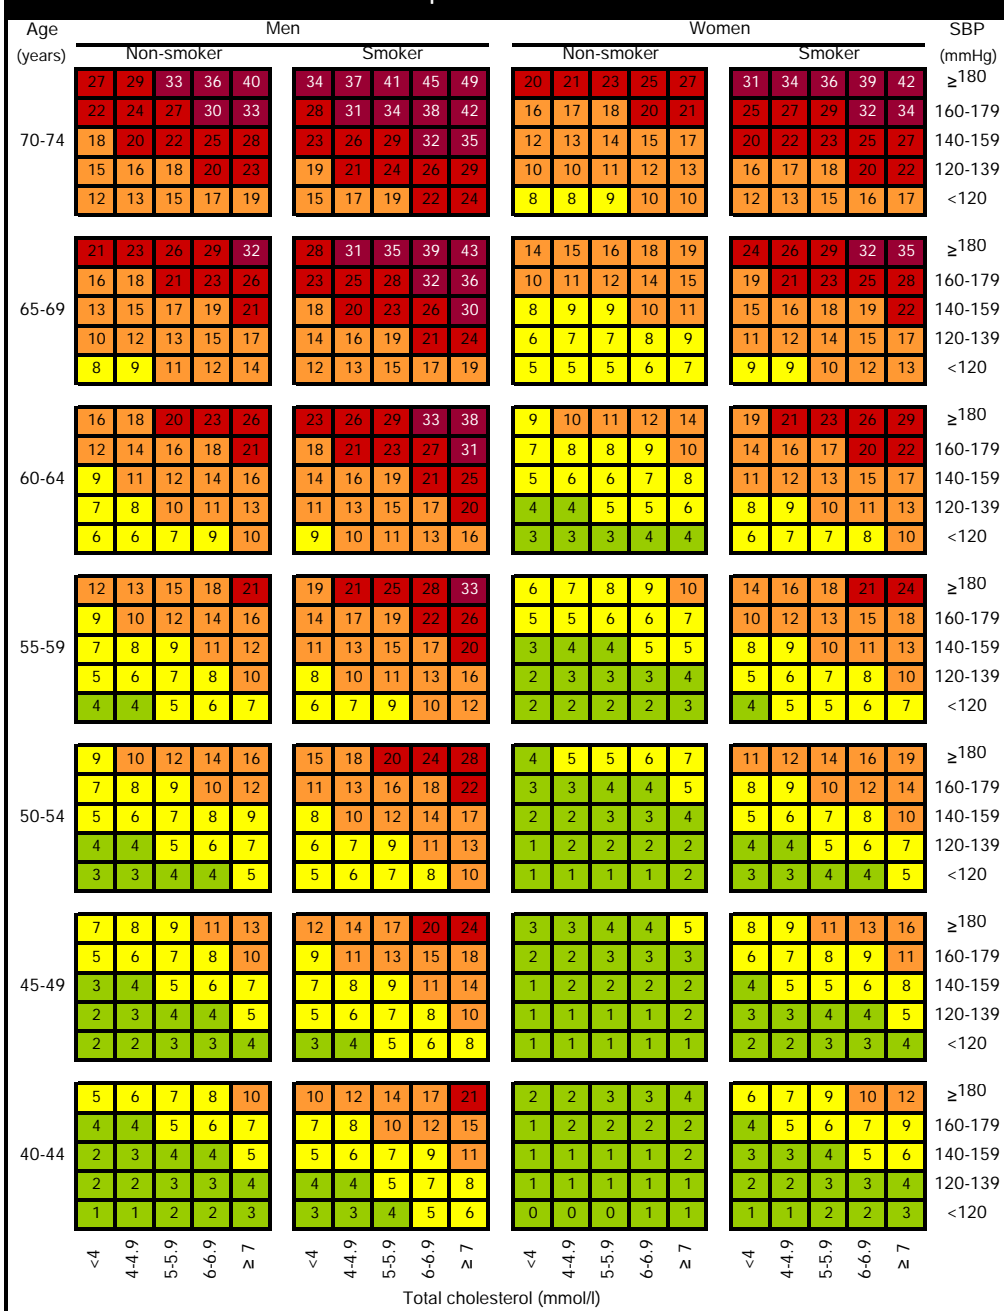

Western Europe

Risk Level ■ <5% ■ 5% to <10% ■ 10% to <20% ■ 20% to <30% ■ ≥30%

People with Diabetes

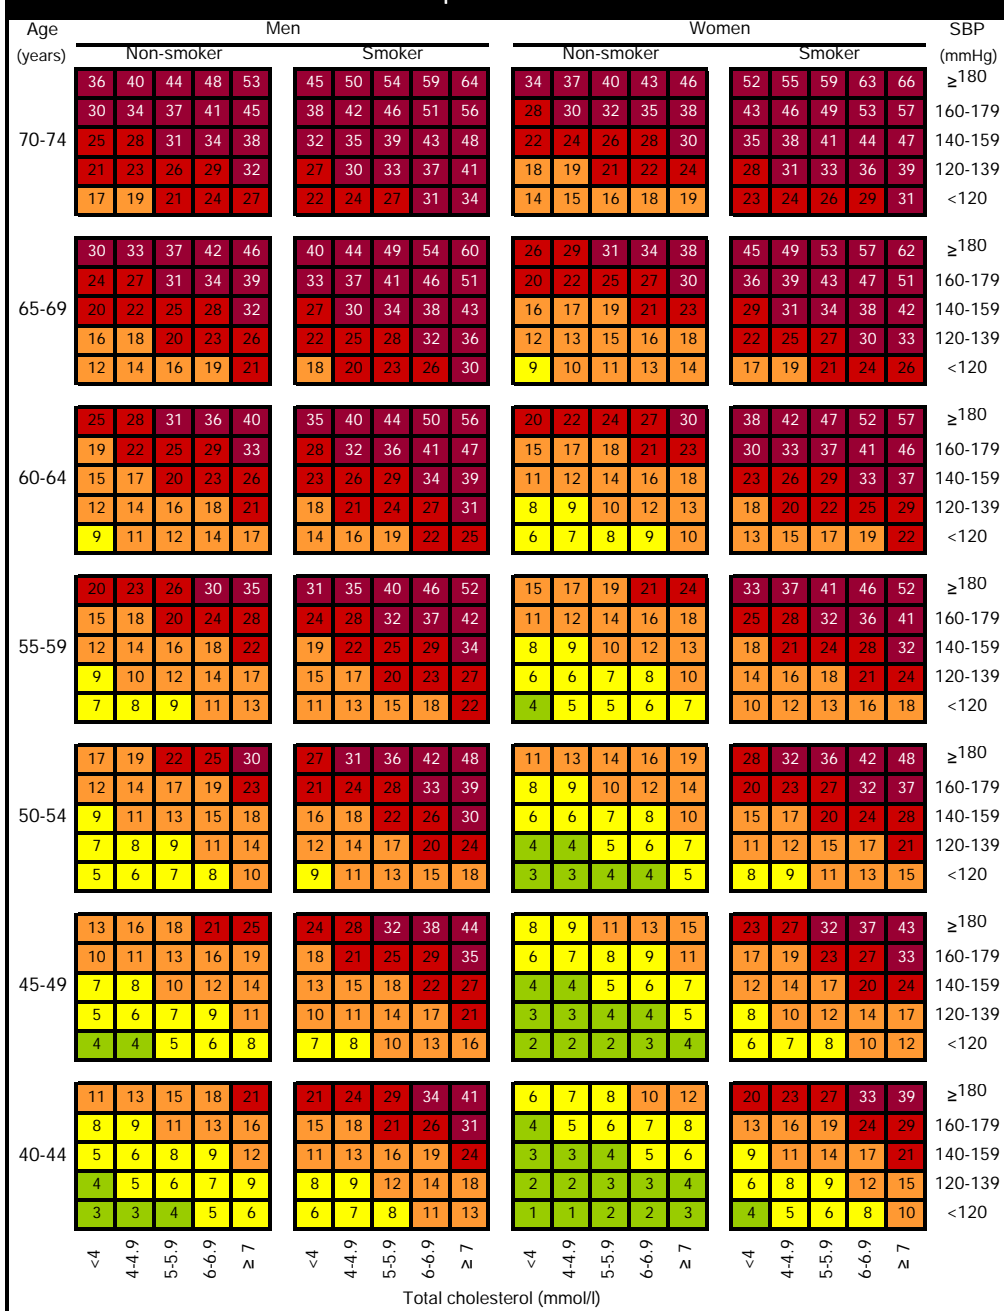

Central Europe

Risk Level ■ <5% ■ 5% to <10% ■ 10% to <20% ■ 20% to <30% ■ ≥30%

People without Diabetes

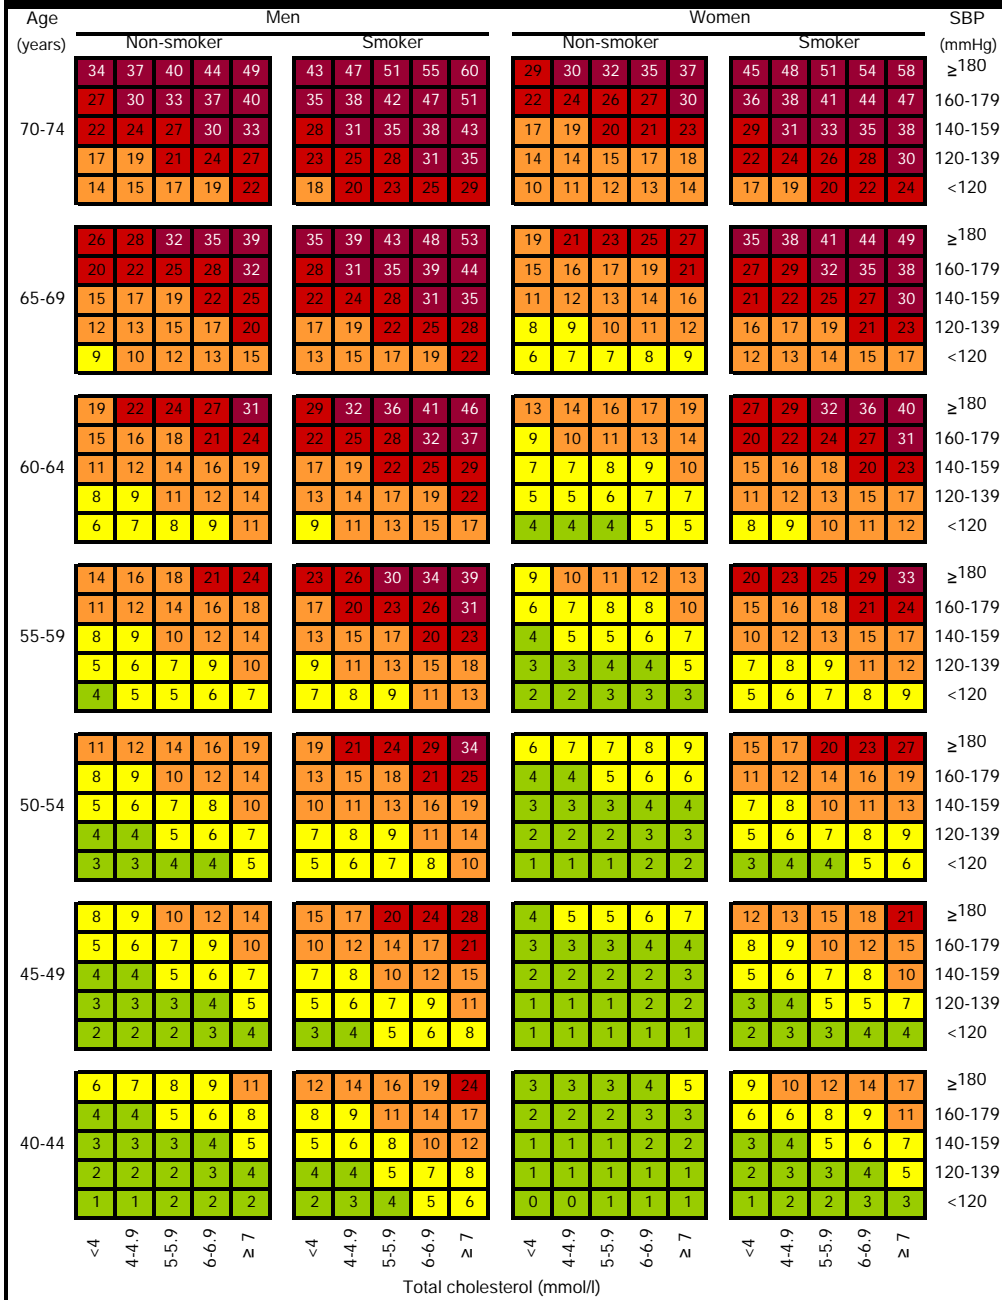

Central Europe

Risk Level ■ <5% ■ 5% to <10% ■ 10% to <20% ■ 20% to <30% ■ ≥30%

People with Diabetes

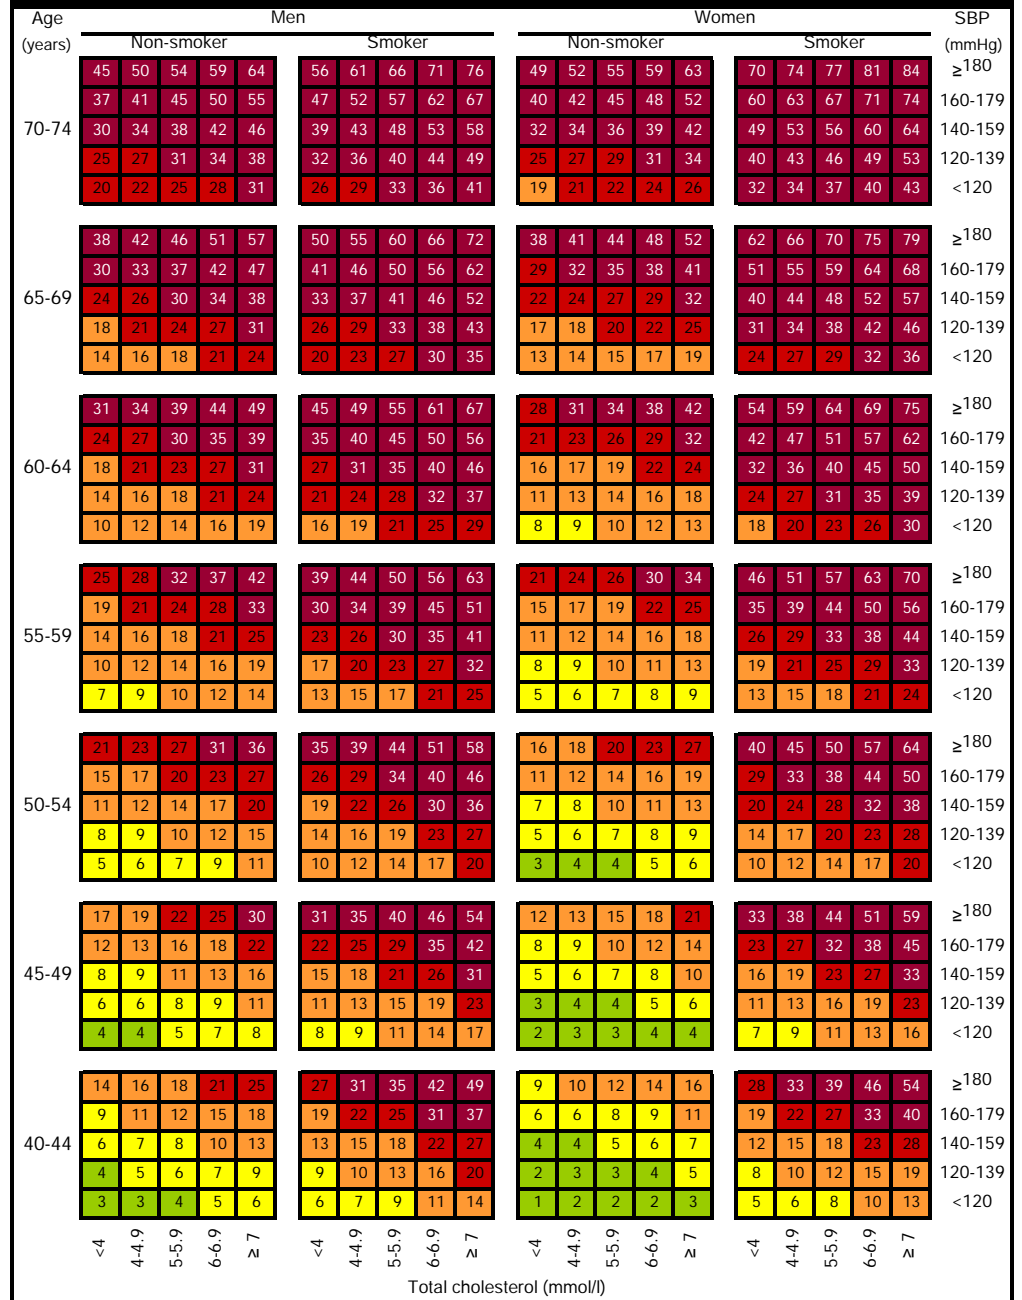

### Eastern Europe

Risk Level ■ <5% ■ 5% to <10% ■ 10% to <20% ■ 20% to <30% ■ ≥30%

#### People without Diabetes

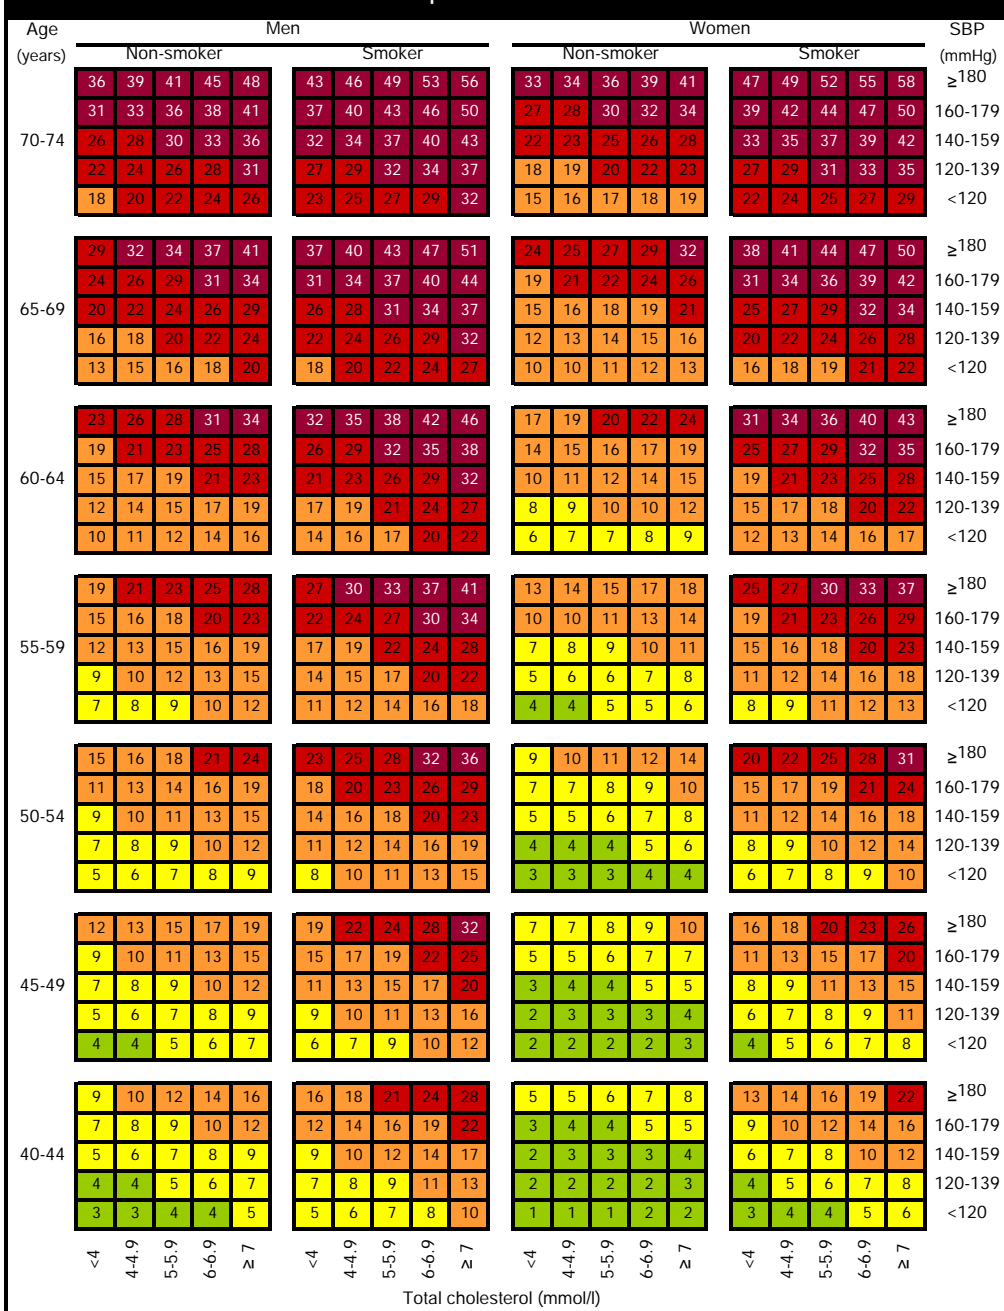

### Eastern Europe

Risk Level ■ <5% ■ 5% to <10% ■ 10% to <20% ■ 20% to <30% ■ ≥30%

#### People with Diabetes

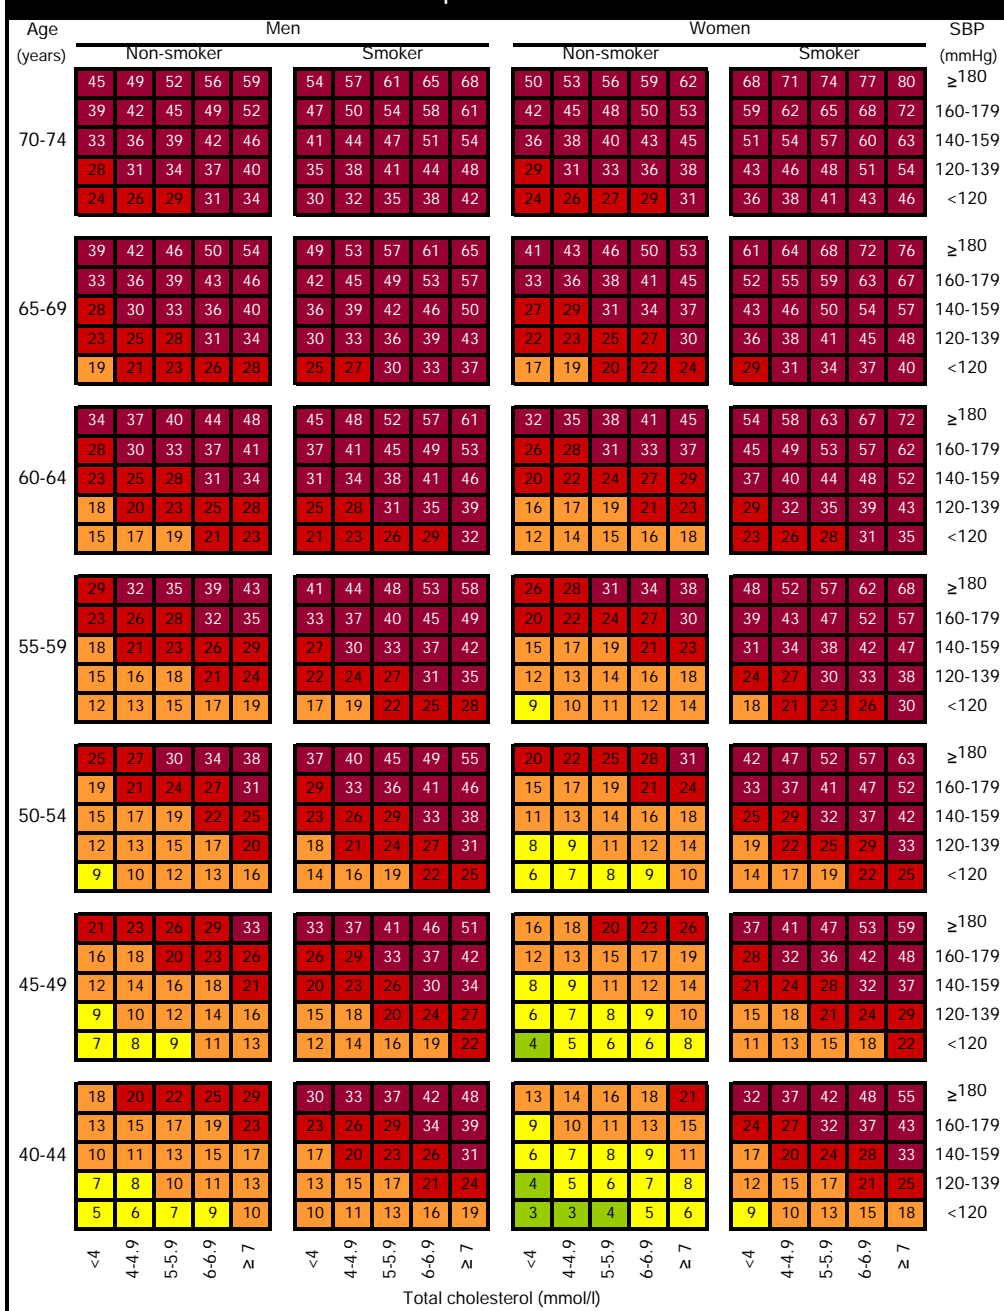

### Oceania

Risk Level ■ <5% ■ 5% to <10% ■ 10% to <20% ■ 20% to <30% ■ ≥30%

#### People without Diabetes

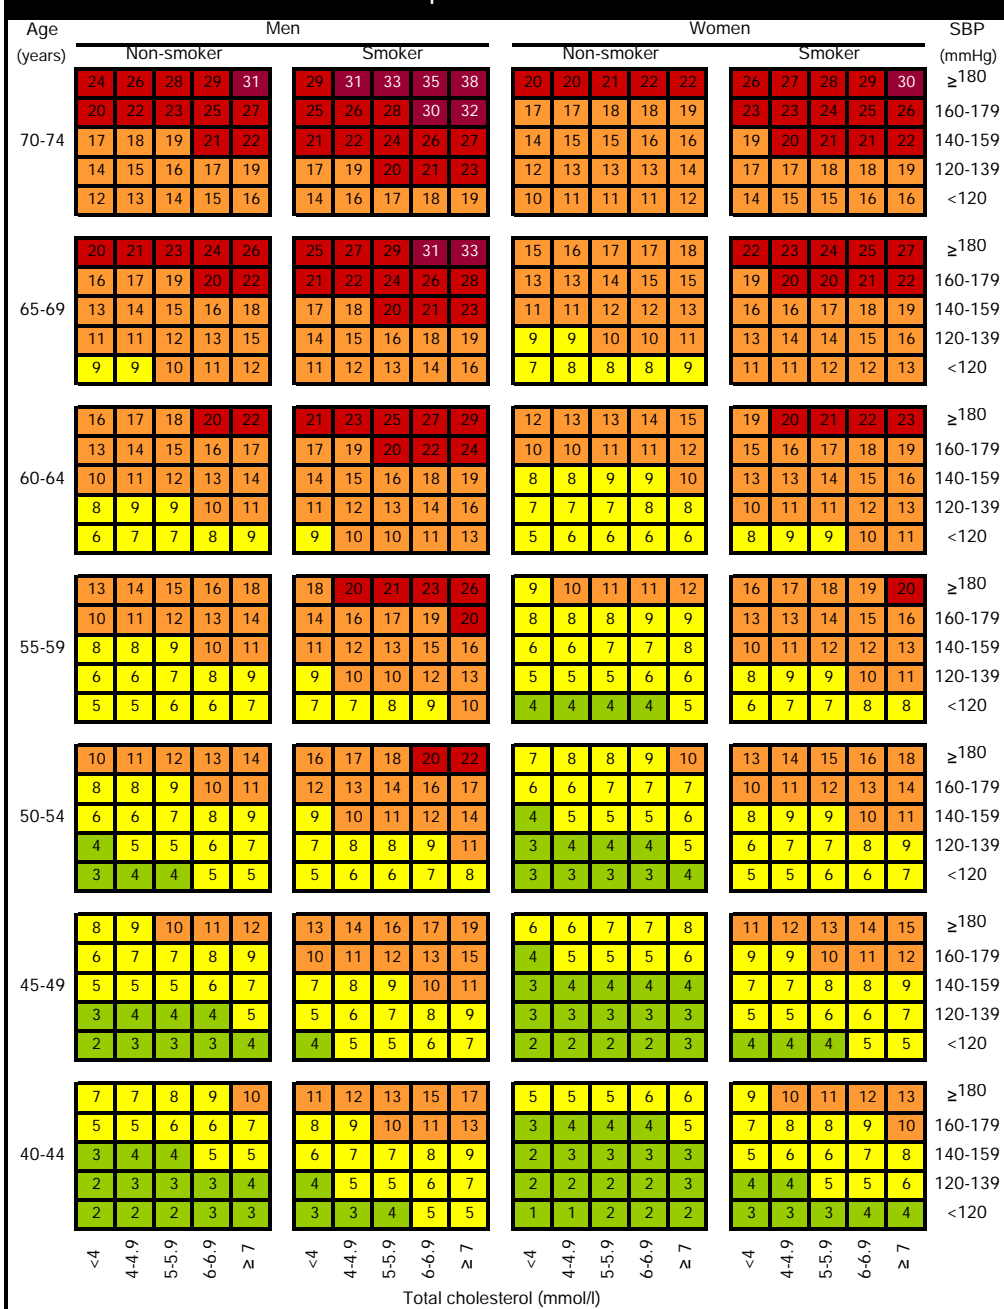

### Oceania

Risk Level ■ <5% ■ 5% to <10% ■ 10% to <20% ■ 20% to <30% ■ ≥30%

#### People with Diabetes

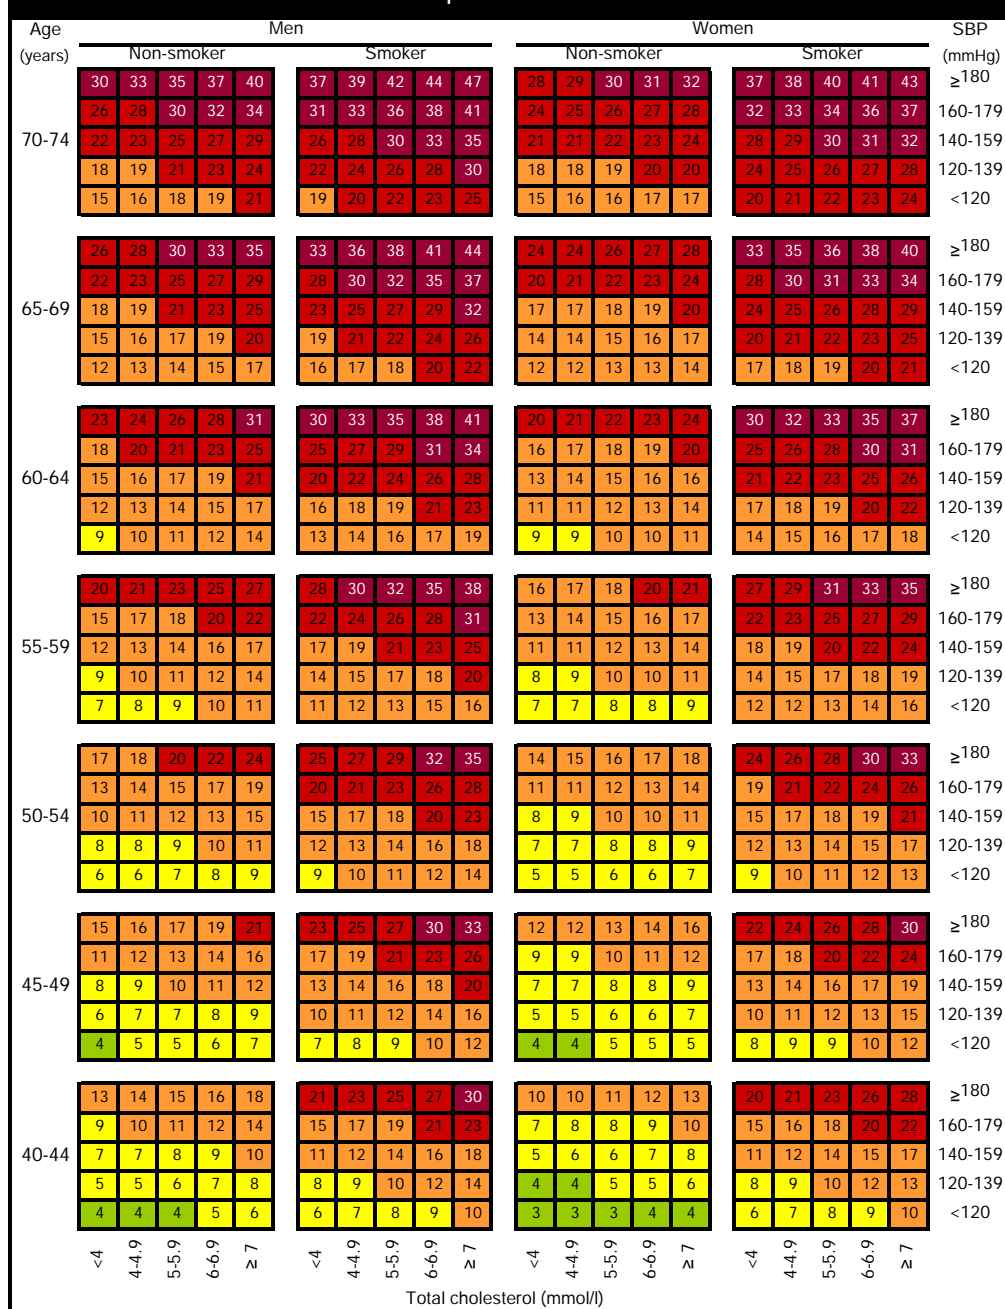

Australasia

Risk Level ■ <5% ■ 5% to <10% ■ 10% to <20% ■ 20% to <30% ■ ≥30%

People without Diabetes

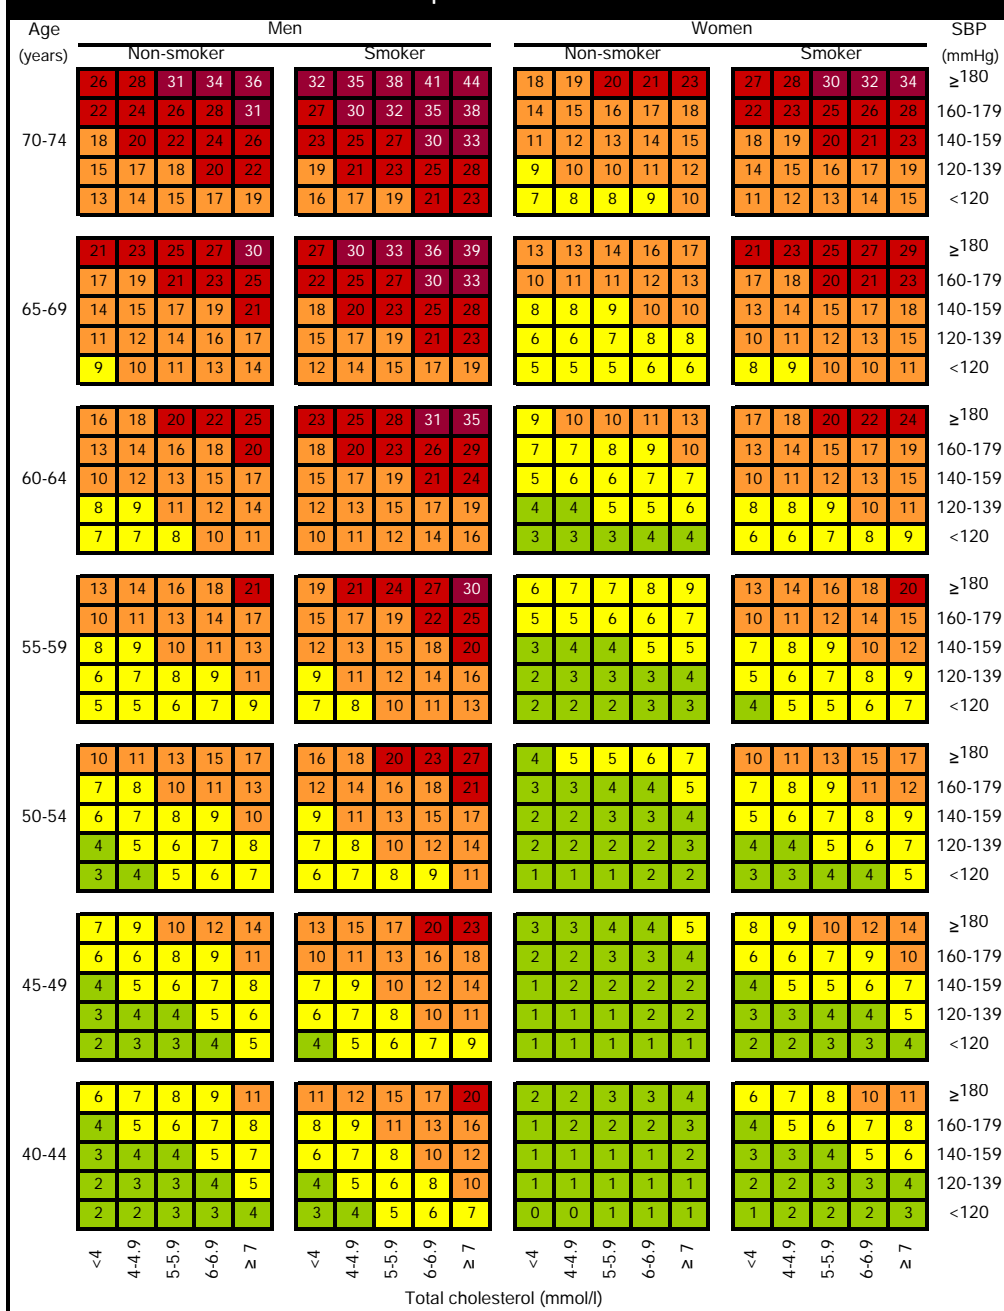

Australasia

Risk Level ■ <5% ■ 5% to <10% ■ 10% to <20% ■ 20% to <30% ■ ≥30%

People with Diabetes

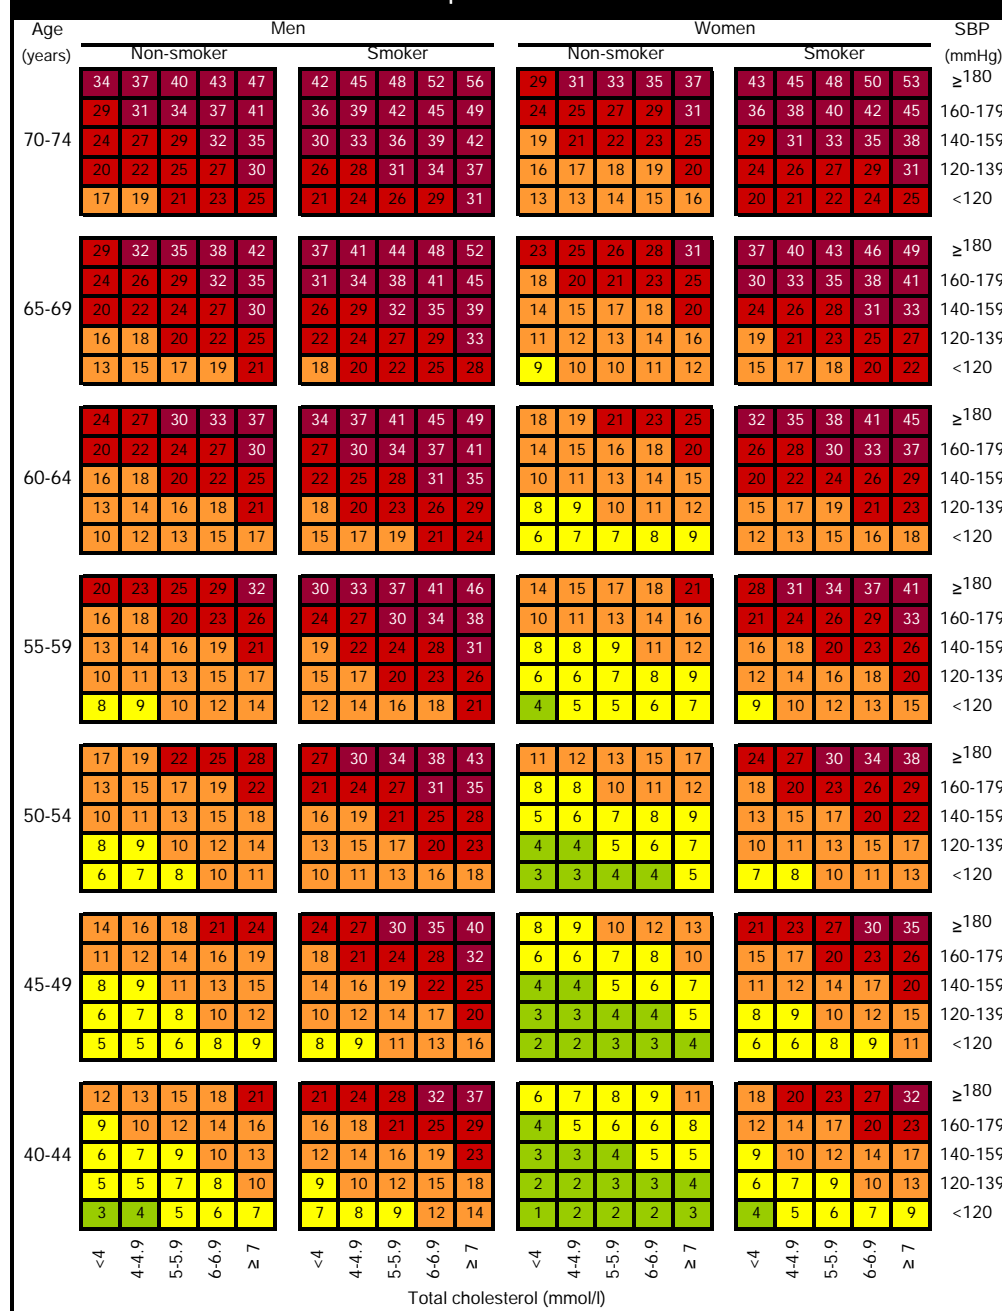

## WHO cardiovascular disease risk non-laboratory-based charts



### North Africa and Middle East

Risk Level ■ <5% ■ 5% to <10% ■ 10% to <20% ■ 20% to <30% ■ ≥30%

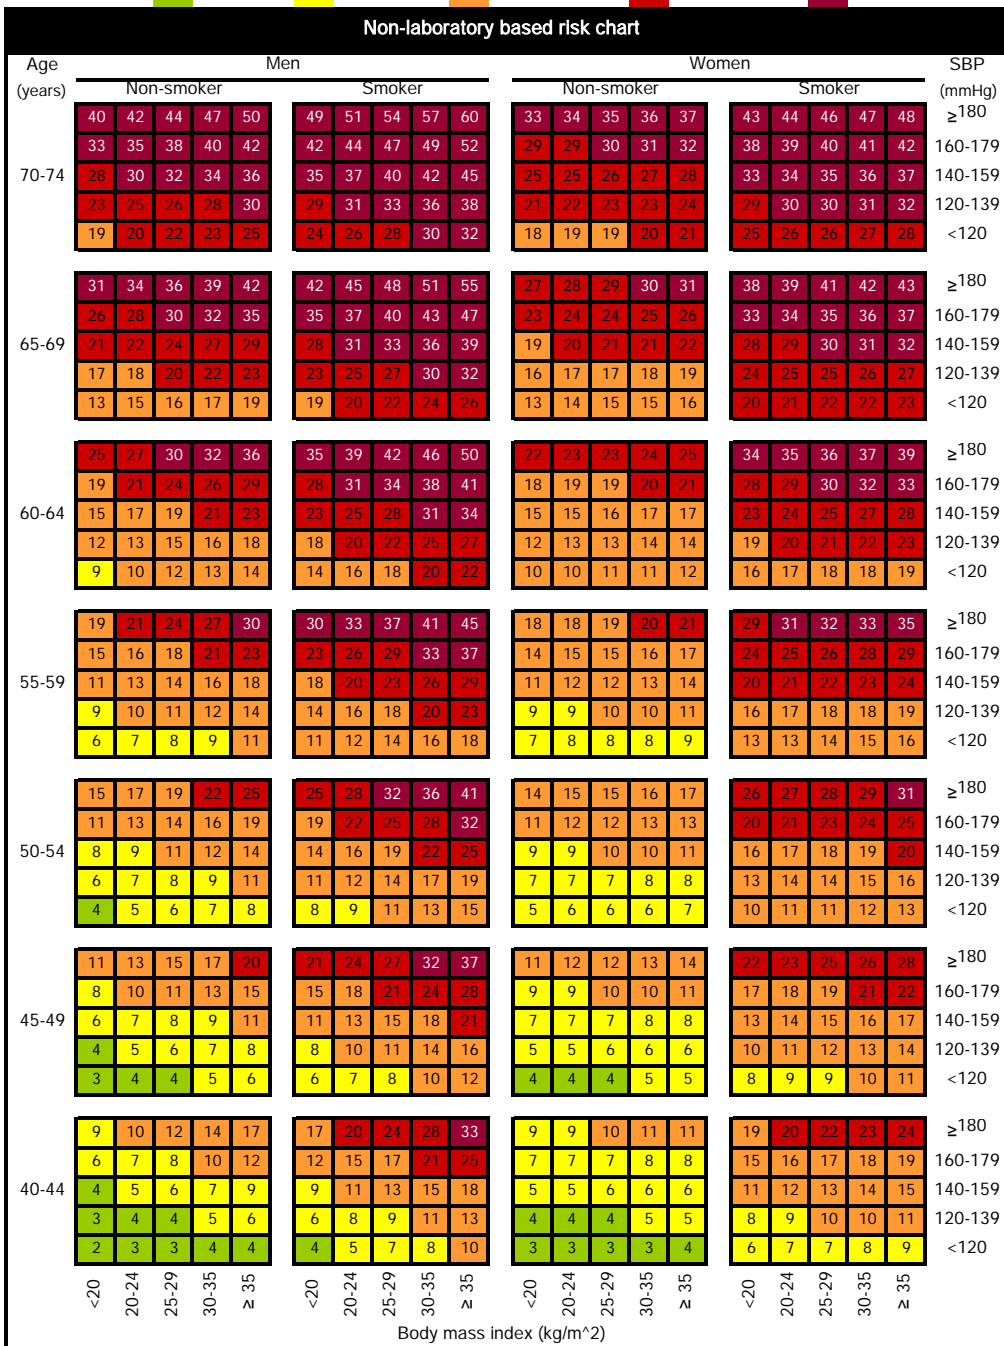

Central Sub-Saharan Africa

Risk Level ■ <5% ■ 5% to <10% ■ 10% to <20% ■ 20% to <30% ■ ≥30%

Non-laboratory based risk chart

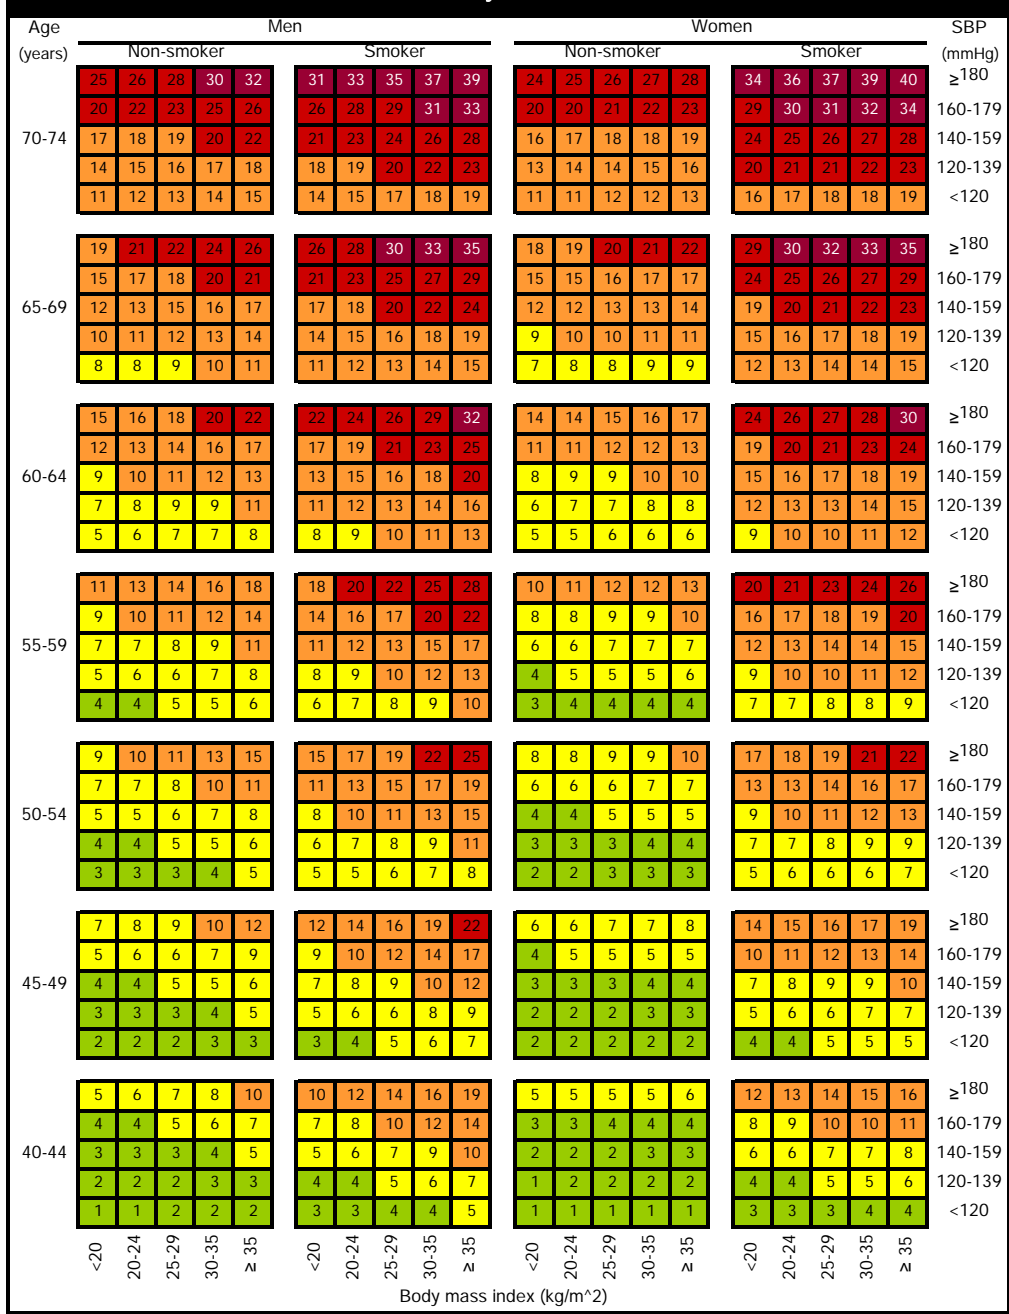

### Eastern Sub-Saharan Africa

Risk Level ■ <5% ■ 5% to <10% ■ 10% to <20% ■ 20% to <30% ■ ≥30%

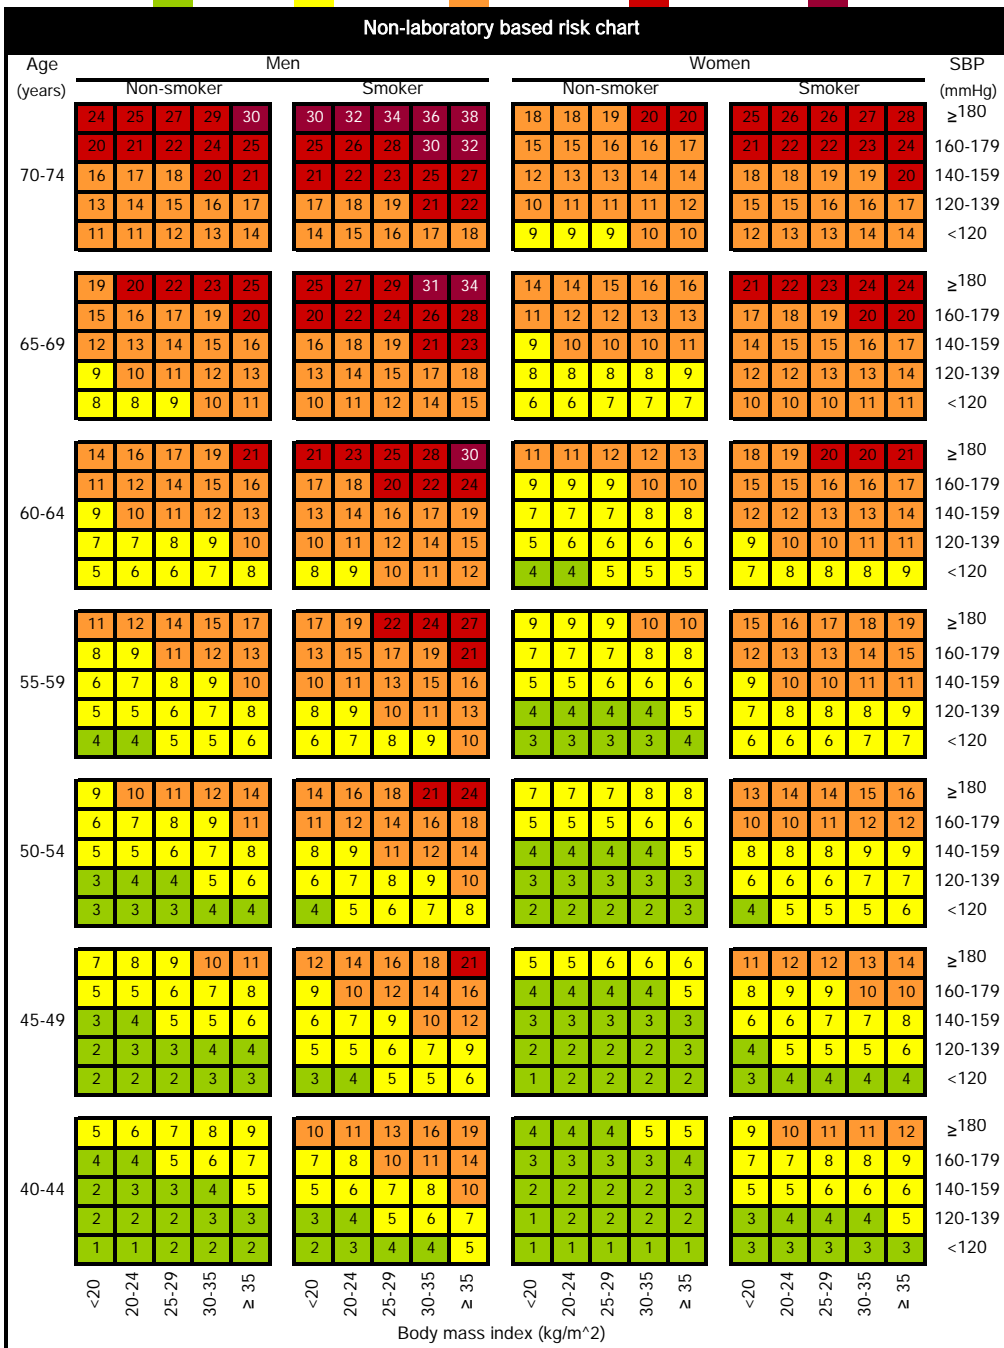

### Southern Sub-Saharan Africa

Risk Level ■ <5% ■ 5% to <10% ■ 10% to <20% ■ 20% to <30% ■ ≥30%

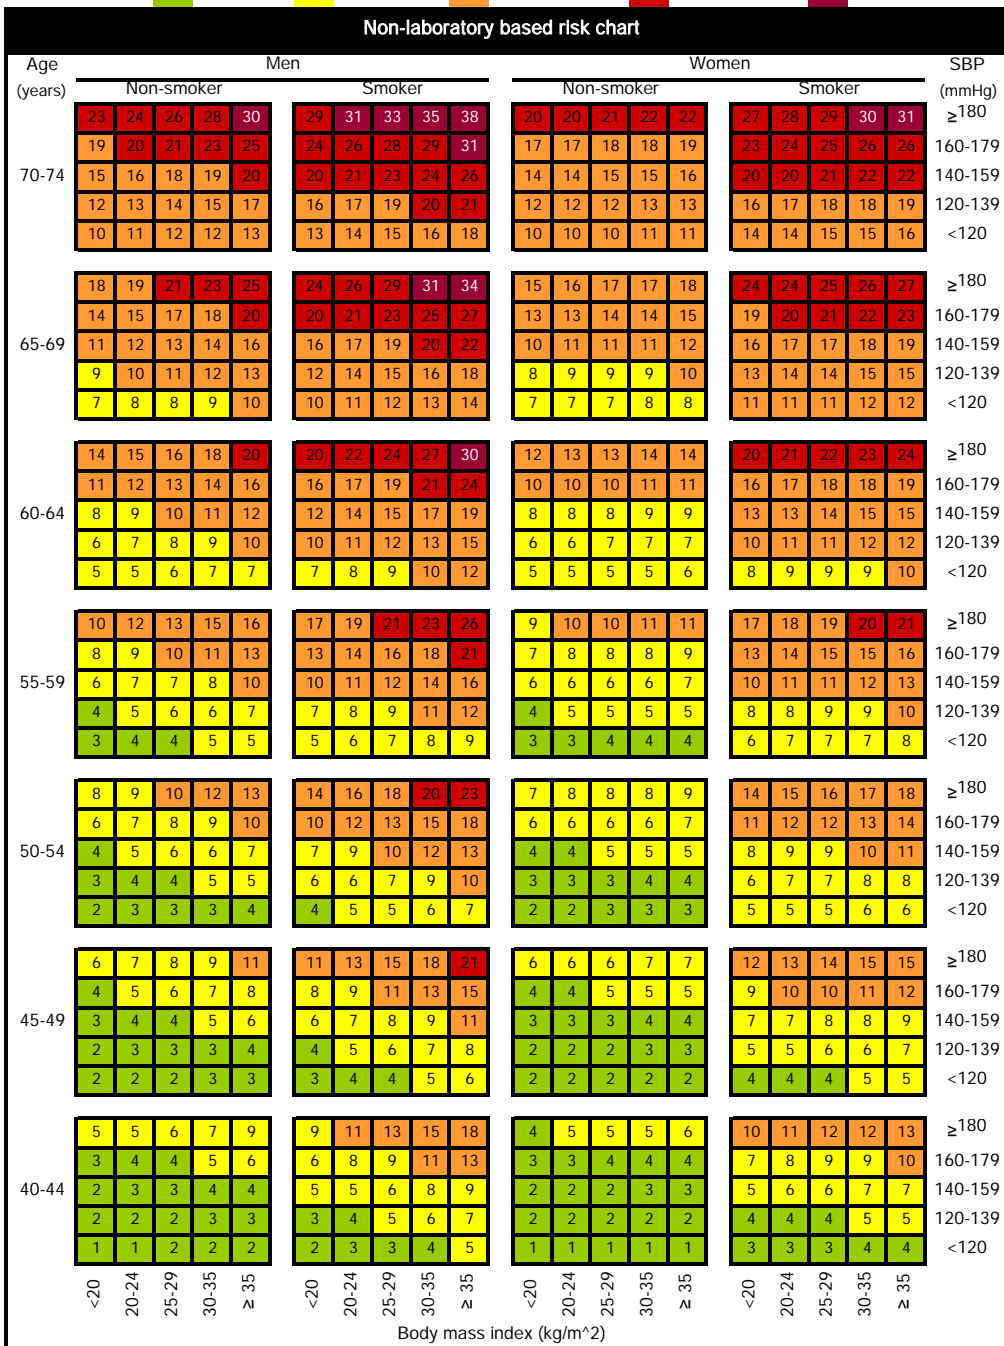

Western Sub-Saharan Africa

Risk Level ■ <5% ■ 5% to <10% ■ 10% to <20% ■ 20% to <30% ■ ≥30%

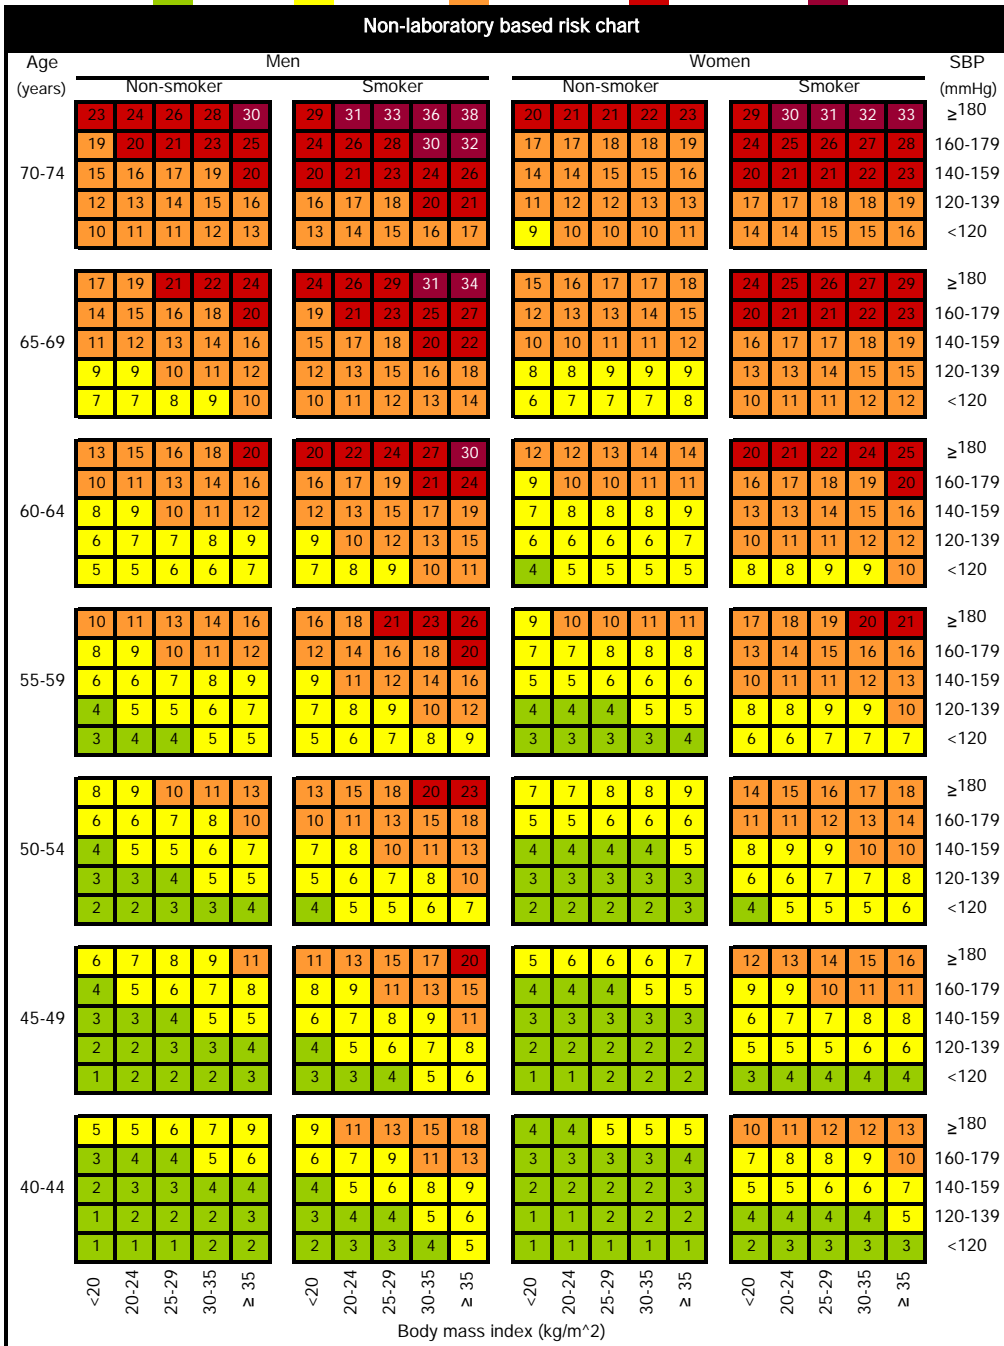

### Southern Latin America

Risk Level ■ <5% ■ 5% to <10% ■ 10% to <20% ■ 20% to <30% ■ ≥30%

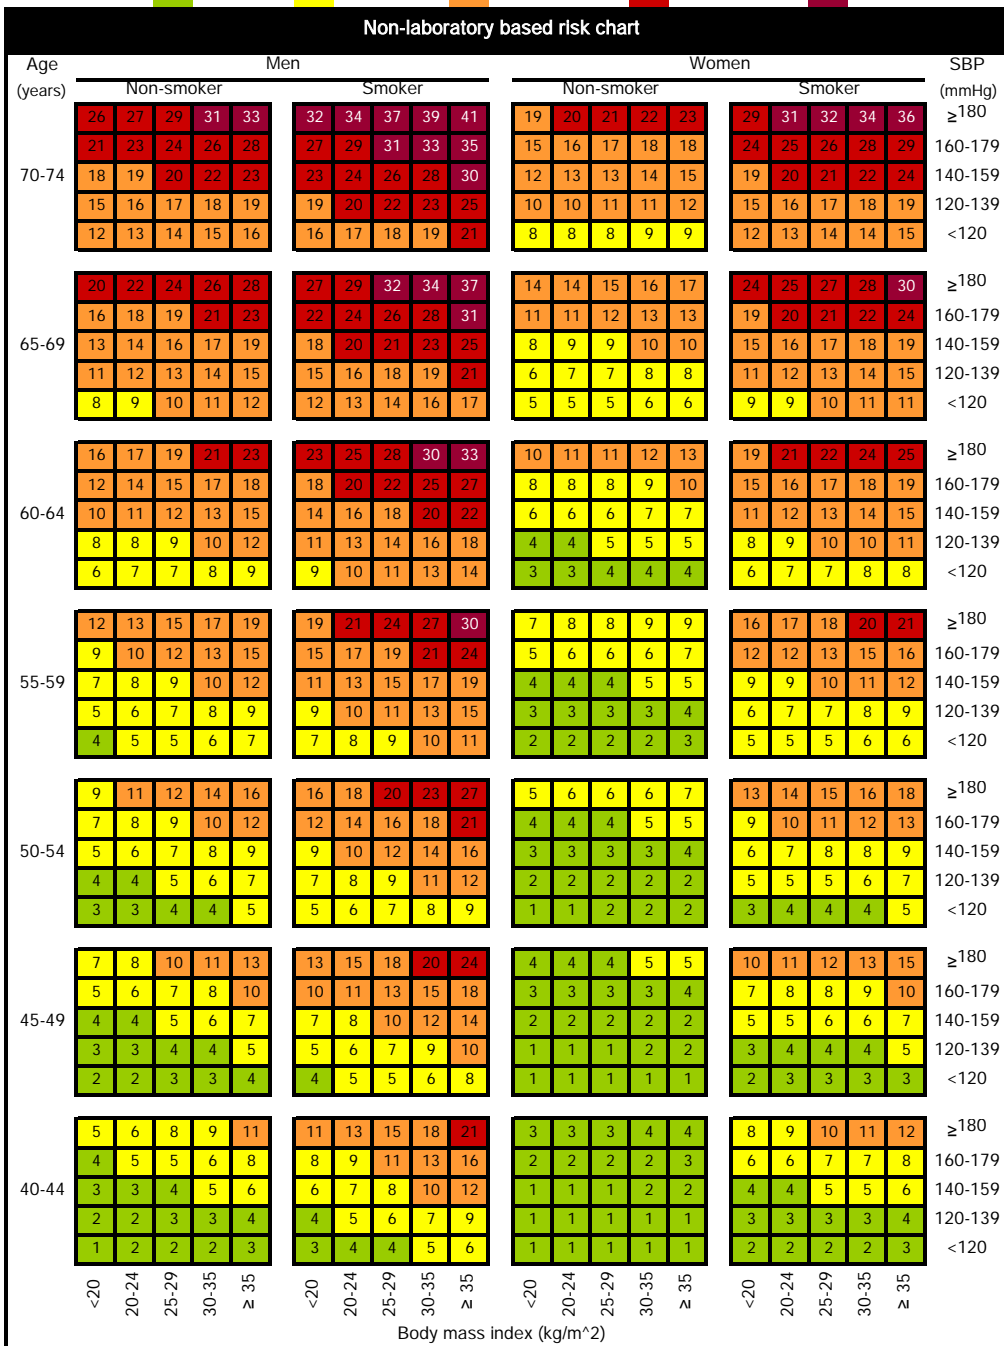

### High-income North America

Risk Level ■ <5% ■ 5% to <10% ■ 10% to <20% ■ 20% to <30% ■ ≥30%

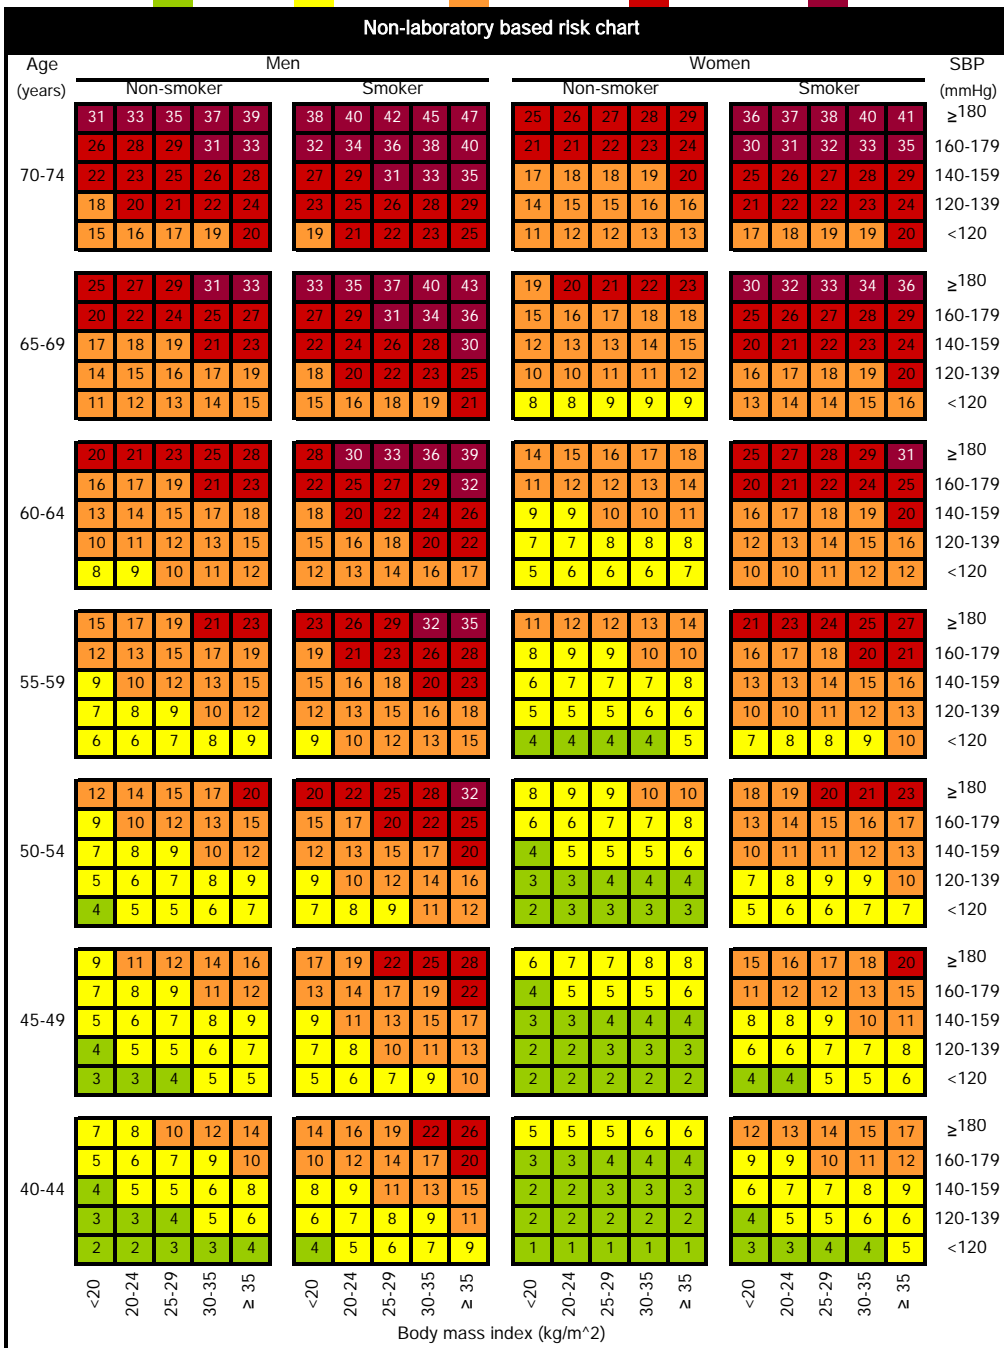

Caribbean

Risk Level ■ <5% ■ 5% to <10% ■ 10% to <20% ■ 20% to <30% ■ ≥30%

Non-laboratory based risk chart

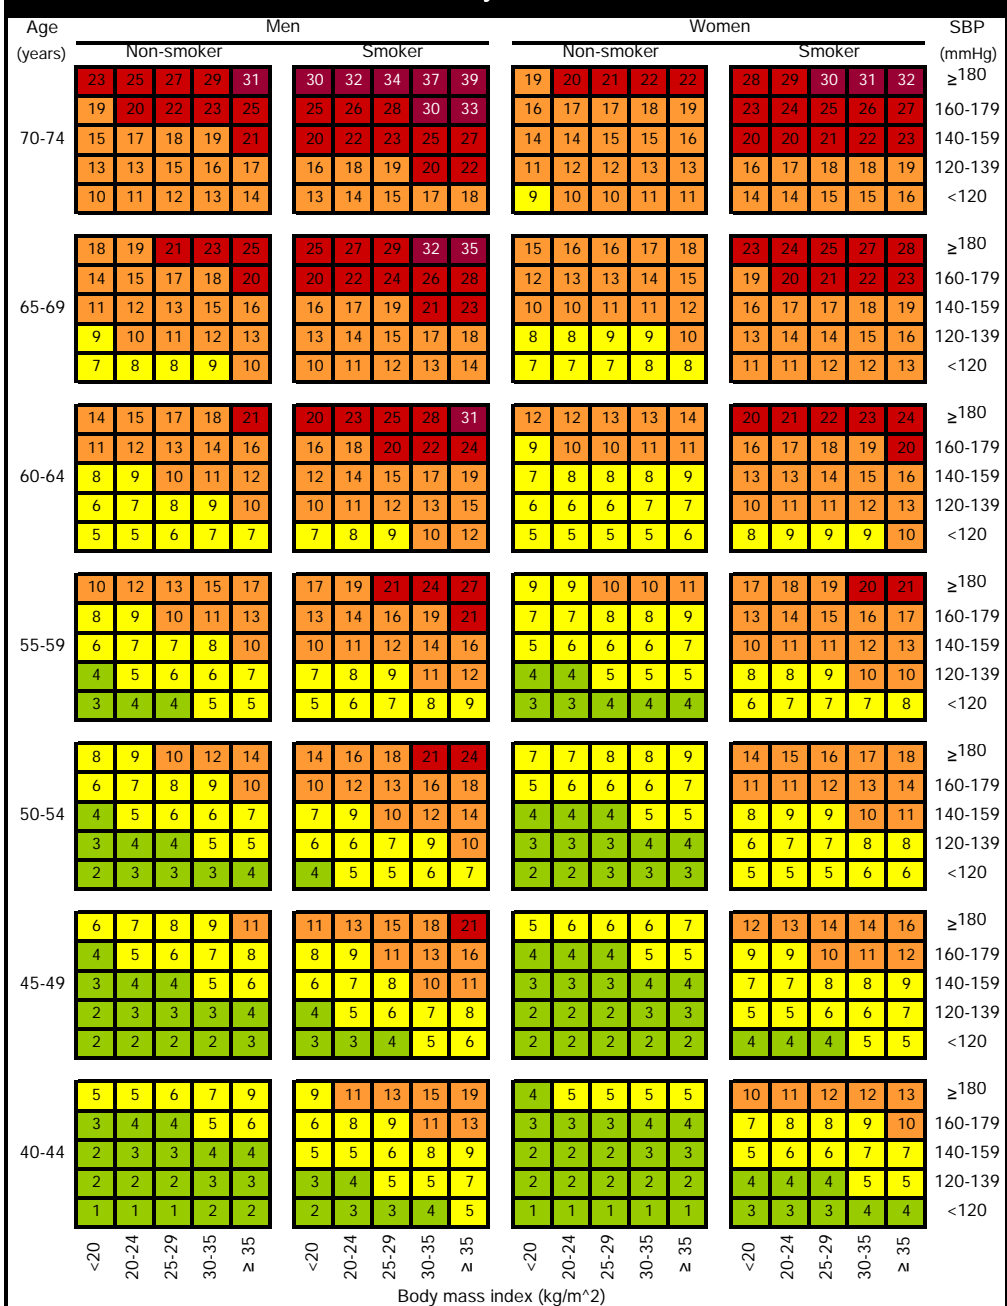



Andean Latin America

Risk Level ■ <5% ■ 5% to <10% ■ 10% to <20% ■ 20% to <30% ■ ≥30%

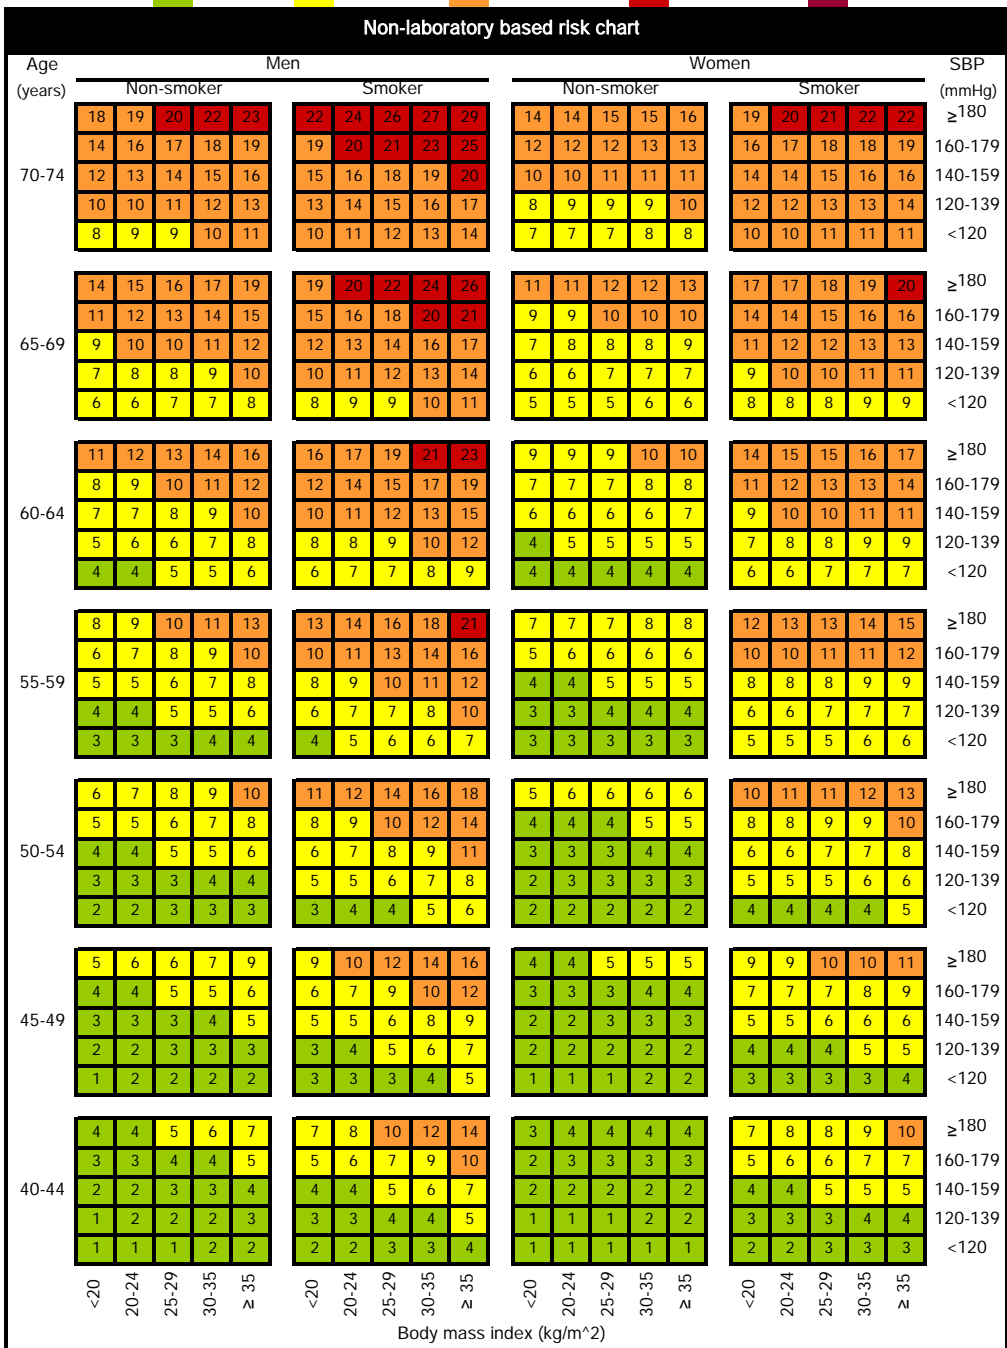

Central Latin America

Risk Level ■ <5% ■ 5% to <10% ■ 10% to <20% ■ 20% to <30% ■ ≥30%

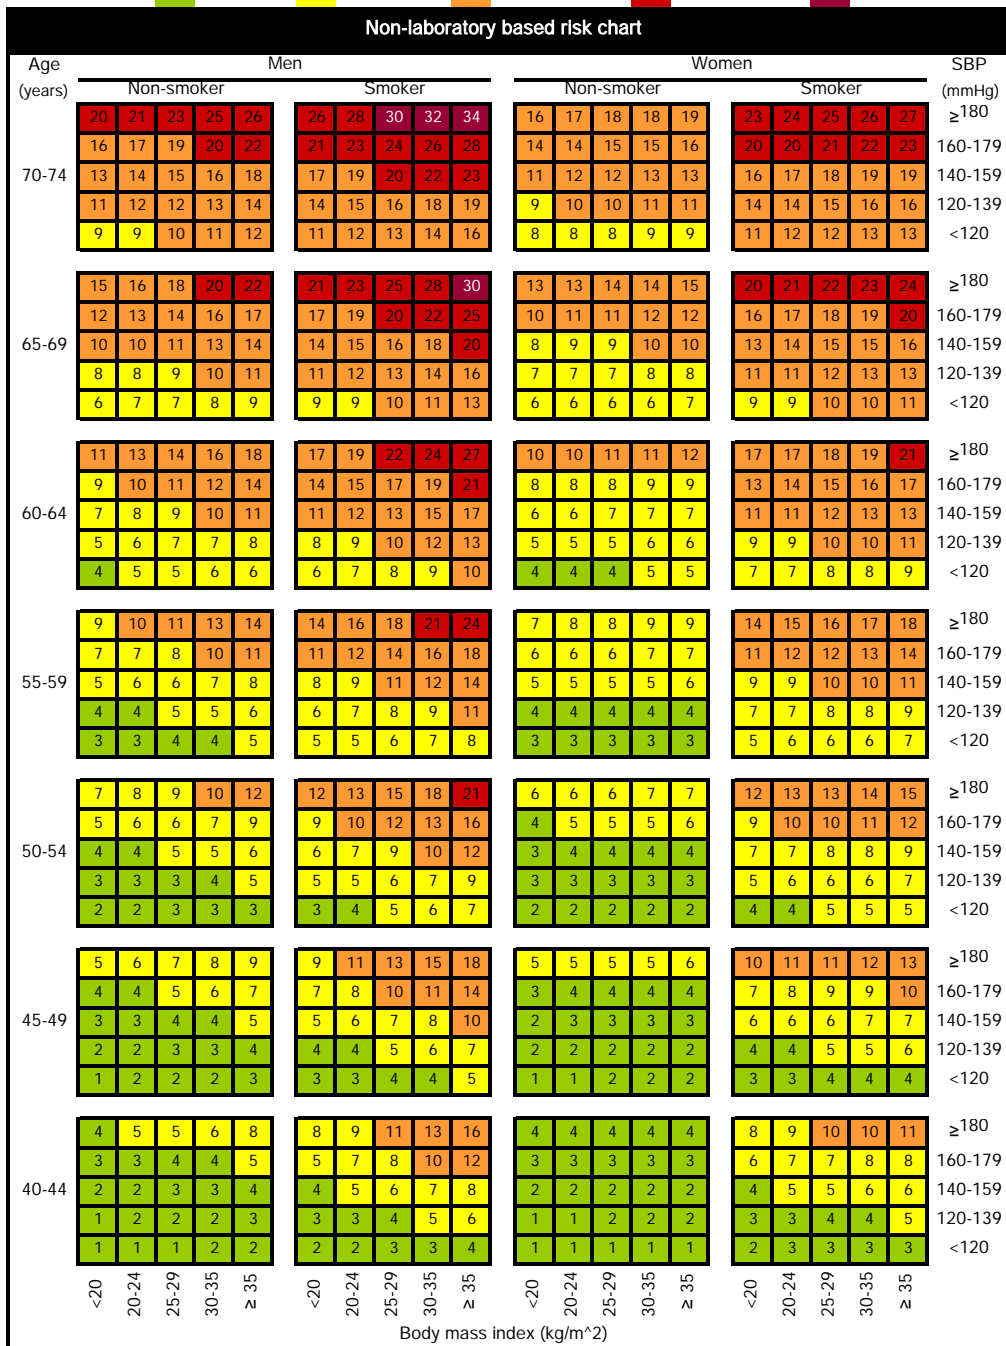

Tropical Latin America

Risk Level ■ <5% ■ 5% to <10% ■ 10% to <20% ■ 20% to <30% ■ ≥30%

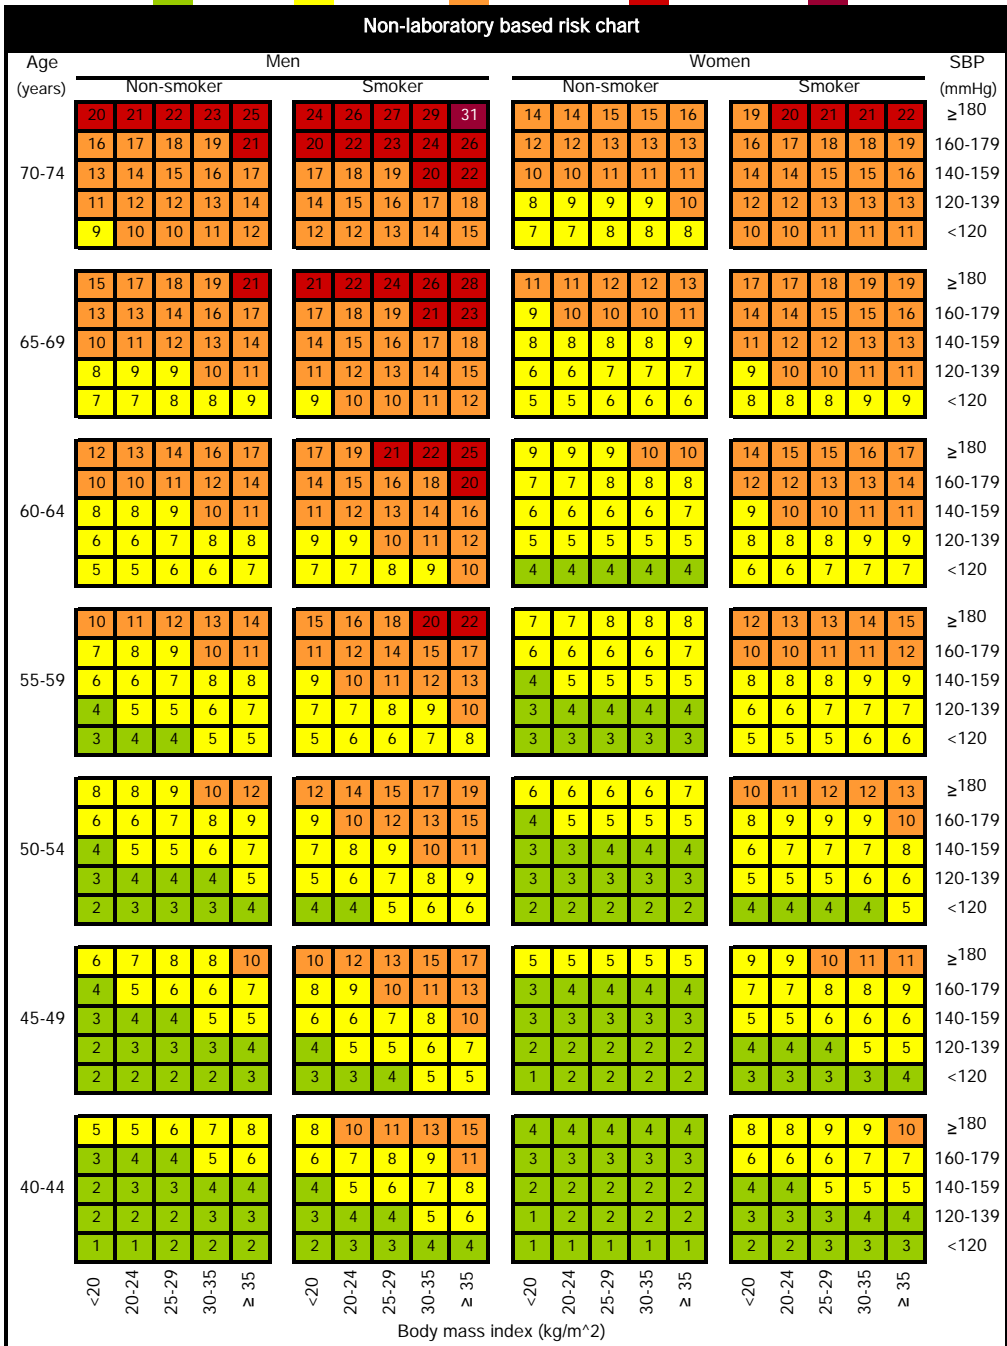

East Asia

Risk Level ■ <5% ■ 5% to <10% ■ 10% to <20% ■ 20% to <30% ■ ≥30%

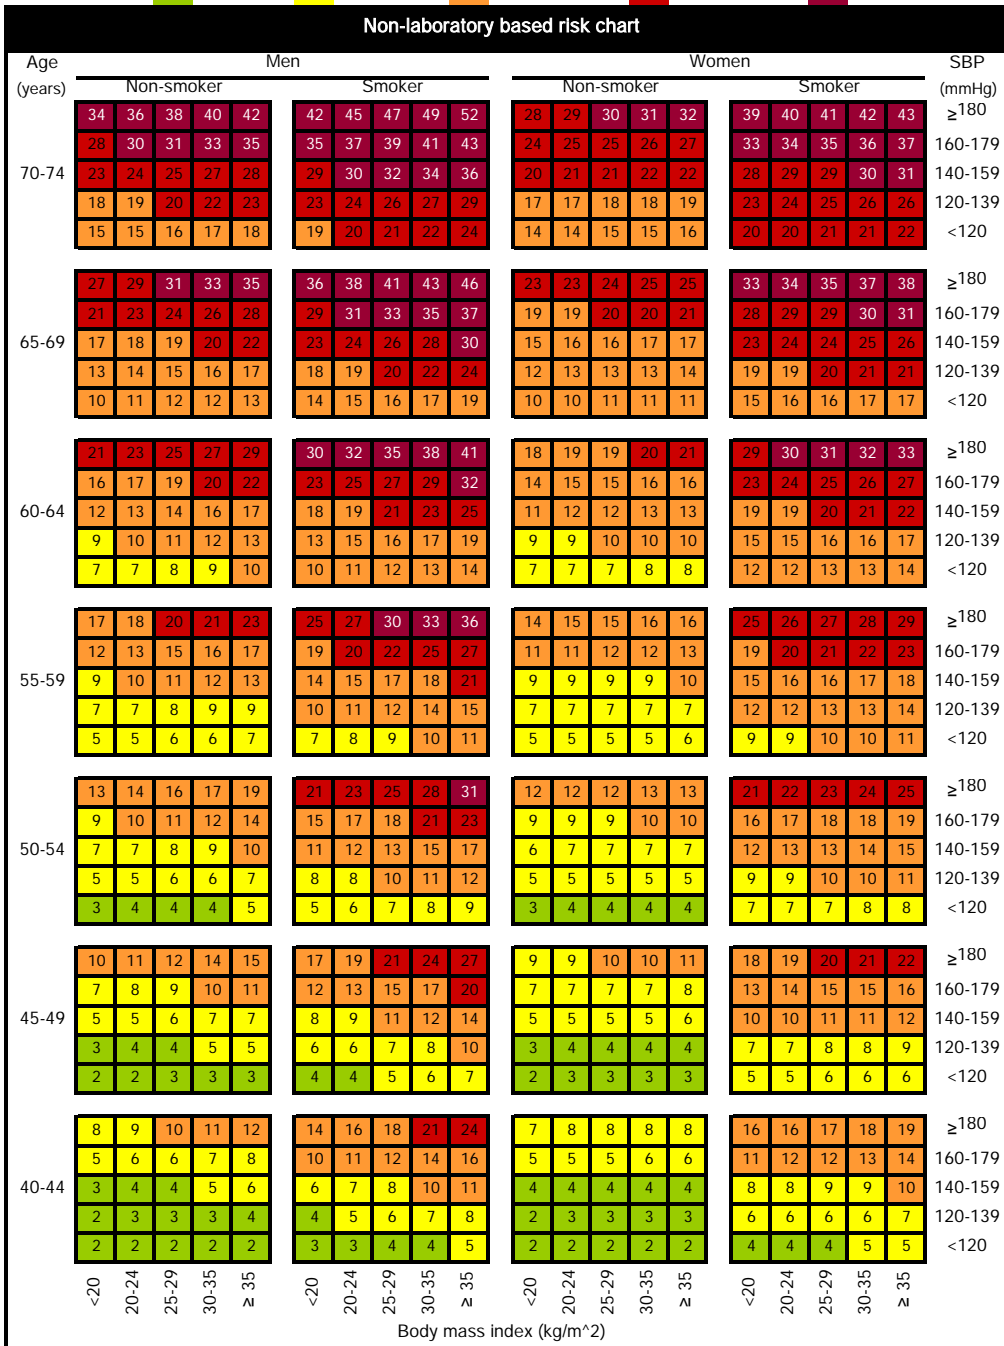

South Asia

Risk Level ■ <5% ■ 5% to <10% ■ 10% to <20% ■ 20% to <30% ■ ≥30%

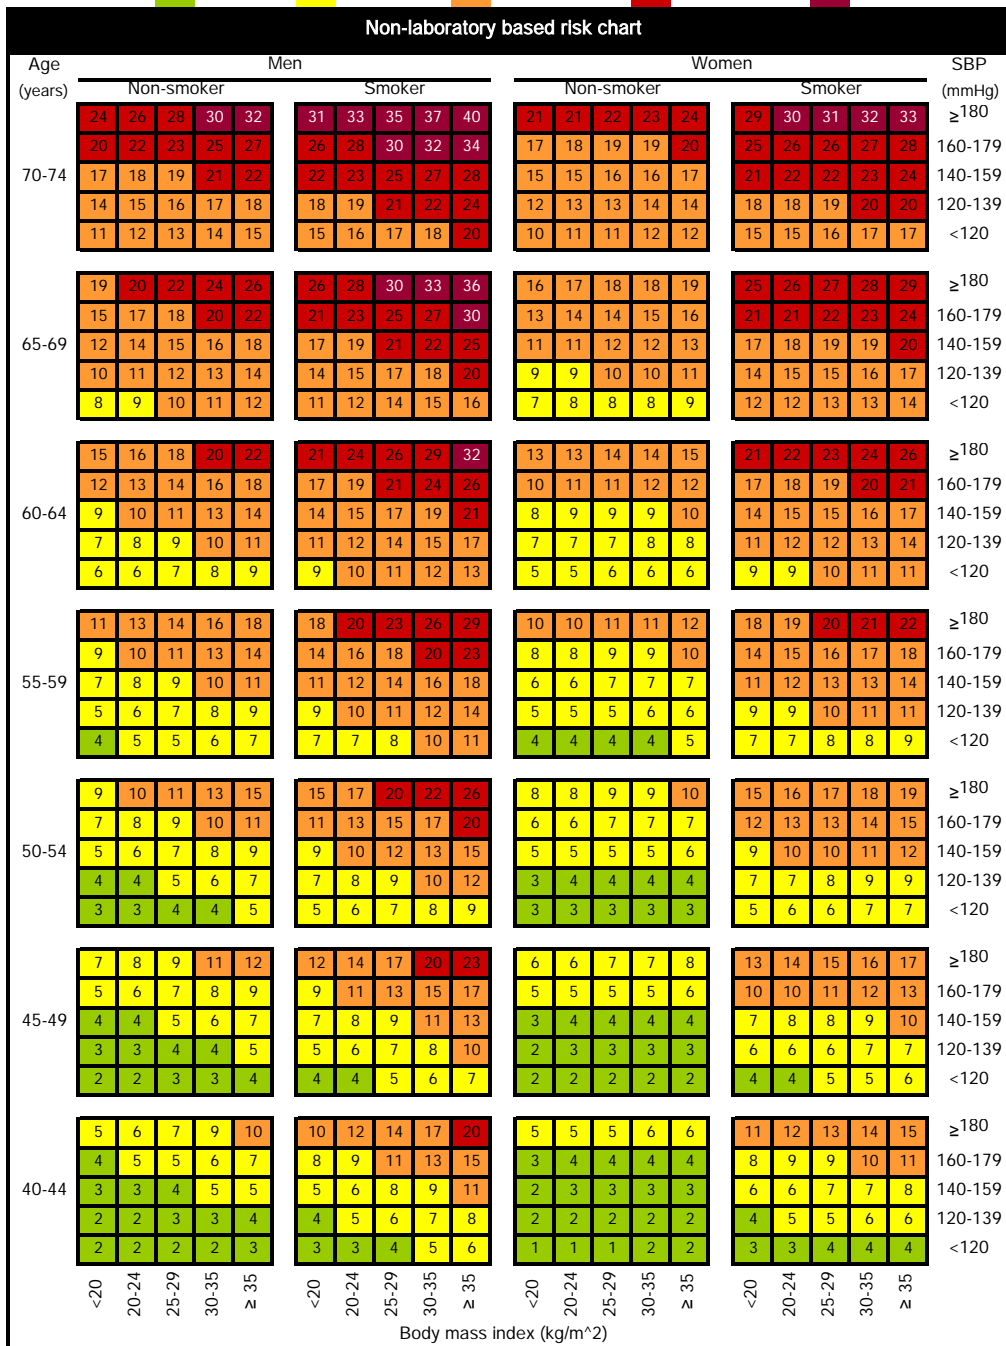

Southeast Asia

Risk Level ■ <5% ■ 5% to <10% ■ 10% to <20% ■ 20% to <30% ■ ≥30%

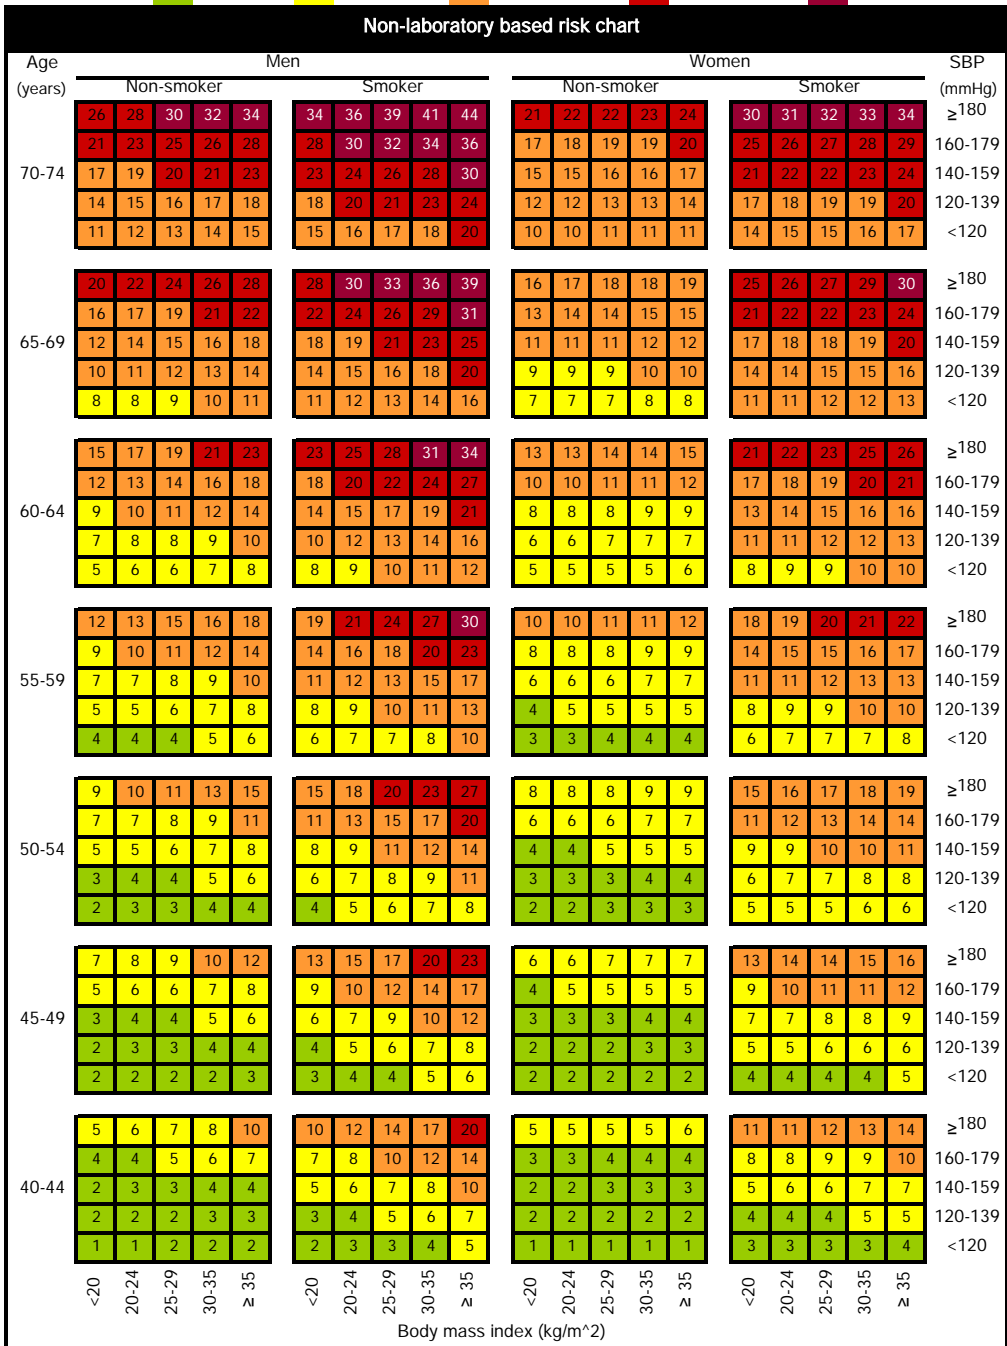

Central Asia

Risk Level ■ <5% ■ 5% to <10% ■ 10% to <20% ■ 20% to <30% ■ ≥30%

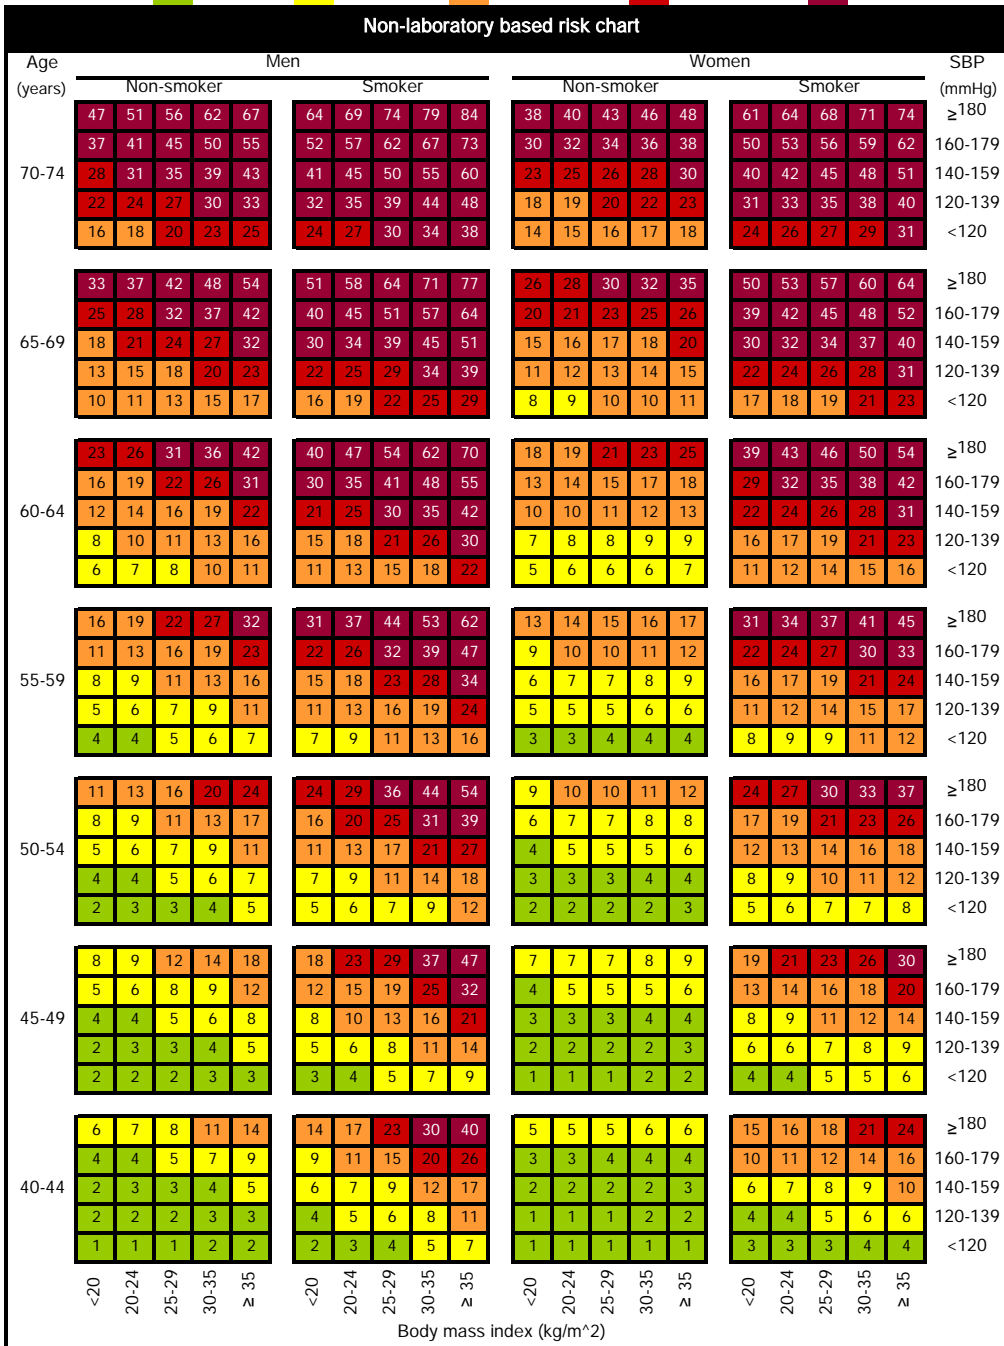

### High-income Asia Pacific

Risk Level ■ <5% ■ 5% to <10% ■ 10% to <20% ■ 20% to <30% ■ ≥30%

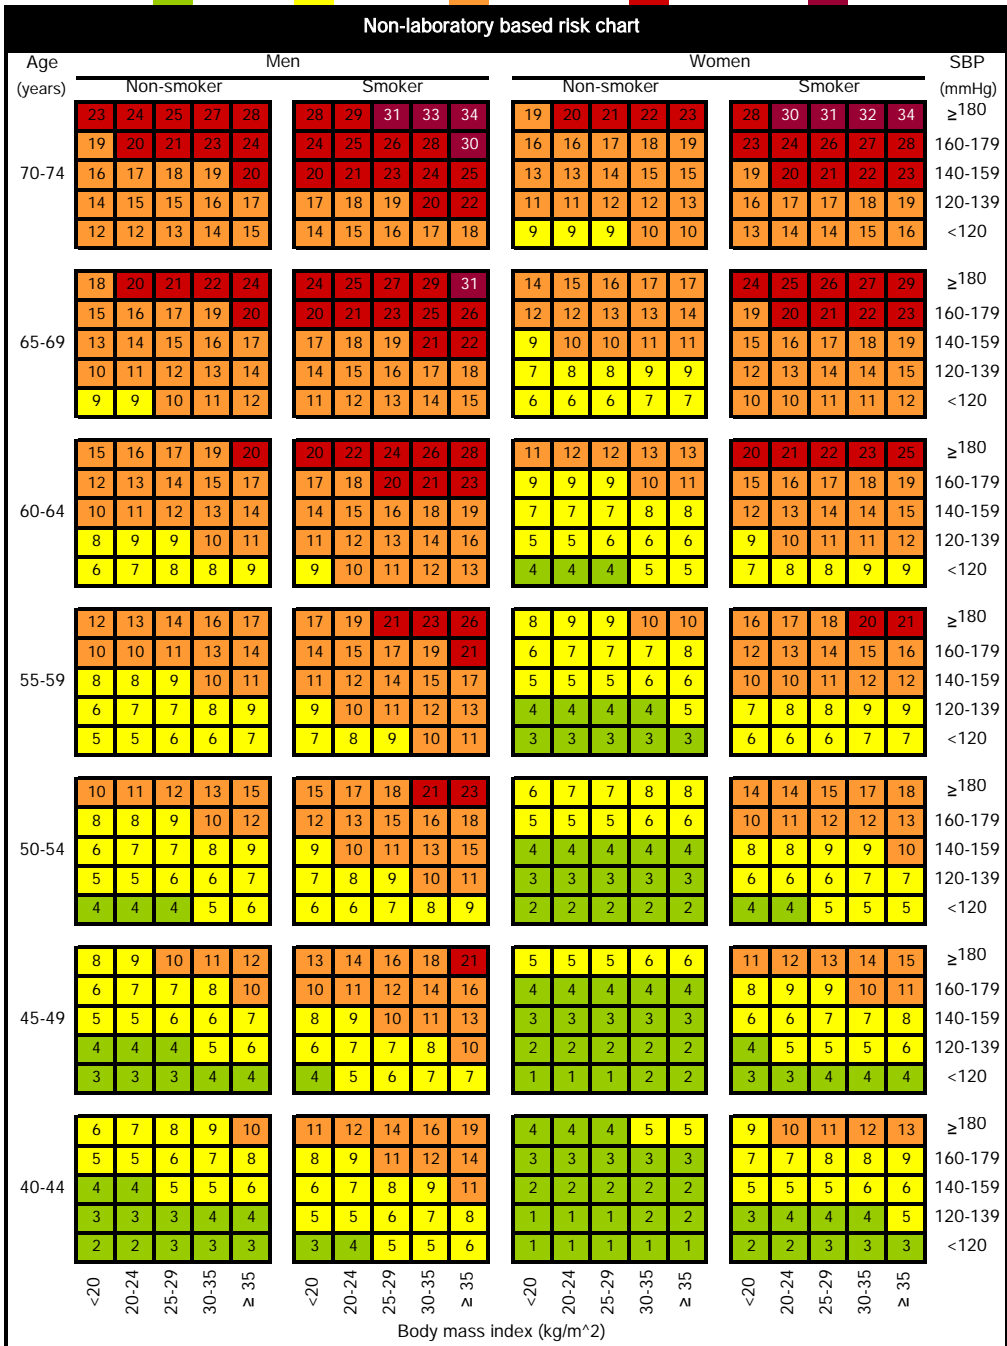



Western Europe

Risk Level ■ <5% ■ 5% to <10% ■ 10% to <20% ■ 20% to <30% ■ ≥30%

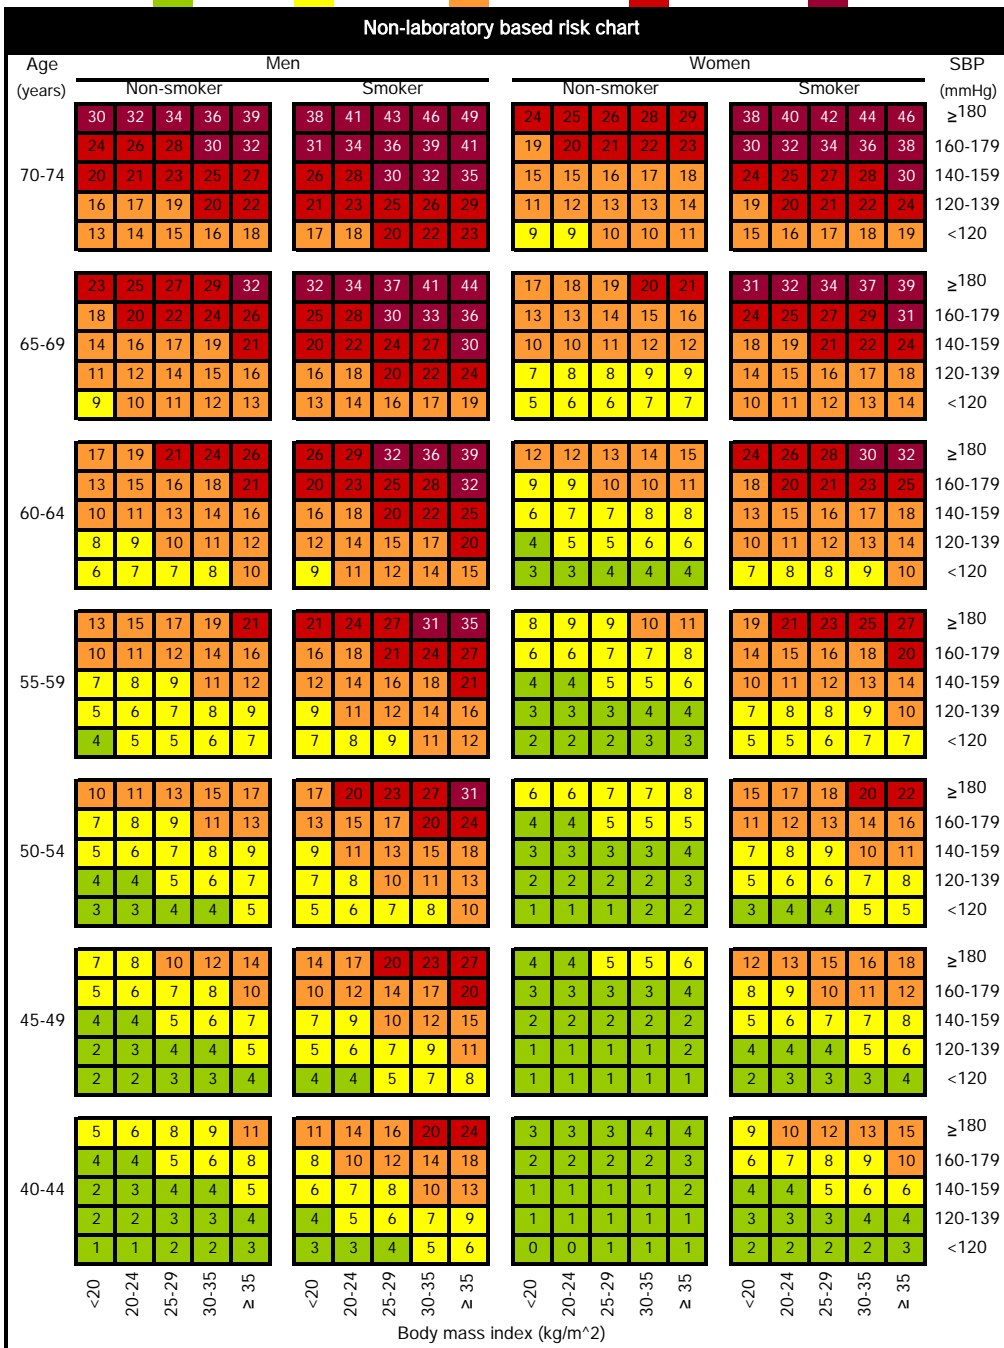

Central Europe

Risk Level ■ <5% ■ 5% to <10% ■ 10% to <20% ■ 20% to <30% ■ ≥30%

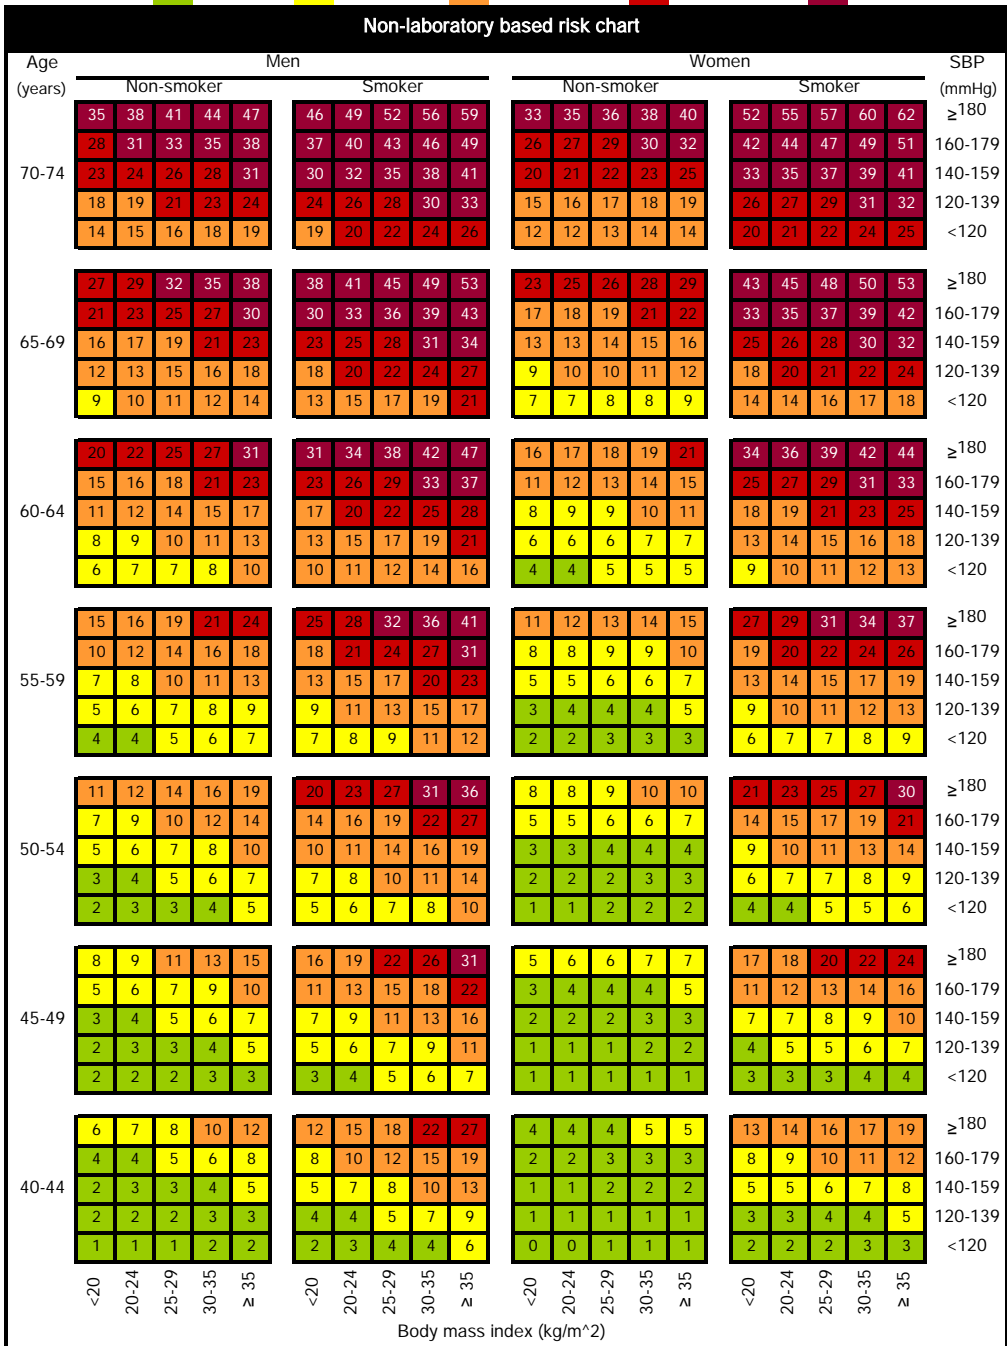

### Eastern Europe

Risk Level ■ <5% ■ 5% to <10% ■ 10% to <20% ■ 20% to <30% ■ ≥30%

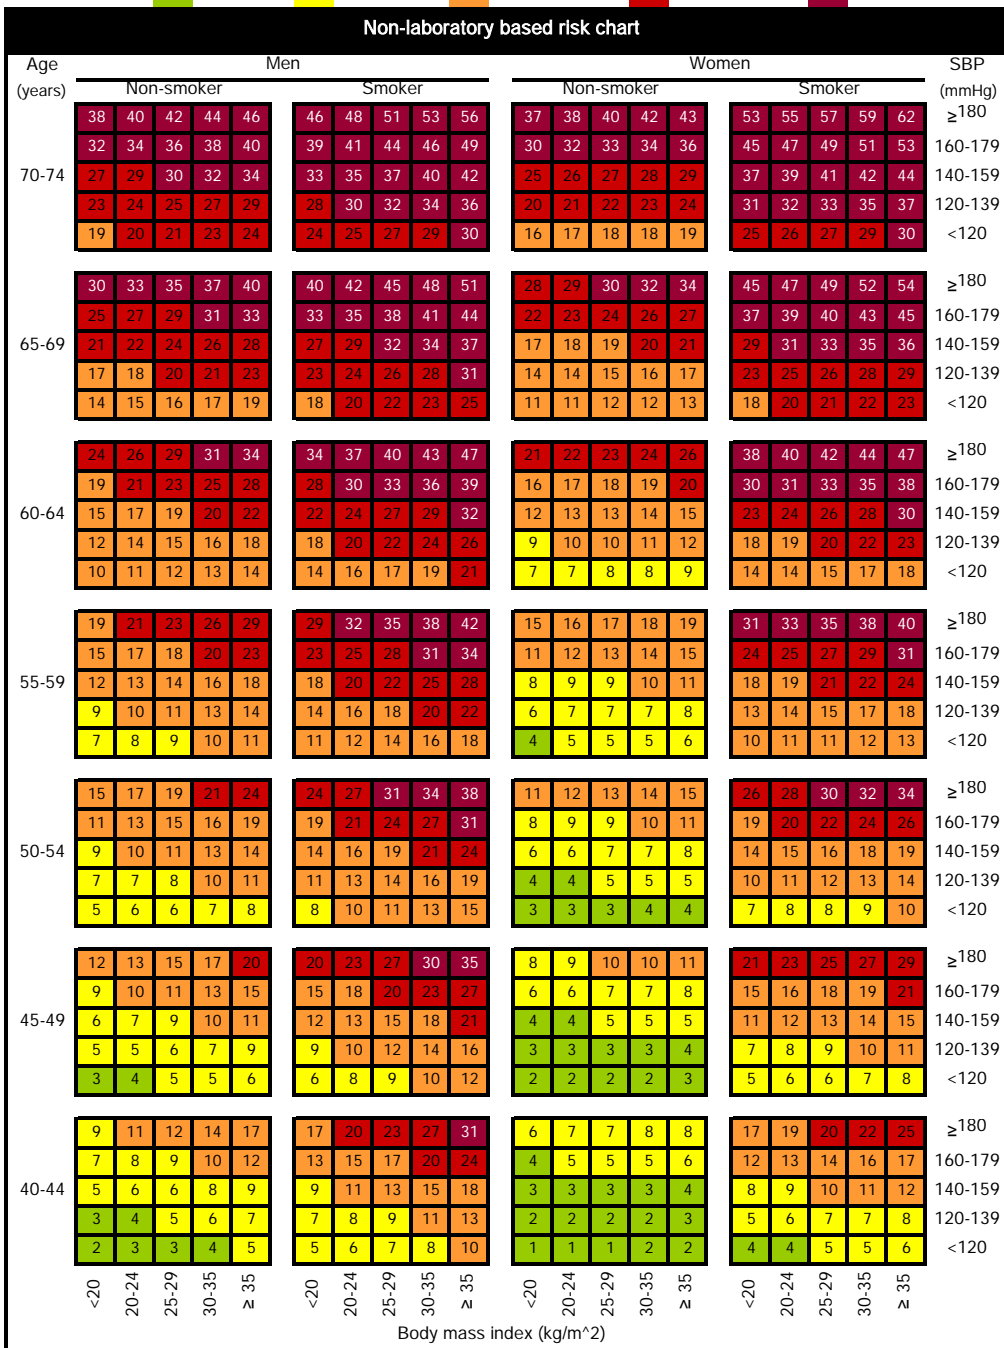

Oceania

Risk Level ■ <5% ■ 5% to <10% ■ 10% to <20% ■ 20% to <30% ■ ≥30%

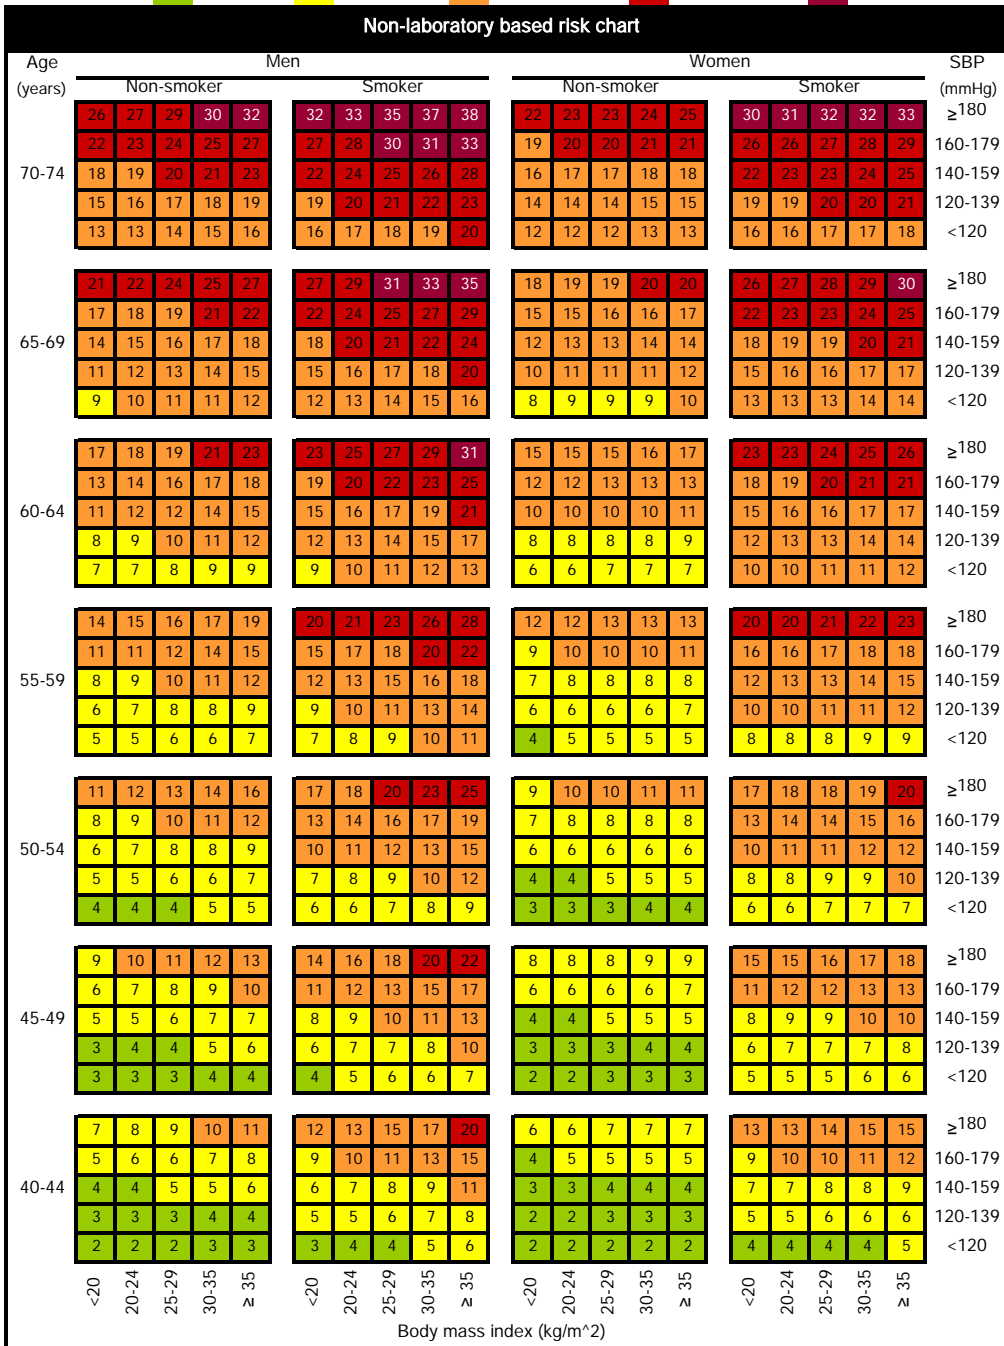

Australasia

Risk Level ■ <5% ■ 5% to <10% ■ 10% to <20% ■ 20% to <30% ■ ≥30%

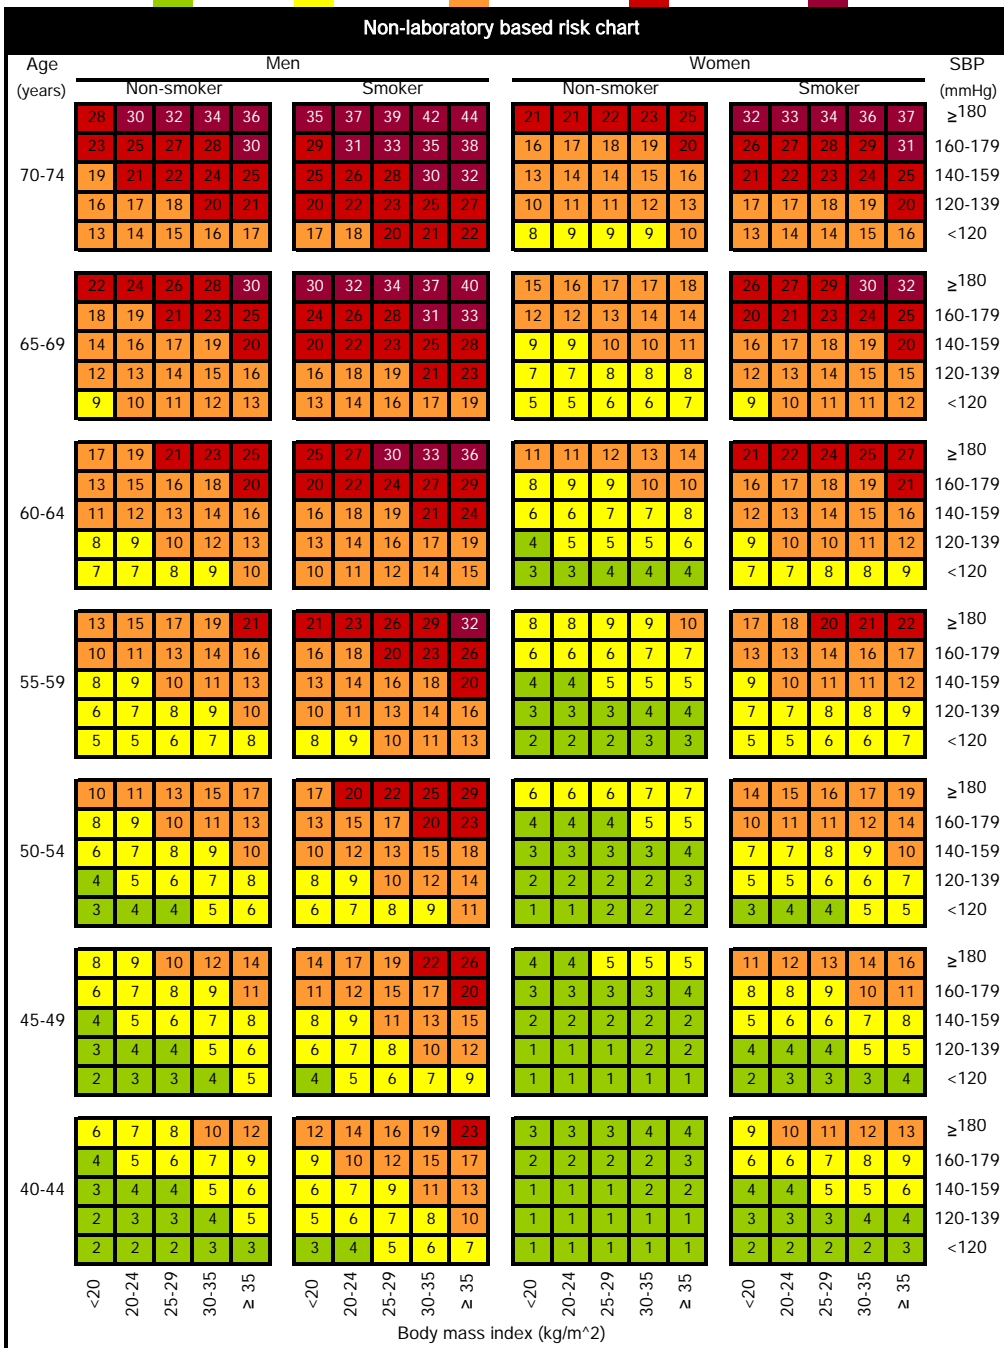

Supplement: mmc2.pdf [file mmc2.pdf]
